# Supplementary material for: Young consumers’ perceptions of and preferences for alternative meats: an empirical study in Japan and China
Source: Frontiers journal article supplement (doi:10.3389/fsufs.2023.1290131), 2023-11-10
Supplement: Data_Sheet_2.xlsx [file Data_Sheet_2.xlsx]

## Sheet: Japan_data
ID	information	BLOCK	gender	dietary_preference	experience	association	knowledge1	knowledge2	explanation1	test1	explanation2	test2	q1	q2	q3	q4	q5	q6	q7	q8	neophobia1	neophobia2	neophobia3	neophobia4	neophobia5	neophobia6	neophobia7	neophobia8	neophobia9	neophobia10	gcv1	gcv2	gcv3	gcv4	gcv5	gcv6	income
1	0	1	0	1	2	大豆ミート	3	3	0	0	0	0	1	2	1	2	1	1	2	2	3	4	6	4	4	3	5	4	5	1	4	4	4	4	4	4	2
2	0	1	0	1	1	大豆などを肉っぽくしている	1	3	0	0	0	0	1	2	1	2	2	1	2	2	3	5	6	6	5	5	5	5	6	5	2	6	6	6	4	3	3
3	0	1	1	1	4	まずい	1	1	0	0	0	0	1	1	1	1	1	1	2	1	4	3	4	4	5	4	5	4	4	4	4	4	4	4	4	4	1
4	0	1	0	1	3	コオロギ	1	3	0	0	0	0	1	2	2	2	2	1	1	2	4	5	7	5	4	3	6	7	5	4	7	6	6	6	5	4	2
5	0	1	1	1	3	大豆	1	2	0	0	0	0	2	3	2	1	2	3	1	1	5	2	2	3	4	5	2	2	5	4	6	6	6	6	5	6	1
6	0	1	1	1	4	怖い	1	2	0	0	0	0	1	2	1	2	1	2	2	1	3	4	6	1	5	2	6	3	3	1	6	6	6	4	6	2	2
7	0	1	1	1	4	大豆ミート	1	3	0	0	0	0	1	2	2	2	2	1	2	1	2	4	5	3	5	4	5	5	4	2	7	5	4	5	5	4	3
8	0	1	1	2	3	大豆ミート	2	1	0	0	0	0	1	3	3	2	1	2	3	2	4	2	3	4	4	3	2	2	5	5	4	5	3	4	6	6	2
9	0	1	1	1	3	おからハンバーグ	3	3	0	0	0	0	1	2	1	1	2	2	1	1	5	3	5	5	3	5	3	5	2	5	5	3	2	5	3	3	3
10	0	1	1	4	1	大豆	1	2	0	0	0	0	2	2	2	2	3	2	2	2	6	2	5	4	5	5	4	5	6	4	6	6	6	5	5	4	2
11	0	1	1	5	1	大豆ミート	1	2	0	0	0	0	1	1	1	1	1	1	1	1	5	3	4	6	3	4	4	4	6	5	6	5	5	5	5	5	2
12	0	1	0	1	1	ヘルシーで前進的	1	2	0	0	0	0	1	2	1	1	1	2	2	2	5	4	6	7	3	5	5	7	5	5	5	4	4	4	5	5	3
13	0	1	1	1	3	大豆ミート、ダイエット	1	3	0	0	0	0	2	2	2	1	1	2	2	1	2	5	5	4	6	2	6	4	2	2	2	5	4	5	4	4	2
14	0	1	1	1	4	肉じゃないけど肉の味がするもの	1	3	0	0	0	0	1	2	1	2	2	1	2	2	2	5	7	5	4	3	5	6	2	2	7	4	2	5	4	4	1
15	0	1	0	1	4	不味い	3	3	0	0	0	0	3	3	3	3	3	3	3	3	3	3	3	4	3	3	5	3	3	2	5	3	5	4	5	3	1
16	0	1	1	1	4	わからない	3	3	0	0	0	0	3	2	3	3	3	3	3	3	1	6	6	2	5	1	7	7	1	1	5	5	4	5	3	3	3
17	0	1	0	1	4	大豆	1	3	0	0	0	0	1	2	1	2	3	1	2	2	2	1	2	6	4	3	1	1	7	1	6	3	3	4	6	5	2
18	0	1	0	4	4	あ	3	3	0	0	0	0	1	1	1	1	1	1	1	1	1	7	4	4	4	4	4	4	4	4	4	4	4	4	4	4	3
19	0	1	1	1	1	大豆	1	3	0	0	0	0	1	2	2	2	2	2	2	2	4	3	3	5	2	5	4	5	5	5	5	5	5	5	4	5	2
20	0	1	0	1	2	曲ツイン	1	1	0	0	0	0	1	2	2	1	1	2	1	1	5	3	2	5	4	4	5	3	3	4	5	3	4	3	3	3	2
21	0	1	0	1	2	大豆でできたハンバーグ	1	2	0	0	0	0	1	2	2	2	2	2	2	2	3	4	4	5	5	4	4	3	3	3	4	4	3	4	3	4	1
22	0	1	1	1	2	おいしくない	3	3	0	0	0	0	1	2	1	2	3	1	2	2	2	5	5	2	4	3	6	5	2	3	5	4	4	3	4	4	2
23	0	1	0	2	2	大豆	2	2	0	0	0	0	1	1	1	2	2	1	2	1	4	3	2	6	3	2	3	4	3	1	2	2	2	1	3	5	2
24	0	1	0	4	3	特になし	2	3	0	0	0	0	3	2	3	2	2	2	3	3	7	5	7	6	6	4	6	6	5	7	6	5	4	6	3	7	3
25	0	1	1	1	1	豆類	1	3	0	0	0	0	1	2	1	1	2	2	2	1	4	3	3	2	4	4	5	5	5	4	4	5	5	5	5	4	2
26	0	1	1	4	4	よく分からない	3	3	0	0	0	0	3	3	3	3	3	3	3	3	1	4	7	4	5	1	4	4	4	3	6	4	4	4	4	4	1
27	0	1	0	1	4	大豆	3	3	0	0	0	0	2	2	1	1	1	2	2	1	1	4	4	4	4	2	5	4	5	4	4	4	4	4	4	4	2
28	0	1	1	1	4	大豆	3	3	0	0	0	0	1	3	3	3	3	3	3	3	4	4	3	4	4	5	4	4	4	5	5	5	4	3	4	5	1
29	0	1	0	1	4	ヘルシー	1	3	0	0	0	0	1	1	3	2	3	1	2	2	1	2	2	3	4	1	6	3	2	3	6	5	3	5	4	3	2
30	0	1	0	2	2	特に不幸と	2	3	0	0	0	0	2	2	1	1	3	2	1	2	3	5	5	3	5	4	4	2	5	4	3	2	4	3	5	4	3
31	0	1	1	1	2	豆、豆腐	1	3	0	0	0	0	1	2	1	1	2	2	2	1	3	1	6	6	1	5	3	5	3	3	3	3	1	3	2	5	4
32	0	1	0	1	1	環境にやさしい	1	3	0	0	0	0	2	3	3	1	3	2	3	1	3	4	4	4	4	4	5	2	4	4	5	4	4	4	4	4	1
33	0	1	1	4	1	大豆	1	3	0	0	0	0	1	3	3	3	2	2	2	1	5	4	7	5	3	5	5	7	5	5	5	4	5	4	3	4	2
34	0	1	0	1	1	豆腐	1	3	0	0	0	0	1	2	1	1	1	2	2	2	2	2	7	6	4	5	2	1	5	4	5	5	4	3	4	3	3
35	0	1	0	1	3	合成肉	1	3	0	0	0	0	1	2	1	2	2	1	2	2	3	3	1	6	4	2	4	2	3	4	2	3	3	4	3	4	1
36	0	1	1	1	4	よく分からない	3	3	0	0	0	0	3	3	3	3	3	3	3	3	3	6	7	1	7	2	7	4	1	1	1	1	1	1	1	1	1
37	0	1	0	1	1	新しい商品である。	1	1	0	0	0	0	1	2	2	1	2	1	2	1	5	4	5	5	4	5	4	4	5	4	5	5	5	5	5	5	1
38	0	1	1	1	4	なし	3	3	0	0	0	0	3	3	3	3	3	3	3	3	4	4	4	4	4	4	4	4	4	4	4	4	4	4	4	4	3
39	0	1	1	1	4	怖い	1	1	0	0	0	0	1	3	2	2	3	3	1	1	1	5	7	1	5	5	6	5	6	2	5	4	6	3	5	5	3
40	0	1	0	1	4	大豆、培養肉	1	1	0	0	0	0	1	2	1	2	1	3	2	3	2	3	5	4	5	1	7	3	5	1	3	3	2	3	2	2	2
41	0	1	0	1	4	なし	3	3	0	0	0	0	1	3	3	3	3	2	2	2	4	4	4	4	3	3	4	4	5	5	3	2	4	4	4	5	3
42	0	1	1	1	1	冷凍食品	1	1	0	0	0	0	1	2	2	2	3	2	3	2	5	2	2	6	2	6	2	4	7	6	7	7	7	7	7	7	2
43	0	1	0	1	3	スポンジ牛	1	3	0	0	0	0	1	1	1	1	1	1	3	2	7	1	1	6	2	5	1	3	6	4	2	2	2	6	3	4	1
44	0	1	1	4	4	肉の味がしない	3	3	0	0	0	0	3	2	1	2	2	2	2	3	1	5	7	1	7	1	7	7	4	1	4	4	4	4	4	4	2
45	0	1	0	1	4	なし	3	3	0	0	0	0	3	3	3	3	3	3	3	3	4	4	2	4	4	4	3	3	4	4	4	4	5	4	2	3	2
46	0	1	1	1	1	大豆ミート	1	3	0	0	0	0	1	2	1	2	1	1	2	2	4	4	4	6	4	4	4	4	4	5	4	4	4	4	4	4	1
47	0	1	0	2	1	大豆	1	1	0	0	0	0	1	2	1	1	2	2	2	1	5	4	2	4	4	2	4	3	4	3	5	5	3	4	2	5	2
48	0	1	0	1	3	大豆	1	1	0	0	0	0	1	1	1	1	1	1	2	1	6	4	5	7	5	5	4	5	6	6	5	6	5	7	6	5	1
49	0	1	1	4	4	なし	1	2	0	0	0	0	3	3	3	3	3	3	3	3	4	4	4	4	4	4	4	4	4	4	4	4	4	4	4	4	1
50	0	1	1	1	3	魚肉ソーセージ	1	3	0	0	0	0	1	2	1	1	2	2	2	1	3	5	6	3	5	2	6	6	2	3	5	5	5	5	3	4	2
51	0	1	0	1	3	本物の肉のような味がする食べ物	3	3	0	0	0	0	1	2	1	2	1	1	2	2	4	4	4	4	4	4	4	4	5	4	4	4	4	4	4	4	2
52	0	1	0	1	4	不安	3	3	0	0	0	0	1	2	1	2	3	3	2	3	3	3	5	6	5	2	2	4	5	3	2	2	1	1	1	1	2
53	0	1	0	1	4	大豆	1	3	0	0	0	0	1	2	1	2	1	1	2	2	1	5	5	1	6	3	5	3	2	2	2	2	2	2	2	2	2
54	0	1	1	1	2	豚肉	3	3	0	0	0	0	1	1	2	2	2	1	2	1	5	6	6	2	3	5	7	1	5	5	5	4	4	3	2	3	1
55	0	1	1	1	4	大豆	3	3	0	0	0	0	1	3	2	2	3	2	1	2	2	4	3	3	4	2	5	3	3	2	5	4	4	4	4	4	2
56	0	1	1	1	3	何かの代わり	1	3	0	0	0	0	1	2	2	2	2	2	2	2	4	3	5	4	5	3	5	3	2	3	3	2	2	3	3	3	2
57	0	1	1	1	3	食感で違いが分かりそう	1	1	0	0	0	0	1	2	2	1	2	2	2	1	3	2	5	6	2	6	2	3	5	6	6	6	6	6	6	6	2
58	0	1	0	1	2	美味しく無い、満足感がない	1	2	0	0	0	0	1	3	3	3	3	2	2	2	3	5	6	7	2	5	4	4	6	6	3	3	3	3	3	3	2
59	0	1	1	1	3	お肉の代わりに他のもので代用する	1	1	0	0	0	0	1	1	1	1	1	2	2	1	5	2	5	4	4	5	4	4	3	4	4	4	4	4	4	4	1
60	0	1	0	1	3	代わりになっているのであまり美味しくないよう思います。	1	3	0	0	0	0	2	2	1	2	1	2	1	2	5	2	5	7	4	6	4	1	7	5	7	4	6	6	6	7	2
61	0	1	1	1	4	美味しくなさそう	1	3	0	0	0	0	1	2	1	2	2	1	2	3	2	4	3	5	4	1	5	4	4	3	6	4	5	6	3	5	1
62	0	1	1	1	4	特になし	3	2	0	0	0	0	3	3	3	3	3	3	3	3	3	4	5	3	4	3	5	3	2	3	4	5	3	4	3	3	2
63	0	1	0	4	4	v	2	3	0	0	0	0	3	3	3	3	3	3	3	3	7	6	2	5	5	4	4	3	4	2	5	5	3	3	6	4	1
64	0	1	0	1	2	特にイメージはない	3	3	0	0	0	0	3	3	3	3	3	3	3	3	3	5	5	6	5	5	5	5	5	6	5	6	5	5	5	6	1
65	0	1	1	1	4	特になし	3	3	0	0	0	0	3	3	3	3	3	3	3	2	5	3	5	4	4	3	4	2	4	1	5	5	3	4	4	4	1
66	0	1	0	1	4	特にない	1	1	0	0	0	0	3	3	3	3	3	3	3	3	4	5	6	2	7	2	7	5	2	2	4	4	2	4	7	6	3
67	0	1	1	1	3	普通の肉よりも栄養価が少ない	3	3	0	0	0	0	1	2	1	2	1	2	2	1	5	4	5	5	4	4	5	5	5	4	4	4	3	5	4	4	1
68	0	1	1	1	1	大豆 豆腐	1	2	0	0	0	0	1	2	2	2	2	2	1	1	5	3	5	4	3	5	3	5	3	4	5	4	4	4	5	4	3
69	0	1	0	1	3	人工的	1	1	0	0	0	0	1	2	2	2	3	2	1	1	6	3	5	6	4	5	5	6	2	4	6	5	4	6	5	5	3
70	0	1	1	1	3	特にない	3	3	0	0	0	0	3	3	3	3	3	3	3	3	4	5	6	3	4	4	5	4	3	2	5	4	3	5	5	4	1
71	0	1	1	1	3	新食感	3	2	0	0	0	0	3	2	3	2	1	3	2	3	1	5	7	1	6	1	7	6	1	1	7	5	5	5	4	5	2
72	0	1	0	1	4	わかりません	1	1	0	0	0	0	1	1	2	1	1	2	1	2	4	4	4	4	4	4	4	4	4	4	4	4	4	4	4	4	1
73	0	1	1	1	4	美味しそうではない	3	3	0	0	0	0	3	3	3	3	3	3	3	3	4	4	4	4	4	4	4	4	4	4	5	4	4	3	4	4	1
74	0	1	0	1	1	大豆	1	1	0	0	0	0	1	2	2	2	1	2	2	1	5	3	5	6	4	5	4	5	6	4	5	5	4	5	5	4	1
75	0	1	0	1	2	人工的なもの	3	1	0	0	0	0	1	2	1	2	2	1	2	2	2	4	6	4	5	3	6	4	4	3	3	3	5	5	3	3	3
76	0	1	1	1	3	大豆	1	1	0	0	0	0	1	2	2	2	2	2	1	1	3	2	5	6	1	7	2	7	7	5	3	2	4	5	5	4	2
77	0	1	0	1	1	大豆ミート	1	1	0	0	0	0	1	2	1	1	2	2	2	1	2	3	3	5	5	4	5	2	6	3	5	5	5	5	4	3	2
78	0	1	0	2	3	昆虫	2	3	0	0	0	0	2	2	1	2	2	1	1	2	3	3	3	4	5	4	3	5	2	5	3	5	3	4	6	6	2
79	0	1	0	1	3	豆腐	1	1	0	0	0	0	1	2	1	2	3	1	2	2	2	5	5	2	4	3	6	5	4	3	5	4	5	5	5	4	3
80	0	1	0	1	1	大豆肉	1	3	0	0	0	0	3	3	3	3	3	3	3	3	4	4	4	5	3	4	4	3	4	5	4	2	4	6	5	5	2
81	0	1	1	1	2	わからない	3	3	0	0	0	0	1	1	1	1	1	1	1	1	1	6	7	3	5	1	7	4	5	2	5	3	5	4	4	4	1
82	0	1	0	1	2	大豆肉	1	3	0	0	0	0	1	2	1	2	1	1	2	2	4	3	5	6	1	4	4	4	5	7	7	5	4	6	4	4	1
83	0	1	0	2	2	わからない	2	2	0	0	0	0	1	1	2	1	2	1	2	1	3	3	2	3	3	3	2	4	3	3	3	1	4	4	4	2	2
84	0	1	0	1	3	大豆ミート	1	3	0	0	0	0	3	2	1	1	1	2	2	1	2	2	5	5	4	3	5	1	5	3	5	1	1	1	2	1	2
85	0	1	1	1	4	肉の代わりになる品物	3	3	0	0	0	0	3	3	3	3	3	3	3	3	2	4	5	4	4	3	4	4	6	4	4	4	4	4	4	4	1
86	0	1	0	1	4	大豆	1	3	0	0	0	0	1	2	1	2	2	1	2	2	2	6	6	5	3	4	5	4	5	5	5	5	4	5	4	4	2
87	0	1	0	1	3	特になし	1	3	0	0	0	0	2	1	1	1	2	1	2	1	3	2	5	2	2	2	2	3	4	4	6	5	5	6	3	4	3
88	0	1	1	1	4	加工、大豆	1	3	0	0	0	0	1	1	2	2	2	1	1	2	1	5	6	6	2	1	5	3	7	3	2	2	1	2	2	2	2
89	0	1	1	1	4	肉に代わるもの	3	3	0	0	0	0	3	3	3	3	3	3	3	3	3	4	5	4	4	3	4	4	6	4	4	4	4	4	4	4	1
90	0	1	1	1	4	大豆ハンバーグ	1	3	0	0	0	0	2	2	1	1	1	2	2	1	4	5	5	5	4	5	5	5	3	3	4	5	5	5	5	5	1
91	0	1	0	1	2	大豆	1	1	0	0	0	0	2	1	1	2	2	1	1	3	3	3	2	2	2	2	2	2	3	3	3	3	3	3	2	3	2
92	0	1	1	1	3	ラム	1	2	0	0	0	0	1	1	2	1	2	1	1	2	3	2	4	3	3	4	5	2	3	4	3	6	4	4	4	3	2
93	0	1	1	1	3	大豆ミート	1	3	0	0	0	0	1	2	3	2	1	2	2	1	1	4	7	2	6	1	6	5	2	1	5	2	5	6	5	4	1
94	0	1	1	1	4	なし	3	3	0	0	0	0	3	3	3	3	3	3	3	3	4	4	4	4	4	4	4	4	4	4	4	4	4	4	4	4	1
95	0	1	1	1	1	大豆ミート、マクロビオティック	1	1	0	0	0	0	1	3	2	3	2	3	2	1	7	4	7	7	1	7	1	7	7	7	4	4	4	4	4	1	3
96	0	1	0	1	2	人工の肉	1	1	0	0	0	0	1	1	1	2	2	2	1	1	5	4	6	4	5	4	4	3	5	3	6	7	6	5	6	6	2
97	0	1	1	1	1	豆腐ミート	1	1	0	0	0	0	1	3	2	2	1	2	2	1	4	4	6	7	1	6	2	7	7	7	6	6	6	7	5	6	2
98	0	1	1	4	4	とくにない	2	2	0	0	0	0	3	3	3	3	2	2	2	3	4	4	4	5	3	4	4	2	3	3	4	4	4	4	4	4	1
99	0	1	1	1	3	大豆	3	3	0	0	0	0	1	2	1	2	2	1	2	1	4	4	5	2	6	2	5	4	1	1	6	4	4	4	4	4	1
100	0	1	0	1	4	大豆	1	3	0	0	0	0	2	2	1	1	1	1	2	2	4	4	5	4	5	3	5	4	5	3	5	4	4	4	4	4	2
101	0	1	0	1	4	マジで分かりません	3	3	0	0	0	0	1	3	3	3	3	3	2	2	6	5	3	5	3	5	4	2	5	3	5	4	1	4	2	4	3
102	0	1	1	1	3	豆腐	1	1	0	0	0	0	1	1	2	1	2	2	2	1	2	2	5	5	4	3	3	2	3	3	2	3	3	3	2	3	1
103	0	1	1	1	3	代わりの肉	3	3	0	0	0	0	1	2	2	2	2	1	1	2	1	4	7	1	6	1	7	4	2	1	4	4	2	2	1	1	1
104	0	1	0	1	2	分からない	1	1	0	0	0	0	2	3	2	3	1	3	2	2	4	5	5	7	6	7	4	4	5	4	4	3	5	3	5	3	1
105	0	1	0	1	3	肉の代わり	3	3	0	0	0	0	1	2	2	2	1	2	2	3	1	5	6	3	4	1	3	3	5	1	5	3	1	5	3	3	1
106	0	1	1	1	3	いまいち理解をしていない	1	2	0	0	0	0	1	2	1	1	1	2	2	1	1	4	3	5	5	4	2	3	6	4	5	2	1	1	1	4	2
107	0	1	1	1	4	分かりません	3	3	0	0	0	0	3	3	3	3	3	3	3	3	3	3	5	2	5	5	3	5	6	2	5	5	5	5	5	4	1
108	0	1	0	1	1	肉よりは劣っている	1	1	0	0	0	0	2	1	2	2	1	1	2	1	1	1	2	3	1	1	3	1	2	2	2	2	3	2	1	2	2
109	0	1	1	1	4	分かりません	3	3	0	0	0	0	1	3	2	2	3	3	1	1	3	1	2	7	4	6	3	1	6	4	4	4	2	4	3	3	3
110	0	1	1	1	2	大豆肉	1	1	0	0	0	0	2	2	2	1	2	1	1	2	4	4	5	5	5	4	5	3	6	4	4	3	3	4	4	3	2
111	0	1	0	1	4	なひ	2	2	0	0	0	0	1	2	3	1	1	2	1	1	5	5	3	5	5	3	2	3	3	3	4	4	3	3	2	3	4
112	0	1	1	1	3	大豆ミートのように、本来の肉や魚とほぼ変わらないのに安くてヘルシーなイメージ	1	3	0	0	0	0	2	2	1	1	1	2	2	1	2	6	5	3	5	3	5	2	5	2	5	5	3	6	3	5	1
113	0	1	0	1	3	わからない	1	3	0	0	0	0	1	3	2	3	3	3	3	1	3	2	7	5	4	4	5	5	2	3	6	6	5	4	5	4	1
114	0	1	1	1	3	健康	1	1	0	0	0	0	1	2	1	1	1	2	2	1	7	2	2	7	2	6	2	6	6	7	6	7	6	7	7	7	2
115	0	1	1	4	1	分からない	3	3	0	0	0	0	1	1	1	1	2	2	2	2	4	4	4	4	4	4	4	4	4	4	3	4	4	4	4	4	1
116	0	1	0	1	3	よくわからない	1	3	0	0	0	0	1	1	1	2	2	1	1	1	4	3	3	5	4	5	5	5	6	4	5	5	5	5	5	5	1
117	0	1	0	1	4	豆腐	3	3	0	0	0	0	1	2	1	2	3	1	2	2	3	4	4	3	5	3	3	3	5	3	4	5	4	4	3	3	1
118	0	1	1	1	3	低カロリー	1	3	0	0	0	0	1	2	1	1	3	2	2	1	4	4	4	5	3	4	4	4	5	3	4	4	4	4	2	2	1
119	0	1	1	1	3	大豆ミート	3	3	0	0	0	0	3	3	3	3	3	3	3	3	5	2	4	6	4	4	3	4	6	4	4	6	4	4	2	4	2
120	0	1	1	1	2	大豆ハム グルテンミート	1	2	0	0	0	0	1	2	1	2	2	1	2	2	5	2	6	5	2	5	2	4	6	5	5	3	6	6	6	5	1
121	0	1	1	1	3	ない	3	3	0	0	0	0	2	2	2	2	2	2	2	2	4	4	4	4	4	4	4	4	4	4	4	4	4	4	4	4	2
122	0	1	0	1	4	よくわからない	3	2	0	0	0	0	1	3	3	3	3	3	1	1	6	2	6	2	3	6	1	6	2	5	5	2	4	1	4	3	1
123	0	1	0	1	4	大豆	1	3	0	0	0	0	3	3	1	1	3	3	1	1	1	5	7	2	5	2	6	5	3	2	5	5	3	6	4	3	2
124	0	1	1	1	4	大豆、虫	1	3	0	0	0	0	1	2	2	3	3	2	1	1	3	6	7	2	2	4	5	4	5	1	7	7	7	7	6	7	2
125	0	1	1	1	4	豆	1	1	0	0	0	0	1	2	1	2	1	1	2	2	1	5	4	2	5	4	6	4	1	1	4	4	4	4	4	4	1
126	0	1	0	1	1	大豆で作ったお肉。	1	3	0	0	0	0	1	2	1	1	2	2	2	1	5	4	5	5	2	5	4	5	6	4	6	5	4	5	5	5	3
127	0	1	1	1	3	食糧危機に対応している？	1	3	0	0	0	0	2	2	1	2	2	2	2	1	5	4	5	7	2	6	3	6	6	6	4	3	2	4	4	2	1
128	0	1	0	1	3	環境にやさしい	1	1	0	0	0	0	1	2	2	2	2	2	2	2	4	4	4	5	4	7	4	1	4	4	4	4	4	4	4	4	1
129	0	1	0	1	3	大豆	1	1	0	0	0	0	1	2	1	2	3	2	3	3	4	2	5	5	3	3	6	5	6	5	5	4	4	4	4	3	2
130	0	1	0	1	4	あまり良くないイメージ	3	3	0	0	0	0	1	2	1	2	2	1	2	2	2	4	4	1	7	2	7	3	6	1	7	2	2	7	4	4	3
131	0	1	0	5	4	なし	3	3	0	0	0	0	1	2	1	1	3	2	2	1	4	4	5	4	4	4	5	4	5	4	4	4	5	4	4	4	1
132	0	1	0	1	2	豆腐	1	3	0	0	0	0	1	2	1	1	1	2	2	1	3	3	5	6	4	3	5	3	5	3	3	3	3	3	3	1	2
133	0	1	1	4	4	大豆	1	3	0	0	0	0	3	2	3	3	3	3	3	2	4	2	3	5	3	3	4	3	3	3	3	3	3	3	4	6	4
134	0	1	0	1	4	怪しい	3	3	0	0	0	0	1	1	1	2	1	2	2	2	3	3	3	3	3	3	3	3	3	3	3	3	3	3	3	3	2
135	0	1	1	1	4	大豆	3	3	0	0	0	0	3	3	3	3	3	3	3	3	5	4	4	4	4	4	4	4	4	4	5	4	4	3	4	4	1
136	0	1	0	1	3	大豆を使っていそう	1	2	0	0	0	0	1	2	1	2	2	1	2	2	1	4	3	4	5	3	5	2	3	2	4	4	4	4	4	4	1
137	0	1	0	1	4	美味しいか不安	1	1	0	0	0	0	2	2	1	1	1	2	1	3	2	5	3	2	2	1	1	1	5	4	4	5	5	6	4	5	2
138	0	1	1	1	1	大豆ミート	2	1	0	0	0	0	2	1	1	1	2	2	2	1	4	3	2	5	5	5	6	2	3	2	3	2	4	1	2	2	2
139	0	1	1	1	2	大豆ミート	1	3	0	0	0	0	1	3	2	1	3	3	3	2	3	4	5	2	2	2	7	4	4	1	5	4	4	6	5	4	2
140	0	1	0	1	3	大豆	1	1	0	0	0	0	1	2	1	2	2	2	2	2	2	5	6	4	5	5	5	5	3	2	5	4	3	5	5	2	2
141	0	1	0	1	4	わからない	3	3	0	0	0	0	1	2	1	2	2	1	2	2	2	6	4	2	6	3	6	5	3	3	5	5	5	5	3	3	2
142	0	1	1	1	1	聞いたことがありません	3	3	0	0	0	0	3	3	3	3	3	3	3	3	1	5	6	7	3	2	6	7	7	5	7	7	6	6	6	6	1
143	0	1	0	1	3	あまり美味しそうではない	3	3	0	0	0	0	1	1	1	1	1	2	2	1	2	5	5	4	5	3	5	5	4	2	5	5	5	6	4	3	1
144	0	1	1	1	1	大豆ミート	1	3	0	0	0	0	1	2	1	2	1	1	2	1	2	4	5	2	5	2	5	5	1	2	5	2	2	2	2	2	1
145	0	1	1	1	2	健康的な	1	3	0	0	0	0	3	2	1	1	1	2	2	1	4	4	4	5	5	4	3	5	5	3	3	3	3	3	2	3	2
146	0	1	0	1	3	大豆ミート	1	1	0	0	0	0	1	2	1	2	2	2	2	1	3	5	5	5	2	2	6	4	3	5	4	3	3	2	3	4	1
147	0	1	0	1	3	大豆	1	3	0	0	0	0	1	2	1	2	2	1	2	2	3	4	5	5	4	4	5	5	3	3	6	5	4	5	5	5	3
148	0	1	0	1	3	味のこだわりしだい	2	2	0	0	0	0	3	3	3	3	3	3	3	3	4	4	4	4	4	4	4	4	4	4	4	4	4	4	4	4	2
149	0	1	1	1	1	大豆ミート	1	3	0	0	0	0	1	2	1	2	1	1	2	2	2	4	5	5	4	3	5	4	3	4	5	2	4	5	5	3	2
150	0	1	0	1	4	大豆肉	1	3	0	0	0	0	2	2	1	1	1	2	2	1	3	5	5	5	5	3	5	4	5	5	5	4	5	5	4	3	2
151	0	1	0	2	2	あ	1	1	0	0	0	0	2	2	2	2	2	2	1	1	5	7	6	7	7	7	6	6	6	6	7	6	5	7	4	4	2
152	0	1	1	1	4	美味しくなさそう	3	3	0	0	0	0	1	2	1	2	2	1	2	2	3	5	6	3	6	2	6	5	2	2	5	4	4	5	5	4	2
153	0	1	1	1	1	ヘルシー	1	3	0	0	0	0	1	2	2	2	2	2	2	1	2	3	6	5	2	2	6	5	3	6	5	5	5	5	5	6	4
154	0	1	1	1	1	野菜	1	3	0	0	0	0	3	3	3	3	3	3	3	3	4	4	4	4	4	4	4	4	4	4	4	4	4	4	4	4	1
155	0	1	0	5	4	まずい	2	2	0	0	0	0	2	2	2	2	1	2	2	2	6	6	3	5	2	4	4	5	3	5	4	4	3	4	4	5	2
156	0	1	1	1	1	大豆ミート	1	3	0	0	0	0	1	2	2	2	1	2	1	1	4	2	5	5	4	4	5	4	5	4	5	5	4	4	4	4	3
157	0	1	0	1	3	ない	3	3	0	0	0	0	3	3	3	3	3	3	3	1	4	4	3	4	4	4	3	4	5	5	3	4	4	4	3	4	3
158	0	1	1	2	1	大豆	1	1	0	0	0	0	3	3	3	3	3	3	3	3	4	5	5	4	4	4	4	5	4	4	3	4	4	3	3	3	1
159	0	1	0	2	2	なし	3	3	0	0	0	0	1	1	1	2	1	1	2	2	4	4	4	4	4	4	4	4	4	4	4	4	4	4	4	4	1
160	0	1	0	1	4	大豆	1	1	0	0	0	0	3	3	3	3	3	3	3	3	3	4	4	4	4	4	4	4	4	4	4	4	4	4	4	4	1
161	0	1	0	1	3	特に思いつかない	1	1	0	0	0	0	1	1	2	1	2	2	1	1	5	2	3	7	4	7	2	6	5	4	3	5	5	6	5	5	2
162	0	1	1	1	4	大豆を使用している	1	3	0	0	0	0	1	2	1	2	2	1	2	2	2	2	6	1	6	2	6	4	2	2	4	4	3	3	5	4	3
163	0	1	1	1	3	肉の代わりのもの	1	3	0	0	0	0	1	2	1	1	1	2	2	1	3	4	7	5	4	5	5	6	6	4	5	4	5	4	3	4	1
164	0	1	0	1	3	新しい食べ物	3	3	0	0	0	0	1	2	2	1	2	1	1	2	3	3	5	6	2	3	3	4	2	2	2	2	3	3	4	6	1
165	0	1	0	1	1	植物性の原料から作られた食べ物	1	1	0	0	0	0	2	1	2	1	2	2	1	1	6	1	3	5	5	6	3	5	5	6	6	5	6	7	6	5	2
166	0	1	1	1	2	大豆	2	2	0	0	0	0	3	2	1	1	2	2	2	1	2	2	2	2	2	3	4	4	4	4	3	3	4	5	4	4	2
167	0	1	1	1	4	体に悪い	2	2	0	0	0	0	3	2	1	2	3	2	2	2	5	3	4	5	4	3	4	1	5	6	6	1	3	6	3	6	2
168	0	1	0	1	1	意外と肉っぽいけど肉と比べると物足りない	1	3	0	0	0	0	1	2	1	2	2	1	2	1	5	4	3	6	2	1	3	4	5	6	5	4	4	7	5	5	1
169	0	1	0	1	3	大豆	1	3	0	0	0	0	1	1	2	2	1	1	2	1	3	3	5	6	4	6	5	2	5	5	4	2	3	2	6	6	1
170	0	1	1	1	3	だいたいひん	1	3	0	0	0	0	2	2	1	1	2	2	2	1	3	3	5	7	3	3	4	4	6	7	4	4	4	4	4	4	1
171	0	1	1	1	3	わからない	3	3	0	0	0	0	1	2	2	2	2	2	1	1	5	2	5	6	4	6	2	4	5	4	4	3	5	4	3	3	1
172	0	1	0	1	2	なひ	1	1	0	0	0	0	1	1	2	1	1	1	2	2	3	2	2	2	2	1	1	2	3	3	2	2	6	3	1	3	2
173	0	1	0	1	4	環境に優しい	3	3	0	0	0	0	1	2	1	2	2	1	2	2	1	3	3	3	3	2	5	2	5	3	5	5	5	5	6	3	1
174	0	1	0	1	4	特になし	3	1	0	0	0	0	3	3	3	3	3	3	3	3	4	5	5	4	3	4	5	5	3	3	4	5	4	5	4	5	1
175	0	1	1	1	3	ヘルシー 値段が高い	1	3	0	0	0	0	2	2	1	1	2	2	2	1	2	3	2	6	1	5	2	1	6	3	3	1	2	5	3	1	2
176	0	1	1	4	3	だいず	3	2	0	0	0	0	3	2	3	2	1	2	3	2	5	3	5	4	4	4	4	2	4	3	3	2	5	4	4	5	3
177	0	1	1	1	4	とくになし	3	3	0	0	0	0	1	3	2	2	3	2	3	3	4	4	5	4	4	4	5	5	2	3	5	5	5	5	5	4	1
178	0	1	1	1	1	大豆ミート	1	3	0	0	0	0	1	2	1	1	2	2	2	1	3	4	5	2	5	3	5	3	2	4	5	4	3	5	3	4	1
179	0	1	0	4	4	大豆	1	2	0	0	0	0	3	3	3	3	3	3	3	3	2	2	6	1	6	1	6	1	6	1	1	1	1	1	1	1	1
180	0	1	0	3	3	sdgs	2	2	0	0	0	0	3	1	2	3	1	2	1	1	2	1	1	6	7	3	3	5	4	6	3	1	2	3	1	4	4
181	0	1	1	1	1	大豆	1	3	0	0	0	0	1	2	1	2	1	2	2	1	2	6	7	3	4	2	7	4	5	4	7	5	5	7	4	4	1
182	0	1	1	1	4	特になし	3	3	0	0	0	0	1	2	1	2	2	1	2	2	3	4	5	4	3	3	5	4	4	4	5	4	4	4	4	4	1
183	0	1	1	1	4	ない	2	3	0	0	0	0	3	2	3	3	2	1	2	2	6	4	2	5	2	4	2	5	1	4	5	1	5	4	5	3	1
184	0	1	1	1	2	本物に近いけどすごく似てる訳では無い	1	3	0	0	0	0	3	3	3	3	3	3	3	3	3	4	4	3	5	3	6	6	5	3	4	4	5	5	5	4	2
185	0	1	0	1	4	特になし	3	3	0	0	0	0	3	3	3	3	3	3	3	3	4	4	4	4	4	4	4	4	4	4	4	4	4	4	4	4	2
186	0	1	1	1	1	大豆を使った製品	1	3	0	0	0	0	1	2	2	2	2	1	2	2	3	6	7	5	4	2	7	5	5	3	5	4	3	5	3	4	2
187	0	1	1	1	3	大豆	3	3	0	0	0	0	3	3	3	3	3	3	3	3	2	5	6	5	5	2	6	4	2	1	4	4	4	5	4	3	1
188	0	1	0	1	4	わからない	3	3	0	0	0	0	3	3	3	3	3	3	3	3	4	4	4	4	4	4	4	4	4	4	4	4	4	4	4	4	1
189	0	1	0	2	2	なし	2	2	0	0	0	0	1	1	1	1	1	1	3	2	4	2	2	4	2	3	3	4	2	3	4	3	3	3	3	2	2
190	0	1	1	1	3	特になし	3	3	0	0	0	0	3	3	3	3	3	3	3	3	4	4	4	4	4	4	4	4	4	4	4	4	4	4	4	4	1
191	0	1	0	1	4	わからない	3	3	0	0	0	0	1	2	3	3	3	3	3	3	4	5	4	4	4	4	4	4	4	4	4	4	4	4	4	4	1
192	0	1	1	4	3	ヘルシー	3	3	0	0	0	0	1	1	1	1	1	1	1	1	4	4	4	4	4	4	4	4	4	4	4	4	4	4	4	4	2
193	0	1	0	1	1	大豆	1	3	0	0	0	0	3	3	3	3	3	3	3	3	2	6	4	5	4	4	4	3	5	4	3	5	5	4	3	3	1
194	0	1	1	1	1	ソイミート	1	1	0	0	0	0	3	3	3	3	1	3	2	3	5	4	7	7	4	7	5	7	7	7	7	7	5	7	6	5	1
195	0	1	1	1	1	大豆のミート	3	3	0	0	0	0	1	3	3	3	3	3	3	3	4	5	7	5	6	5	6	4	3	2	4	3	3	5	4	4	3
196	0	1	0	1	4	美味しくなさそう	1	3	0	0	0	0	1	2	1	2	1	1	2	2	1	5	4	3	3	3	5	4	6	2	3	3	3	5	3	4	1
197	0	1	1	1	1	ビーガン 大豆	1	3	0	0	0	0	1	2	1	2	1	1	2	2	3	3	3	5	3	4	5	7	4	4	5	5	5	6	5	4	1
198	0	1	0	1	3	なし	3	3	0	0	0	0	3	3	3	3	3	3	3	3	4	5	4	5	4	5	5	4	4	5	6	4	4	4	5	4	2
199	0	1	1	1	3	大豆	3	3	0	0	0	0	1	2	1	1	1	2	2	1	4	3	4	6	4	5	3	5	5	4	2	5	4	4	4	4	1
200	0	1	0	2	3	大豆肉	1	3	0	0	0	0	2	3	3	3	3	3	3	3	4	4	3	4	4	4	4	4	4	4	4	4	4	4	4	4	1
201	0	1	0	1	2	パサパサしている	1	3	0	0	0	0	1	2	1	1	1	1	1	2	6	7	5	6	3	7	6	6	6	6	6	5	5	6	6	7	1
202	0	1	0	1	1	大豆	1	3	0	0	0	0	3	3	3	3	3	3	3	3	4	4	4	4	4	4	4	4	4	4	4	4	4	4	4	4	4
203	0	1	0	1	1	野菜肉	1	1	0	0	0	0	1	2	1	1	1	2	2	1	3	6	5	4	5	4	5	1	5	4	6	3	2	5	2	3	1
204	0	1	0	1	2	大豆、ソーセージ	1	3	0	0	0	0	1	2	1	2	1	2	2	2	5	2	5	6	5	6	2	2	6	5	2	2	2	2	2	2	2
205	0	1	1	1	1	大豆ミート	1	3	0	0	0	0	2	2	1	1	2	2	2	1	5	5	3	3	5	3	4	6	3	3	2	2	3	3	4	3	2
206	0	1	0	1	4	特にない	3	3	0	0	0	0	3	3	3	3	3	3	3	3	4	5	4	4	4	4	4	4	4	4	4	4	4	4	4	4	2
207	0	1	0	1	3	体にいい	3	3	0	0	0	0	1	2	1	1	2	2	2	1	5	5	5	3	7	3	7	3	4	4	4	3	3	4	3	4	1
208	0	1	0	1	1	品質が安定している	1	1	0	0	0	0	1	2	2	2	1	2	2	2	5	2	4	7	1	7	1	7	7	7	5	5	5	7	6	4	4
209	0	1	1	4	4	わからない	1	3	0	0	0	0	3	3	3	3	3	3	3	3	4	3	3	6	4	4	2	7	4	3	6	6	6	4	5	6	4
210	0	1	1	1	4	特になし	1	3	0	0	0	0	1	2	1	2	1	3	3	3	3	5	4	4	4	3	4	5	5	2	4	5	5	5	3	3	2
211	0	1	0	1	3	美味しそう ダイエットに良さそう	3	3	0	0	0	0	3	2	1	1	1	2	2	1	1	7	7	1	7	1	7	7	1	1	1	1	7	7	7	7	1
212	0	1	0	1	1	大豆ミート	1	3	0	0	0	0	1	2	1	1	2	2	1	1	5	2	2	5	4	6	4	5	6	3	5	4	4	5	4	3	2
213	0	1	1	3	4	分からない	2	2	0	0	0	0	2	2	1	3	1	2	2	2	4	1	3	4	6	2	2	3	4	1	1	3	5	6	2	1	1
214	0	1	0	1	3	大豆ミート	1	1	0	0	0	0	1	2	1	1	2	2	2	1	3	4	5	4	3	3	5	4	5	4	5	5	5	6	5	5	1
215	0	1	0	1	3	謎肉	1	3	0	0	0	0	3	2	1	2	2	2	2	3	5	3	5	1	4	5	5	7	5	3	5	5	5	7	4	5	2
216	0	1	0	1	1	大豆ミート	1	1	0	0	0	0	2	2	2	1	2	1	1	1	4	2	2	4	4	5	4	4	3	3	5	5	5	5	5	6	2
217	0	1	0	1	4	体に悪そう	3	3	0	0	0	0	1	2	1	2	3	1	2	2	1	3	6	3	3	4	4	3	3	3	5	3	2	2	2	1	1
218	0	1	0	1	1	大豆ミート	1	2	0	0	0	0	1	2	3	2	3	3	2	1	3	3	3	2	4	3	3	4	3	3	5	3	3	3	3	3	3
219	0	1	0	1	1	肉	3	3	0	0	0	0	1	2	1	1	2	2	2	1	4	4	4	5	4	4	4	4	5	4	4	4	4	4	4	4	2
220	0	1	1	1	3	大豆ミート	1	3	0	0	0	0	1	2	1	1	2	1	2	1	1	4	5	6	4	4	6	3	5	4	6	5	4	4	5	3	1
221	0	1	1	1	2	はたけのおにく	3	3	0	0	0	0	3	3	3	3	3	3	3	3	4	4	4	4	4	4	4	4	4	4	4	4	4	4	4	4	2
222	0	1	1	1	3	特にない	1	3	0	0	0	0	3	2	1	1	3	3	3	3	3	4	4	4	4	4	2	3	3	4	4	4	4	4	5	5	1
223	0	1	0	1	4	分からない	3	3	0	0	0	0	3	3	3	3	3	3	3	3	4	4	4	4	4	3	5	7	5	4	7	7	4	4	1	4	1
224	0	1	0	1	4	特にない	3	3	0	0	0	0	3	3	3	3	3	3	3	3	4	4	4	4	4	4	4	4	4	4	4	4	4	4	4	4	1
225	0	1	0	1	1	大豆	1	3	0	0	0	0	1	2	1	1	1	2	2	1	3	3	2	6	1	4	4	3	5	5	3	2	4	2	1	4	2
226	0	2	1	2	2	大豆	1	1	0	0	0	0	1	1	1	1	2	1	2	1	2	5	2	2	2	2	2	2	2	1	3	2	2	2	2	2	2
227	0	2	1	1	3	大豆ミート	3	3	0	0	0	0	3	3	3	3	3	3	3	3	2	4	6	4	5	2	5	5	4	4	4	4	4	4	4	4	2
228	0	2	0	1	3	大豆から作られた人工の肉	1	1	0	0	0	0	2	2	2	2	2	1	1	1	3	5	5	5	5	3	5	3	3	3	6	5	6	5	6	6	1
229	0	2	0	1	2	味が人工的	1	2	0	0	0	0	1	2	2	2	1	2	1	1	4	4	2	6	5	4	5	4	4	4	3	4	4	4	4	5	3
230	0	2	0	1	3	だいずみーと	1	1	0	0	0	0	1	1	1	1	2	2	2	1	4	5	3	3	4	6	5	4	2	7	4	5	3	3	4	3	2
231	0	2	0	1	3	昆虫	3	3	0	0	0	0	3	3	3	3	3	3	3	3	4	4	4	4	4	4	4	4	4	4	4	4	4	4	4	4	1
232	0	2	1	1	1	肉と変わらず、普通に美味しい	1	1	0	0	0	0	1	1	2	1	1	1	2	1	7	2	3	6	2	6	1	5	4	6	5	7	6	6	5	4	3
233	0	2	1	1	3	大豆ミート	1	3	0	0	0	0	1	1	2	2	2	2	1	1	3	5	6	5	3	3	5	3	5	5	3	5	5	5	4	3	2
234	0	2	1	1	3	かえる	3	3	0	0	0	0	1	1	2	1	2	1	2	1	4	2	4	5	4	4	5	4	2	4	5	4	4	4	4	4	2
235	0	2	1	1	1	ダイエットに良さそう	3	3	0	0	0	0	1	1	2	2	1	2	2	1	1	7	7	5	2	1	7	1	1	4	6	6	6	6	6	4	3
236	0	2	0	1	4	特にありません	3	3	0	0	0	0	1	2	2	1	2	2	2	2	4	4	4	4	4	4	4	4	4	4	4	4	4	4	4	4	1
237	0	2	1	4	4	や	3	3	0	0	0	0	1	2	3	2	2	3	1	1	4	4	5	4	5	3	5	3	5	3	4	6	5	5	3	4	2
238	0	2	0	5	4	分からない	3	3	0	0	0	0	3	3	3	3	3	3	3	3	4	4	4	4	4	4	4	4	4	4	4	4	4	4	4	4	1
239	0	2	1	5	4	なし	3	3	0	0	0	0	1	1	2	2	1	1	3	3	4	4	4	4	4	4	3	5	4	4	4	5	5	4	4	4	2
240	0	2	1	1	2	美味しいのか不安	3	3	0	0	0	0	1	1	2	2	2	2	1	1	2	3	5	5	5	6	6	3	3	2	4	2	4	3	3	4	1
241	0	2	1	1	1	大豆ミーツ	3	3	0	0	0	0	1	3	3	3	3	3	3	3	4	2	3	2	4	6	2	2	5	4	2	5	6	4	5	5	2
242	0	2	0	3	3	なし	2	2	0	0	0	0	2	2	3	1	2	1	2	3	5	5	1	2	4	5	2	5	7	2	5	4	5	5	5	4	3
243	0	2	0	4	4	なし	2	2	0	0	0	0	3	3	3	3	3	3	3	3	6	4	2	2	4	4	4	3	2	2	5	2	4	5	3	5	1
244	0	2	0	1	1	カラダに優しい	1	2	0	0	0	0	1	2	1	2	2	1	2	1	2	3	5	6	6	4	6	5	4	5	4	6	5	5	4	4	1
245	0	2	1	3	1	肉が嫌いでも食べられる	1	1	0	0	0	0	2	3	1	2	3	3	3	1	4	5	6	4	3	4	5	5	2	4	5	5	5	5	5	5	2
246	0	2	1	1	4	分からない	3	3	0	0	0	0	3	3	3	3	3	3	3	3	4	4	7	4	4	4	5	4	5	4	4	4	4	4	4	4	2
247	0	2	0	1	1	加工？？だから満腹感が得られる	2	2	0	0	0	0	1	1	2	2	2	1	1	2	3	3	7	5	5	1	7	4	5	3	7	7	1	1	4	4	1
248	0	2	1	3	3	よき	2	2	0	0	0	0	3	3	3	3	2	3	3	3	6	4	2	3	4	2	4	1	4	1	5	4	3	4	3	4	3
249	0	2	1	1	4	人工的	3	3	0	0	0	0	1	1	1	1	1	1	1	1	2	3	3	2	4	4	3	3	4	3	3	4	4	5	4	3	2
250	0	2	1	1	3	豆を使ったお肉のような食べ物	1	2	0	0	0	0	2	1	2	2	1	1	1	1	6	2	3	7	2	6	2	3	6	6	3	2	3	3	2	3	2
251	0	2	1	1	2	豆でできた肉	1	1	0	0	0	0	1	1	2	2	2	2	1	1	2	3	4	3	4	3	5	3	4	3	3	3	2	2	2	2	1
252	0	2	1	1	4	大豆	1	1	0	0	0	0	1	1	1	1	1	1	1	1	4	3	3	3	3	3	3	3	3	3	3	3	3	3	3	3	1
253	0	2	1	1	4	美味しくなさそう	1	3	0	0	0	0	1	1	2	1	1	2	1	1	3	4	4	5	5	5	4	4	6	4	2	4	4	4	4	4	1
254	0	2	1	1	2	大豆ミート	1	2	0	0	0	0	1	1	2	1	1	1	1	1	4	2	2	2	4	3	7	5	1	1	3	3	5	5	3	3	1
255	0	2	0	1	3	なし	3	3	0	0	0	0	1	1	1	1	1	1	1	1	4	4	4	4	4	4	4	4	4	4	4	4	4	4	4	4	2
256	0	2	0	1	2	コオロギ	1	3	0	0	0	0	1	1	1	1	2	1	1	1	5	5	5	3	6	3	6	6	2	2	3	2	2	2	2	2	2
257	0	2	0	1	4	まずい	1	3	0	0	0	0	1	1	2	3	2	2	1	3	1	5	5	3	4	2	7	5	2	1	5	2	1	6	2	1	2
258	0	2	0	1	4	植物をメインにした肉	3	3	0	0	0	0	1	1	2	1	1	2	1	1	2	6	5	2	5	2	6	3	5	3	3	3	3	2	2	3	1
259	0	2	1	1	1	大豆	1	3	0	0	0	0	3	1	2	3	3	3	2	3	2	5	6	6	6	3	6	5	2	2	5	5	5	5	5	5	2
260	0	2	1	1	1	大豆	1	1	0	0	0	0	2	1	2	1	1	1	2	1	7	1	4	7	1	7	3	7	5	7	6	5	5	6	5	4	4
261	0	2	0	1	1	こんにゃく	1	3	0	0	0	0	1	1	2	1	2	1	1	2	4	3	5	6	4	5	3	3	6	4	5	3	3	4	4	4	1
262	0	2	1	1	3	豆類を使う	1	3	0	0	0	0	2	1	1	1	1	1	1	1	6	2	2	2	2	6	2	2	6	5	6	3	6	2	2	2	2
263	0	2	0	1	3	大豆ミート	1	3	0	0	0	0	1	1	2	1	1	2	2	2	3	4	5	6	3	4	4	3	5	2	5	4	4	5	5	5	2
264	0	2	1	1	1	大豆ミート	1	3	0	0	0	0	2	1	2	1	1	1	1	1	3	5	5	6	5	5	3	3	5	3	3	2	2	2	2	3	2
265	0	2	1	1	4	分からない	3	3	0	0	0	0	1	1	2	1	2	2	2	2	1	7	7	1	6	1	7	4	2	2	5	5	5	3	3	3	1
266	0	2	1	1	3	わからない	3	3	0	0	0	0	1	1	1	1	1	2	3	1	4	1	7	5	5	5	4	3	3	4	7	3	4	4	2	3	1
267	0	2	1	1	2	大豆	1	3	0	0	0	0	1	1	2	2	1	2	2	3	3	4	5	7	1	6	3	5	7	7	5	5	4	6	5	4	1
268	0	2	0	1	4	まずそう	3	3	0	0	0	0	3	3	3	3	3	3	3	3	2	4	4	5	3	4	4	5	5	5	4	4	4	4	4	4	3
269	0	2	0	1	3	大豆などを使った製品	1	2	0	0	0	0	1	1	2	2	2	2	1	2	5	2	4	5	4	3	5	5	3	4	6	5	5	5	5	5	1
270	0	2	1	1	4	分からない	1	2	0	0	0	0	1	3	2	2	1	2	1	2	5	5	3	4	4	4	5	3	5	5	5	5	5	5	3	3	1
271	0	2	1	1	3	食感が違いそう	1	1	0	0	0	0	2	1	2	2	2	1	1	1	6	2	6	6	2	6	2	5	6	6	6	6	6	6	6	6	2
272	0	2	0	1	3	人工的	1	1	0	0	0	0	1	1	2	1	1	1	1	1	4	3	5	6	3	5	5	3	5	5	5	5	6	5	5	5	2
273	0	2	0	1	4	大豆ミート	1	3	0	0	0	0	1	1	2	3	2	2	1	3	3	6	4	5	5	3	5	4	6	3	3	2	4	4	5	3	1
274	0	2	0	1	4	分からない	3	3	0	0	0	0	3	3	3	3	3	3	3	3	4	4	4	3	3	3	1	4	3	2	6	6	7	7	3	4	1
275	0	2	1	1	4	肉のような物	1	2	0	0	0	0	2	1	3	2	3	1	2	3	1	4	7	6	5	1	7	5	1	1	5	5	4	6	3	4	2
276	0	2	0	1	3	環境対策	1	1	0	0	0	0	1	3	3	3	3	3	3	3	5	4	4	4	4	4	4	4	4	4	4	4	4	4	5	4	2
277	0	2	0	1	4	テレビでやってたくらい	3	3	0	0	0	0	3	3	3	3	3	3	3	3	4	4	4	4	4	4	4	4	4	4	4	4	4	4	4	4	1
278	0	2	0	1	3	大豆ミート	1	3	0	0	0	0	1	2	1	1	2	2	2	2	4	3	4	4	4	4	4	5	3	5	1	2	1	2	3	3	3
279	0	2	1	5	1	大豆ミート	1	3	0	0	0	0	1	1	2	1	1	1	2	2	3	2	5	4	4	5	5	4	5	4	7	7	7	7	6	5	1
280	0	2	1	1	3	大豆ミート	1	3	0	0	0	0	1	1	2	2	2	2	1	1	3	3	5	5	4	3	6	3	5	4	5	5	4	5	4	4	2
281	0	2	1	1	4	なし	3	3	0	0	0	0	3	3	3	3	3	3	3	3	1	1	1	1	1	1	1	1	1	1	1	1	1	1	1	1	1
282	0	2	0	1	3	大豆の様な植物由来のタンパク質を使っている。	1	1	0	0	0	0	1	1	2	2	1	2	1	1	3	5	5	5	3	3	5	5	5	4	5	5	5	5	5	5	3
283	0	2	1	1	2	オートミール	3	3	0	0	0	0	1	1	1	1	2	2	1	2	1	1	5	6	2	6	6	1	6	3	6	3	3	5	1	4	2
284	0	2	0	1	4	あ	3	3	0	0	0	0	3	3	3	3	3	3	3	3	4	4	4	4	4	4	4	4	4	4	4	4	4	4	4	4	1
285	0	2	1	4	1	大豆のお肉	1	3	0	0	0	0	1	1	2	1	1	1	1	1	5	2	3	6	4	4	4	3	7	4	4	4	5	3	3	2	2
286	0	2	1	3	3	ない	1	1	0	0	0	0	2	2	2	2	2	1	2	1	4	1	3	2	5	4	5	4	5	4	4	5	4	4	2	4	2
287	0	2	1	1	4	特になし。	3	3	0	0	0	0	1	1	2	2	2	2	1	1	1	1	1	1	1	1	5	1	7	1	1	1	1	1	1	1	1
288	0	2	0	1	3	大豆	1	3	0	0	0	0	2	1	2	1	2	1	1	1	2	2	2	5	2	6	5	3	7	5	1	1	1	2	4	3	2
289	0	2	0	1	2	大豆肉	1	3	0	0	0	0	2	1	2	1	2	1	1	1	2	3	6	2	4	3	5	5	5	5	5	5	5	5	5	5	2
290	0	2	0	1	1	特になし	1	2	0	0	0	0	3	3	3	3	3	3	3	3	3	3	3	3	3	3	3	3	3	3	2	2	3	4	3	2	2
291	0	2	0	1	3	大豆	1	1	0	0	0	0	2	1	2	2	1	1	1	1	3	2	5	6	2	4	3	2	5	5	5	4	5	5	4	5	2
292	0	2	1	1	3	大豆ミート	2	1	0	0	0	0	1	2	1	2	2	1	2	2	5	5	5	5	3	4	5	5	5	4	5	4	5	5	4	5	3
293	0	2	0	1	1	大豆やおからでできたハンバーグ。	1	1	0	0	0	0	1	2	2	1	2	1	2	1	5	4	5	6	4	6	5	6	5	4	5	3	2	4	3	4	1
294	0	2	0	1	3	大豆ミートなど植物由来の肉	1	3	0	0	0	0	1	1	2	2	2	2	2	1	5	5	5	2	5	3	5	4	6	4	5	4	3	5	5	3	1
295	0	2	0	1	4	安っぽい	1	2	0	0	0	0	1	2	1	1	2	2	1	2	3	5	6	4	5	5	4	5	4	4	3	2	3	4	3	2	2
296	0	2	0	1	4	植物からできた肉	1	3	0	0	0	0	1	1	2	3	1	2	1	1	5	4	7	6	3	4	3	5	6	4	6	5	5	4	6	4	2
297	0	2	1	1	3	ヴィーガン	1	3	0	0	0	0	3	1	2	2	1	3	2	1	4	4	3	2	2	4	3	3	3	3	3	2	4	3	3	3	1
298	0	2	1	4	3	し	2	2	0	0	0	0	2	2	2	2	2	2	1	1	5	6	2	4	4	3	4	4	6	3	5	2	4	5	2	3	2
299	0	2	0	1	3	分からない	3	3	0	0	0	0	1	1	1	1	1	1	1	1	3	3	3	4	4	4	4	4	2	4	3	4	3	4	4	4	1
300	0	2	0	1	1	大豆	1	3	0	0	0	0	3	3	3	1	3	3	1	1	4	3	5	7	1	7	1	5	6	7	5	5	5	3	2	1	4
301	0	2	0	2	4	わからない	3	3	0	0	0	0	3	3	3	3	3	3	3	3	4	4	4	4	4	4	4	4	4	4	4	4	4	4	4	4	1
302	0	2	1	1	3	植物性、体に良さそう	1	3	0	0	0	0	1	1	2	3	2	3	2	1	4	4	4	4	5	4	5	5	5	2	5	5	4	5	4	4	2
303	0	2	0	1	4	わからん	1	2	0	0	0	0	2	2	1	1	1	2	2	2	3	4	1	4	2	3	4	4	4	4	3	3	7	2	1	3	3
304	0	2	1	1	3	大豆ミート	3	1	0	0	0	0	2	1	2	2	2	2	1	1	3	2	5	6	3	3	4	3	6	3	3	2	2	3	2	3	3
305	0	2	0	1	4	大豆	1	3	0	0	0	0	1	1	2	2	1	2	2	1	3	4	5	2	6	2	5	4	4	1	5	4	4	4	4	4	2
306	0	2	0	1	1	大豆ミート	1	1	0	0	0	0	1	3	1	1	1	1	1	2	2	5	1	2	3	3	5	5	2	5	2	5	5	2	3	5	1
307	0	2	0	1	4	嫌	3	3	0	0	0	0	3	3	2	3	1	3	1	3	2	4	6	5	4	4	5	4	5	4	4	4	4	4	4	4	2
308	0	2	0	1	1	ビヨンドミート	3	3	0	0	0	0	2	1	2	2	1	1	1	1	4	2	3	5	4	5	3	3	6	4	5	5	4	4	4	3	3
309	0	2	0	4	3	かたい	1	2	0	0	0	0	1	2	2	1	2	2	2	2	5	3	3	4	4	4	4	5	4	3	4	3	4	4	4	4	3
310	0	2	0	1	4	なし	3	3	0	0	0	0	3	3	3	3	3	3	3	2	4	4	4	4	4	4	4	4	4	4	4	4	4	4	4	4	1
311	0	2	1	1	3	健康的	1	3	0	0	0	0	1	1	2	1	1	1	2	1	2	5	6	5	5	1	7	5	2	1	5	2	2	5	2	2	1
312	0	2	1	1	3	大豆ミート	1	3	0	0	0	0	1	1	2	2	1	2	1	1	6	2	6	6	3	6	2	5	6	5	5	5	5	4	5	4	1
313	0	2	0	1	4	特になし	3	3	0	0	0	0	1	1	1	1	1	1	1	2	4	4	3	4	4	3	5	3	3	4	7	4	4	6	4	4	1
314	0	2	0	1	3	分からない	1	1	0	0	0	0	3	3	3	3	3	3	2	2	5	6	4	4	2	5	3	4	5	4	5	4	4	4	3	4	1
315	0	2	0	1	2	大豆由来	1	3	0	0	0	0	3	3	3	3	3	3	3	3	2	6	7	4	6	2	4	6	3	3	4	4	4	4	4	1	1
316	0	2	0	1	3	手間がかかる	3	3	0	0	0	0	1	1	1	1	1	2	2	1	5	4	7	4	5	5	4	5	4	4	3	1	1	2	3	1	1
317	0	2	1	1	1	大豆ミート	1	3	0	0	0	0	2	1	2	2	1	1	1	1	3	3	7	5	4	3	5	6	3	3	5	5	4	5	5	1	2
318	0	2	1	4	1	大豆肉 大豆ミートスパゲッティ	1	1	0	0	0	0	1	1	1	1	1	1	1	1	7	1	7	5	7	7	7	7	7	7	7	7	7	7	7	7	1
319	0	2	0	1	4	美味しくない	1	3	0	0	0	0	1	1	2	2	1	2	1	1	1	5	2	4	2	2	5	5	3	2	5	4	2	5	2	2	2
320	0	2	0	1	4	大豆 パサパサしてそう	1	3	0	0	0	0	1	1	2	1	2	2	1	3	2	2	4	5	2	1	6	6	3	4	7	4	2	6	3	4	1
321	0	2	0	4	4	なし	3	3	0	0	0	0	3	3	3	3	3	3	3	3	4	4	4	4	4	4	4	4	4	4	4	4	4	4	4	4	2
322	0	2	1	1	1	固い	1	2	0	0	0	0	3	2	2	1	3	3	3	3	4	7	1	5	4	4	6	5	4	3	5	3	3	4	5	3	2
323	0	2	0	2	3	大豆のイメージ	1	3	0	0	0	0	2	1	2	2	2	1	1	1	4	3	4	6	4	5	4	3	4	5	5	5	4	5	4	4	3
324	0	2	1	1	1	だいず	1	1	0	0	0	0	1	2	1	2	1	2	1	2	4	4	4	3	5	6	5	5	6	4	5	4	3	3	3	5	3
325	0	2	1	1	4	豆腐	1	2	0	0	0	0	1	1	2	3	3	1	2	1	2	2	3	1	5	2	5	3	2	2	5	6	5	4	3	3	2
326	0	2	1	1	3	よくわからない	3	3	0	0	0	0	2	1	1	1	2	1	1	1	3	5	5	6	3	4	5	4	5	5	6	5	5	5	4	5	2
327	0	2	0	1	4	美味しくなさそう	3	3	0	0	0	0	1	2	1	1	1	2	2	2	1	6	2	1	1	1	5	1	5	2	1	1	1	1	1	1	2
328	0	2	0	1	1	なし	1	1	0	0	0	0	1	1	1	1	1	1	1	1	5	3	1	2	2	2	4	4	4	3	5	3	2	7	5	4	1
329	0	2	0	1	2	そらそうよやっぱりアレよ	2	2	0	0	0	0	2	1	2	1	2	1	1	1	4	4	5	5	3	3	3	4	4	4	4	4	5	3	4	4	3
330	0	2	1	1	2	肉の代わりに豆腐を使っているもの	3	3	0	0	0	0	1	1	2	1	1	1	1	1	4	3	5	5	4	4	5	4	3	3	5	4	4	5	4	4	1
331	0	2	1	1	3	大豆	3	3	0	0	0	0	3	3	2	1	3	3	2	1	3	3	6	2	4	3	3	5	3	3	5	5	5	5	5	4	1
332	0	2	0	1	2	なし	2	1	0	0	0	0	2	2	2	1	2	1	1	1	5	5	4	5	5	5	4	5	3	5	5	7	4	4	5	6	3
333	0	2	1	1	4	代替肉という言葉をあまり聞いたことがない	3	3	0	0	0	0	1	1	2	1	1	3	1	3	4	4	4	4	4	4	4	4	4	4	4	4	4	4	4	4	2
334	0	2	0	1	4	なし	3	3	0	0	0	0	1	1	2	3	2	2	1	1	6	4	4	4	4	2	4	2	4	4	4	5	2	4	6	5	2
335	0	2	1	1	4	分からない	3	3	0	0	0	0	1	1	2	1	1	2	1	1	3	5	5	3	4	3	6	4	4	3	5	4	3	4	3	4	1
336	0	2	0	1	4	まずい、不自然、値段が高い	3	1	0	0	0	0	1	1	2	1	1	2	1	2	1	5	6	7	1	1	4	7	7	5	6	6	5	7	7	4	1
337	0	2	1	1	4	鹿	1	1	0	0	0	0	1	3	3	3	3	3	2	3	2	5	6	5	6	4	4	3	5	5	4	5	2	4	5	5	1
338	0	2	1	1	3	肉とは味が大幅に落ちる。	1	3	0	0	0	0	2	1	2	1	1	1	1	1	5	2	6	6	5	3	3	3	5	2	5	4	3	3	3	5	2
339	0	2	0	1	4	何も浮かばない	3	3	0	0	0	0	1	1	2	2	1	2	1	1	5	5	5	2	7	2	7	5	1	1	5	3	3	3	4	3	3
340	0	2	1	1	3	豆腐	3	3	0	0	0	0	3	1	1	1	3	3	1	1	4	5	6	2	2	3	6	6	2	2	5	4	4	4	4	4	2
341	0	2	1	1	4	こわい	3	3	0	0	0	0	1	1	1	1	1	1	1	1	4	3	4	5	4	3	7	4	2	3	4	4	5	3	3	3	1
342	0	2	1	1	3	だいず	1	2	0	0	0	0	1	2	2	1	1	1	1	1	2	3	3	4	3	5	3	3	5	2	5	5	5	6	5	3	1
343	0	2	1	2	2	外国産	1	3	0	0	0	0	2	2	2	2	2	3	2	2	3	5	5	3	6	5	6	5	6	4	4	3	4	4	5	3	2
344	0	2	0	1	2	ジビエ	2	2	0	0	0	0	2	2	2	2	2	2	2	2	2	2	3	3	3	3	3	3	3	3	3	4	3	3	3	3	2
345	0	2	0	1	3	大豆ミート	1	3	0	0	0	0	1	1	2	2	2	2	1	1	5	3	5	5	6	2	6	2	5	3	5	5	2	2	2	2	1
346	0	2	0	4	4	つかない	3	3	0	0	0	0	3	3	3	3	3	3	3	2	5	5	5	4	4	5	4	4	5	5	5	4	4	5	5	3	1
347	0	2	0	4	3	ない	2	2	0	0	0	0	1	1	3	3	2	3	3	3	4	2	5	3	4	3	5	5	2	5	4	5	2	1	4	5	1
348	0	2	1	1	4	代わりに似た食品	2	3	0	0	0	0	1	1	1	1	1	1	1	1	5	3	5	4	4	7	4	7	6	5	5	5	5	5	4	5	2
349	0	2	1	1	3	ハンバーグ	3	3	0	0	0	0	1	1	1	1	1	1	1	1	4	4	4	4	4	4	4	4	4	4	4	4	4	4	4	4	1
350	0	2	0	1	4	カエル	3	3	0	0	0	0	1	1	2	2	1	2	2	1	4	4	4	5	3	4	4	4	4	4	4	4	5	4	5	4	3
351	0	2	0	1	4	おいしくなさそう	3	3	0	0	0	0	1	1	2	1	1	2	1	3	1	5	6	1	6	1	7	4	3	3	1	1	1	1	1	1	2
352	0	2	1	1	4	肉の味がうすそう	3	3	0	0	0	0	2	2	2	1	1	2	1	1	3	4	5	3	5	2	5	5	3	3	5	3	4	3	4	4	2
353	0	2	0	1	4	わからない	3	3	0	0	0	0	1	1	2	3	2	2	2	3	3	4	5	4	5	4	5	4	5	4	5	4	4	4	4	4	2
354	0	2	1	2	2	なし	2	1	0	0	0	0	2	2	2	1	1	1	2	1	3	2	4	4	4	5	4	4	3	4	4	3	5	3	4	3	2
355	0	2	0	1	4	大体肉	3	3	0	0	0	0	3	3	3	3	3	3	3	3	1	7	7	1	7	1	7	4	1	1	4	4	4	7	4	4	1
356	0	2	1	1	1	大豆	1	3	0	0	0	0	3	1	2	1	2	1	1	1	4	4	4	4	4	4	4	6	4	4	4	5	5	4	4	4	1
357	0	2	1	1	3	大豆	1	1	0	0	0	0	3	3	3	3	3	3	3	3	4	3	4	4	4	3	4	6	2	1	4	4	4	4	4	4	1
358	0	2	1	1	3	大豆	3	3	0	0	0	0	3	1	2	2	2	1	1	1	2	4	4	5	4	3	6	5	4	3	4	4	4	5	4	4	2
359	0	2	1	1	3	大豆ミート	3	3	0	0	0	0	1	1	2	1	2	1	1	1	3	3	3	4	3	4	2	5	2	5	4	4	2	6	2	5	2
360	0	2	0	1	2	大豆	1	3	0	0	0	0	1	1	2	1	1	2	1	2	2	5	7	4	3	4	5	3	4	2	6	5	2	6	4	4	1
361	0	2	0	1	2	美味しくない	3	3	0	0	0	0	3	3	3	3	3	3	3	3	3	3	4	2	3	4	5	3	3	4	4	4	3	3	4	5	4
362	0	2	1	1	4	大豆ミート	1	3	0	0	0	0	2	2	2	1	2	1	2	1	3	5	6	4	4	3	5	3	4	3	5	5	4	5	4	5	3
363	0	2	0	1	3	知らん	3	3	0	0	0	0	3	3	3	3	3	3	3	3	2	3	7	2	4	2	7	2	5	4	3	2	2	4	2	1	2
364	0	2	0	1	3	大豆で肉にしたもの	1	2	0	0	0	0	1	1	2	1	1	1	1	1	4	2	5	5	4	2	5	2	3	4	4	2	4	4	2	3	2
365	0	2	1	1	1	大豆ミート	1	1	0	0	0	0	1	1	2	1	1	1	2	1	3	4	6	4	4	4	3	5	5	4	6	5	5	6	5	5	1
366	0	2	0	1	1	「肉のような食べ物」で植物性原料から作られているです。	1	1	0	0	0	0	2	3	3	2	1	1	2	1	7	6	5	6	4	5	2	6	6	5	6	7	5	5	6	5	2
367	0	2	0	1	4	なし	3	3	0	0	0	0	3	3	3	3	3	3	3	3	5	4	5	3	3	4	4	5	4	3	3	4	3	3	4	4	1
368	0	2	0	1	4	まずい	3	3	0	0	0	0	1	2	2	3	2	2	1	3	3	5	7	2	5	3	6	5	3	3	4	2	4	3	4	4	2
369	0	2	1	1	2	ハンバーグ	1	3	0	0	0	0	1	3	2	2	1	2	2	3	2	4	6	3	5	3	5	4	2	3	4	3	3	3	3	3	2
370	0	2	1	1	4	ありません	3	3	0	0	0	0	3	3	3	3	3	3	3	3	4	4	4	4	4	4	4	4	4	4	4	4	4	4	4	4	1
371	0	2	1	1	3	大豆肉	1	3	0	0	0	0	1	1	2	2	2	3	2	1	2	4	4	3	5	2	5	4	4	1	5	4	4	5	4	4	2
372	0	2	0	1	2	特にない	1	3	0	0	0	0	1	1	2	2	1	2	2	1	2	5	7	1	5	1	7	4	2	1	6	6	4	5	4	6	2
373	0	2	1	1	3	大豆	1	3	0	0	0	0	2	1	2	1	1	1	1	1	2	4	5	3	5	2	6	2	5	2	5	4	3	4	2	5	3
374	0	2	1	1	2	はんばーぐ	2	1	0	0	0	0	1	1	2	1	1	1	2	2	4	2	5	6	4	6	5	5	4	3	3	4	6	5	4	4	3
375	0	2	0	1	4	なし	3	3	0	0	0	0	3	3	3	3	3	3	3	3	4	5	4	4	5	4	4	4	3	5	4	5	4	3	4	3	2
376	0	2	1	1	3	大豆ミート	3	3	0	0	0	0	1	2	3	2	1	2	1	1	2	4	4	5	4	5	5	3	6	5	5	5	4	3	4	4	2
377	0	2	0	1	3	雑種の肉	1	3	0	0	0	0	2	1	2	2	2	1	1	1	2	3	3	5	5	4	5	3	5	4	5	3	3	4	3	3	3
378	0	2	1	1	2	まずい	1	3	0	0	0	0	1	1	2	3	2	2	1	3	4	5	4	3	5	3	5	3	3	3	2	3	3	3	4	4	2
379	0	2	1	1	4	お肉の代わりのもの。	1	3	0	0	0	0	1	1	2	1	1	1	1	1	3	5	7	3	7	3	7	6	6	1	6	6	6	5	5	5	2
380	0	2	1	1	4	わからない	3	3	0	0	0	0	1	1	2	3	2	3	3	3	3	3	5	2	6	2	5	4	2	2	5	3	3	4	2	4	1
381	0	2	1	1	3	ヘルシー	1	3	0	0	0	0	1	1	2	1	2	2	1	1	3	3	4	4	4	4	5	5	5	4	5	4	4	5	4	4	3
382	0	2	0	1	3	大豆ミート	1	2	0	0	0	0	1	1	2	1	2	1	1	1	5	3	3	6	2	4	4	6	5	5	5	4	3	3	5	3	4
383	0	2	1	1	3	豆からできたお肉	3	3	0	0	0	0	1	3	2	1	1	3	1	1	3	5	7	5	4	1	6	4	7	3	5	5	5	7	3	5	1
384	0	2	1	1	1	大豆ミート。	1	3	0	0	0	0	2	1	2	1	2	1	1	1	2	3	4	4	3	3	5	5	5	4	4	4	3	3	5	4	1
385	0	2	0	1	3	なし	3	3	0	0	0	0	3	3	3	3	3	3	3	3	4	4	4	4	4	4	4	4	4	4	4	5	4	4	4	4	2
386	0	2	1	1	3	美味しくない	3	3	0	0	0	0	3	3	3	3	3	3	3	3	4	4	4	4	4	4	4	4	4	4	4	4	4	4	4	4	1
387	0	2	1	1	3	ない	1	1	0	0	0	0	1	1	2	1	2	1	1	1	4	4	6	5	2	4	4	2	5	3	7	7	4	3	6	4	3
388	0	2	0	1	4	わからない	3	3	0	0	0	0	3	3	3	3	3	3	3	3	4	4	4	4	4	4	4	4	4	4	4	4	4	4	4	4	1
389	0	2	0	1	3	ハンバーガー	1	3	0	0	0	0	1	2	1	1	1	2	2	2	3	4	5	5	1	5	4	5	4	5	5	5	4	5	5	4	2
390	0	2	1	1	2	大豆	1	3	0	0	0	0	1	1	2	2	2	1	2	1	5	5	5	6	2	5	3	6	6	5	6	6	5	5	5	4	2
391	0	2	1	1	4	安全なお肉なのか分からない	3	3	0	0	0	0	1	1	2	1	1	2	2	1	2	5	7	1	7	1	7	5	1	1	6	3	2	4	2	3	4
392	0	2	1	1	1	だいぶ	1	3	0	0	0	0	2	1	2	1	2	2	1	1	5	3	5	5	2	5	3	6	4	6	6	5	5	5	5	6	2
393	0	2	1	1	4	とおふ	1	2	0	0	0	0	3	3	3	3	3	3	3	3	4	4	4	4	4	4	4	4	4	4	4	4	4	2	3	2	1
394	0	2	1	1	1	大豆ミート	1	3	0	0	0	0	3	1	2	2	2	1	1	1	5	5	5	7	1	7	4	3	5	7	6	7	5	7	4	5	1
395	0	2	1	1	3	植物性の食品	1	3	0	0	0	0	1	1	2	1	1	1	1	1	2	2	5	5	1	3	2	2	7	5	3	3	3	5	3	5	2
396	0	2	0	1	3	大豆	1	3	0	0	0	0	2	1	2	1	2	1	1	1	1	3	2	5	2	3	5	3	5	4	6	6	5	6	4	2	1
397	0	2	1	1	3	ヴィーガン	1	1	0	0	0	0	1	3	2	1	1	1	1	1	4	3	7	4	3	3	5	5	3	4	5	4	4	3	3	3	3
398	0	2	1	1	4	大豆ミート	1	3	0	0	0	0	3	3	3	3	3	3	3	3	4	2	2	7	5	7	1	2	7	4	4	4	3	2	2	2	1
399	0	2	0	1	4	豆腐	1	1	0	0	0	0	1	1	2	1	1	2	2	1	4	4	5	4	4	4	4	4	4	4	4	4	4	4	4	4	1
400	0	2	0	1	1	肉と味が変わらない	1	1	0	0	0	0	1	1	1	1	1	2	2	2	3	4	5	4	4	4	3	4	4	4	4	5	5	5	5	5	2
401	0	2	1	5	4	特にない	3	3	0	0	0	0	3	3	3	3	3	3	3	3	6	4	4	4	4	3	3	4	4	2	4	4	5	5	5	4	4
402	0	2	1	1	4	美味しくなさそう、おなかいっぱいにならなそう	3	3	0	0	0	0	1	1	2	1	2	2	1	2	4	3	6	2	6	2	7	4	1	2	5	4	5	4	4	5	1
403	0	2	1	1	1	カエル	3	3	0	0	0	0	2	1	2	2	2	1	1	1	4	5	3	4	5	4	5	4	4	4	6	6	5	5	5	5	3
404	0	2	0	1	3	豆腐	1	3	0	0	0	0	1	1	1	1	1	1	1	1	4	3	2	5	4	2	5	3	7	4	4	5	4	3	3	5	1
405	0	2	1	1	3	豆などの原料を使い、肉の食感に近づけたもの	1	1	0	0	0	0	3	1	2	3	3	3	2	3	3	5	6	6	1	6	2	2	6	5	6	4	5	5	4	4	1
406	0	2	1	1	3	大豆を使った製品	1	2	0	0	0	0	1	1	2	2	1	1	1	1	2	3	4	7	1	3	4	4	6	7	4	1	1	4	4	4	2
407	0	2	1	1	3	オートミール	3	3	0	0	0	0	1	1	3	2	3	3	3	3	4	7	4	4	5	5	5	6	3	5	5	2	3	5	4	4	2
408	0	2	1	1	2	味が肉とは少し違う。	1	3	0	0	0	0	3	3	2	3	3	3	2	3	3	4	5	4	4	3	5	4	3	2	5	5	5	5	5	4	1
409	0	2	1	1	3	ヘルシーなイメージ	3	3	0	0	0	0	1	1	1	2	1	2	1	1	4	5	3	6	2	3	5	2	6	4	5	3	5	4	4	3	2
410	0	2	0	1	1	体にいい。環境	1	2	0	0	0	0	2	1	3	1	2	1	2	1	4	7	6	6	1	2	4	4	7	6	6	5	5	1	3	7	3
411	0	2	1	1	1	大豆ミンチ 美味しい、健康	1	3	0	0	0	0	2	1	2	1	1	1	1	1	5	3	4	5	2	5	2	5	6	5	5	4	3	4	4	4	2
412	0	2	1	1	3	サラダチキン	1	3	0	0	0	0	1	1	2	1	2	2	1	1	2	5	6	6	5	5	6	3	6	3	6	6	5	6	6	3	2
413	0	2	1	1	3	本当の肉が食べられるわけではない	3	1	0	0	0	0	1	1	2	2	1	1	1	1	2	2	5	4	4	3	6	2	2	4	5	3	4	4	2	4	4
414	0	2	0	1	1	わからない	1	3	0	0	0	0	1	1	2	2	1	2	2	1	4	4	4	4	4	4	4	4	4	4	4	4	4	4	4	4	1
415	0	2	0	1	4	とくになし	3	3	0	0	0	0	3	3	3	3	3	3	3	3	4	4	4	4	4	4	4	4	4	4	4	4	4	4	4	4	3
416	0	2	1	1	2	大豆の肉	1	3	0	0	0	0	1	1	2	2	1	2	2	1	3	2	2	3	4	4	5	4	7	2	5	2	2	5	1	4	1
417	0	2	0	1	3	大豆	1	1	0	0	0	0	2	1	2	1	2	1	1	1	4	4	7	5	6	2	6	4	4	3	6	7	6	7	5	5	1
418	0	2	0	5	4	特になし	3	3	0	0	0	0	3	3	3	3	3	3	3	3	4	3	3	6	6	3	5	4	5	3	3	6	7	3	3	4	2
419	0	2	1	1	1	大豆ミート	1	1	0	0	0	0	1	1	2	1	1	2	1	2	3	3	5	1	5	6	7	7	2	2	6	6	5	6	2	3	1
420	0	2	0	1	4	なし	3	3	0	0	0	0	3	3	3	3	3	3	3	3	4	3	5	4	2	4	4	4	4	4	4	4	6	4	6	5	1
421	0	2	0	1	4	味の質が落ちる	1	1	0	0	0	0	2	1	2	1	2	1	1	1	4	4	5	5	4	4	5	4	5	3	4	4	3	3	3	1	1
422	0	2	1	1	3	あ	3	3	0	0	0	0	3	1	2	2	1	2	2	3	4	4	4	4	4	4	4	4	4	4	4	5	4	4	4	4	2
423	0	2	0	5	4	豆	2	1	0	0	0	0	3	3	3	3	3	3	3	3	5	4	3	4	5	4	4	5	5	6	7	4	2	6	3	5	1
424	0	2	0	1	3	倫理的な問題	1	1	0	0	0	0	1	1	2	2	2	2	1	1	4	1	1	7	1	6	5	6	3	4	6	5	4	7	5	4	1
425	0	2	0	3	4	特に理由はありません	3	3	0	0	0	0	3	3	2	2	2	2	2	2	3	3	4	4	4	4	4	4	4	4	4	4	4	4	4	4	1
426	0	2	0	1	4	美味しくなさそう	1	3	0	0	0	0	3	3	3	3	3	3	3	3	7	5	4	5	1	4	6	3	6	3	4	5	1	4	4	5	2
427	0	2	1	3	3	肉みたい	1	3	0	0	0	0	3	3	3	3	3	3	3	3	1	2	2	2	6	1	5	6	1	1	6	4	4	6	4	4	1
428	0	2	0	1	3	美味しくなさそう	3	3	0	0	0	0	2	1	2	1	2	1	1	1	4	4	4	4	4	4	4	4	5	4	4	4	4	4	4	4	2
429	0	2	0	1	1	豆を使ったもの	1	3	0	0	0	0	2	1	2	1	2	1	1	1	4	3	4	6	2	4	4	4	6	5	4	3	3	5	3	3	3
430	0	2	0	1	3	なし	3	3	0	0	0	0	3	3	2	2	1	2	1	2	5	4	4	3	4	4	5	4	4	1	4	3	4	5	3	3	2
431	0	2	0	1	1	大豆	1	3	0	0	0	0	2	1	2	1	1	3	1	1	3	3	4	4	3	5	5	4	5	4	6	2	1	2	1	4	2
432	0	2	0	1	3	特になし	3	3	0	0	0	0	1	1	2	2	1	1	2	1	4	1	4	4	4	6	1	5	5	4	6	4	5	5	5	4	2
433	0	2	0	1	4	昆虫食	1	1	0	0	0	0	3	3	3	3	3	3	3	3	1	5	6	5	6	4	5	6	6	1	3	2	2	2	1	1	2
434	0	2	0	1	4	ソイミート	1	3	0	0	0	0	2	1	2	1	2	1	1	2	2	6	6	6	4	3	7	5	5	4	3	3	5	5	6	5	2
435	0	2	0	1	3	かわりモノ	1	1	0	0	0	0	1	2	2	2	1	1	1	2	4	4	4	4	4	4	4	3	4	4	2	3	3	3	3	5	2
436	0	2	0	3	4	特にない	2	3	0	0	0	0	3	3	3	3	3	3	3	3	5	1	3	4	4	5	5	3	4	3	4	4	4	4	5	4	1
437	0	2	0	1	1	サステナブル	3	3	0	0	0	0	1	2	2	1	1	2	1	3	4	2	4	4	2	3	3	4	2	3	3	4	3	3	4	2	2
438	0	2	0	1	3	味が心配	1	3	0	0	0	0	2	1	2	1	2	1	2	1	3	5	3	4	6	5	5	5	5	3	5	5	4	4	4	5	2
439	0	2	1	1	3	大豆とか豆腐	1	1	0	0	0	0	1	1	2	1	2	1	1	1	4	2	6	4	4	5	6	5	5	4	7	5	5	6	5	4	1
440	0	2	1	1	1	とうふ	1	3	0	0	0	0	1	2	2	3	1	2	2	2	4	3	5	6	5	4	6	4	4	5	5	7	5	6	5	2	3
441	0	2	1	1	3	大豆	1	2	0	0	0	0	1	1	2	1	1	1	1	1	1	5	6	2	5	2	7	5	5	1	5	5	5	5	5	5	1
442	0	2	0	1	1	ダイエット	1	3	0	0	0	0	2	1	2	1	2	1	1	1	1	4	4	5	1	6	3	2	3	4	3	2	1	5	2	4	1
443	0	2	0	1	4	味がイマイチ	3	3	0	0	0	0	1	1	2	2	1	2	2	1	1	6	6	1	6	1	7	6	1	1	4	4	4	4	4	4	1
444	0	2	0	1	3	大豆	1	1	0	0	0	0	2	2	2	2	1	1	1	1	2	2	2	2	2	2	2	2	2	2	3	4	3	3	3	3	2
445	0	2	1	1	4	テレビの特集を見たことがあるがあまり覚えていない	3	3	0	0	0	0	1	1	2	2	1	2	1	1	3	3	4	4	2	2	5	3	4	2	5	4	3	6	5	4	1
446	0	2	0	1	4	単語の意味がよくわからない	1	3	0	0	0	0	1	1	2	1	1	2	1	2	2	3	5	5	5	2	5	3	6	2	5	3	3	5	2	2	2
447	0	2	0	1	4	知らん	1	3	0	0	0	0	1	1	1	3	3	3	3	3	4	3	3	4	2	4	5	4	4	4	4	4	4	4	4	4	1
448	0	2	0	5	1	大豆	1	1	0	0	0	0	3	3	3	3	2	1	2	1	6	6	2	3	5	6	4	4	4	5	1	1	1	1	1	1	2
449	0	2	0	1	4	なし	1	1	0	0	0	0	1	1	2	1	1	1	1	1	2	3	2	3	4	5	4	3	2	2	4	5	3	4	3	4	1
450	0	2	0	1	1	あまり美味しくない。	1	3	0	0	0	0	2	3	2	2	1	1	2	1	5	2	5	4	2	4	2	4	5	5	4	5	5	6	6	5	2
451	1	1	0	1	3	肉	2	1	1	2	0	0	2	1	2	2	1	1	2	2	3	4	3	4	3	4	3	3	4	5	3	4	4	5	5	2	1
452	1	1	0	2	3	大豆ミート	2	2	1	1	1	1	1	1	2	1	2	1	2	2	4	6	5	4	2	4	2	4	6	4	4	5	4	5	4	4	2
453	1	1	0	1	3	普通の肉と変わらない	1	2	1	1	1	3	1	3	1	1	1	2	1	1	3	5	4	3	5	3	5	3	5	3	5	5	5	5	5	5	3
454	1	1	0	5	4	なし	3	3	1	3	1	2	1	2	2	1	1	3	2	1	6	6	6	6	5	7	7	4	4	7	7	6	4	2	4	5	1
455	1	1	1	4	1	豆腐ハンバーグ	1	3	1	3	1	2	3	3	3	3	3	3	3	3	4	4	6	6	2	4	2	6	2	6	6	5	4	2	4	3	2
456	1	1	0	1	4	大豆肉	1	1	1	2	0	0	1	2	1	2	3	2	2	1	2	5	6	3	6	5	6	4	3	2	4	3	3	6	3	5	2
457	1	1	0	1	1	大豆	1	3	1	1	1	2	1	2	1	1	1	2	2	1	5	3	5	5	3	5	5	3	3	5	5	4	3	5	3	3	2
458	1	1	1	1	3	なし	3	3	1	1	1	3	3	3	3	3	3	2	3	2	5	4	6	7	1	5	2	4	5	5	6	6	6	6	5	5	3
459	1	1	1	1	3	豆腐	1	3	1	2	0	0	1	2	2	1	1	2	2	1	3	3	7	5	3	5	5	4	5	4	5	4	4	5	4	3	2
460	1	1	0	1	1	大豆	1	3	1	2	0	0	1	2	1	2	2	1	2	2	5	5	4	5	4	4	4	4	5	3	5	4	5	4	4	4	1
461	1	1	1	1	2	大豆ミート	1	3	1	2	0	0	2	1	2	2	2	1	2	1	4	4	4	3	4	3	4	3	4	4	4	4	4	4	4	3	3
462	1	1	1	1	1	おいしい	3	3	1	1	1	2	1	2	2	1	2	1	2	2	4	5	3	2	6	5	2	3	4	3	5	4	4	3	3	4	2
463	1	1	0	2	2	なし	2	2	1	2	0	0	2	2	2	2	2	2	2	2	5	2	2	3	2	3	4	4	5	1	3	3	2	5	6	3	2
464	1	1	1	1	1	豆	1	3	1	2	0	0	1	2	1	1	2	2	2	1	2	3	6	2	5	3	6	2	5	2	4	3	4	4	2	4	2
465	1	1	1	1	3	大豆を使っている	3	3	1	2	0	0	2	2	2	2	2	1	2	2	3	4	5	5	4	4	4	5	5	4	4	3	3	4	5	5	2
466	1	1	1	1	4	特になし	3	3	1	1	1	2	3	3	3	3	3	3	3	3	2	4	5	2	4	2	3	6	6	4	2	1	1	1	1	2	1
467	1	1	0	1	3	動物ではないタンパク質の物質から筋繊維に酷似したものを作り、肉として提供する	3	1	1	2	0	0	1	2	1	1	1	2	2	1	4	3	3	5	4	5	5	5	5	4	4	4	4	4	4	4	1
468	1	1	1	1	2	美味しくない	1	3	1	1	1	3	1	2	1	2	2	2	2	2	1	4	7	5	2	5	2	4	2	3	4	4	4	5	4	5	2
469	1	1	0	1	2	大豆ミート。	3	3	1	2	0	0	1	2	2	2	1	2	2	1	3	1	3	7	1	6	5	2	7	4	6	5	3	5	3	2	1
470	1	1	0	1	4	お	3	2	1	3	1	3	3	3	3	3	3	3	3	3	5	6	4	6	5	4	5	5	4	5	5	4	5	4	5	5	2
471	1	1	1	1	4	大豆ミート	1	3	1	2	0	0	1	2	1	2	3	1	2	2	1	7	7	1	7	1	7	7	2	1	5	3	1	5	1	1	1
472	1	1	0	1	2	ない	1	1	1	2	0	0	3	3	3	3	3	3	3	3	3	3	5	5	5	5	5	5	5	5	5	6	5	5	5	5	1
473	1	1	1	2	3	くじら？	3	3	1	2	0	0	1	2	2	1	1	1	1	2	4	1	6	3	3	5	3	4	4	5	3	6	6	3	5	6	2
474	1	1	0	1	3	かはやわっあかさらゆかなやつならや	3	3	1	1	1	3	3	3	3	3	3	3	3	3	4	4	4	4	4	4	4	4	4	4	4	4	4	4	4	4	3
475	1	1	1	1	4	わからない	1	3	1	3	1	1	1	2	2	2	1	2	1	1	3	5	5	3	5	3	6	4	2	2	4	4	4	5	4	4	4
476	1	1	1	1	3	豆でできているイメージ	1	2	1	2	0	0	2	2	2	3	2	2	2	3	3	6	6	6	2	4	2	6	4	6	5	5	6	6	4	5	2
477	1	1	1	1	3	大豆ミート	1	3	1	2	0	0	1	2	1	2	1	2	2	1	3	5	3	5	2	5	3	2	6	3	5	2	2	3	2	2	3
478	1	1	0	1	3	豆腐	3	3	1	2	0	0	2	2	2	1	3	3	2	1	4	3	4	4	3	4	5	5	4	3	5	4	4	4	5	2	2
479	1	1	1	1	4	特にない	3	3	1	1	1	1	1	2	1	2	3	1	2	2	1	4	4	4	4	4	4	5	2	4	4	4	4	4	4	4	1
480	1	1	0	1	1	なたなたまなたまやなたにゆなたまなたやはなまなたなはたやな	1	1	1	1	1	1	3	1	1	2	1	2	2	2	2	3	2	3	4	3	6	5	4	2	3	2	2	3	4	2	1
481	1	1	1	1	3	何が入っているか分からなくて不安	3	3	1	2	0	0	1	2	2	2	2	3	2	2	2	3	5	4	3	5	5	3	5	4	4	3	3	3	3	3	2
482	1	1	1	1	4	わからない	3	3	1	1	1	2	3	3	3	3	3	3	3	3	2	2	7	2	5	5	6	5	1	1	5	5	5	5	5	5	1
483	1	1	0	1	1	低カロリーで健康的	1	1	1	2	0	0	2	2	1	1	1	2	2	1	4	3	3	4	3	5	3	2	6	4	5	4	6	6	4	5	1
484	1	1	1	2	3	なし	2	1	1	2	0	0	1	1	1	1	1	1	1	1	5	2	5	2	3	5	2	4	3	3	4	5	3	5	3	3	2
485	1	1	0	1	3	（てきゆこれ	1	3	1	1	1	2	1	2	1	1	2	2	2	1	4	4	4	2	6	3	7	4	3	4	5	5	2	3	6	4	3
486	1	1	1	1	3	だいず	1	3	1	1	1	3	1	2	2	2	1	2	2	1	2	4	4	4	6	4	5	3	5	2	4	3	4	4	5	4	1
487	1	1	0	1	4	特になし	3	3	1	1	1	1	3	3	3	3	3	3	3	3	4	4	4	4	4	4	4	4	4	4	4	4	4	4	4	4	1
488	1	1	0	1	4	代替肉という言葉自体初めて聞いた	3	3	1	2	0	0	2	2	1	1	1	2	2	1	3	2	2	2	5	2	7	2	1	2	5	4	2	3	3	3	1
489	1	1	1	1	4	興味ない	3	3	1	1	1	2	3	3	3	3	3	3	3	3	5	3	6	4	4	3	6	3	3	4	6	3	4	4	4	4	3
490	1	1	1	1	3	大豆ミート	1	3	1	3	1	2	1	2	2	1	1	2	2	1	3	3	5	5	4	5	4	3	6	5	5	5	5	5	4	4	3
491	1	1	1	1	4	わからない	3	2	1	3	1	1	1	2	1	2	1	2	2	1	4	2	5	5	4	3	6	3	4	3	7	4	5	5	3	4	1
492	1	1	0	1	3	肉に近い	1	1	1	1	1	2	1	1	1	1	2	2	1	3	5	5	3	7	4	3	5	5	4	3	6	2	6	3	5	2	1
493	1	1	1	1	2	大豆ミート	1	3	1	2	0	0	1	2	1	2	1	1	2	2	2	4	4	2	6	3	6	4	3	1	4	4	4	4	4	4	2
494	1	1	1	1	3	大豆ミート	1	1	1	2	0	0	1	2	2	2	1	1	1	1	3	3	4	5	6	6	6	5	5	6	6	6	5	6	6	5	1
495	1	1	0	1	3	加工食品	1	3	1	2	0	0	1	2	1	2	2	1	2	2	1	3	4	6	4	3	6	5	5	4	4	4	4	3	2	3	2
496	1	1	0	1	4	オートミール	3	3	1	1	1	1	1	1	1	1	1	1	1	1	2	4	3	3	4	3	5	2	2	3	3	1	1	1	1	1	3
497	1	1	0	1	4	不安	3	3	1	2	0	0	1	2	2	2	2	2	1	2	3	4	5	2	4	2	5	5	4	1	3	4	6	4	4	4	1
498	1	1	0	1	3	奇妙	1	1	1	1	1	3	2	2	2	2	2	1	1	2	4	4	4	3	5	5	4	4	5	4	5	5	5	5	5	5	1
499	1	1	0	1	4	大豆ハンバーグ	1	3	1	1	1	3	1	2	2	2	2	1	2	2	1	6	7	3	7	2	7	3	6	3	5	5	5	5	6	5	3
500	1	1	1	1	3	健康的、環境を考えている	3	3	1	2	0	0	1	2	2	2	1	2	1	1	4	3	5	4	4	4	5	3	5	4	4	3	4	4	3	4	1
501	1	1	0	1	4	パサパサしてる	1	3	1	1	1	2	1	1	1	1	2	2	2	1	2	4	5	5	4	3	3	2	3	1	2	5	3	2	3	4	1
502	1	1	1	1	4	おから	3	3	1	3	1	2	1	2	1	2	1	2	2	1	2	5	6	2	6	3	7	4	2	2	4	3	3	2	3	3	2
503	1	1	0	1	3	肉の代わり	3	3	1	2	0	0	3	3	3	3	3	3	3	3	2	5	5	3	5	3	5	5	3	3	5	5	5	4	4	4	1
504	1	1	0	1	3	豆腐のハンバーグ	1	3	1	2	0	0	1	2	1	1	1	2	2	1	2	5	6	3	3	4	7	4	5	3	5	5	4	5	3	4	2
505	1	1	0	1	3	ボソボソでおいしくないイメージ	1	3	1	2	0	0	1	2	1	2	1	1	2	2	3	4	4	1	7	2	4	5	5	1	5	4	3	5	3	5	1
506	1	1	1	1	4	大豆	1	3	1	3	1	2	2	1	3	2	1	2	2	2	4	4	4	3	5	4	4	4	4	4	4	4	4	5	4	4	2
507	1	1	0	1	4	なし	1	1	1	2	0	0	1	2	1	3	1	1	2	2	5	4	6	4	3	4	5	5	2	2	5	4	5	6	5	6	2
508	1	1	1	1	4	大豆	1	2	1	2	0	0	1	2	1	1	1	2	2	1	3	3	5	5	3	5	4	5	4	4	5	4	4	3	3	3	2
509	1	1	0	1	1	大豆肉	1	1	1	2	0	0	1	2	1	1	1	2	2	2	4	1	2	6	2	4	2	2	7	4	4	4	4	5	2	4	1
510	1	1	1	2	4	あまりよくわからない	3	3	1	1	1	2	1	1	1	2	1	1	1	2	5	5	5	4	5	4	4	3	4	4	4	5	5	5	4	4	1
511	1	1	1	1	3	大豆	1	3	1	1	1	3	2	2	1	1	2	2	2	1	5	4	5	4	6	4	6	4	2	2	6	4	5	5	3	2	1
512	1	1	1	1	3	大豆肉	3	3	1	2	0	0	2	2	2	1	2	1	2	1	4	3	5	5	6	5	5	3	6	2	5	5	5	3	4	5	1
513	1	1	1	3	4	変えた肉？	3	3	1	2	0	0	1	2	2	2	3	2	2	1	5	2	2	5	4	6	5	1	7	4	6	3	5	5	3	1	3
514	1	1	1	1	1	yfyb	1	1	1	2	0	0	1	2	2	1	1	2	1	1	3	4	3	3	4	4	4	3	4	4	4	3	4	3	4	4	3
515	1	1	1	1	1	大豆ミート	3	3	1	2	0	0	1	2	1	2	2	1	2	2	2	5	3	5	1	5	5	3	5	5	3	3	3	5	3	2	3
516	1	1	0	1	4	特に無し	2	1	1	2	0	0	3	1	2	1	1	2	2	3	4	4	4	4	2	4	5	5	6	6	5	5	4	5	4	2	1
517	1	1	0	1	4	まずそう	3	3	1	1	1	1	3	3	3	3	3	1	2	2	3	3	3	3	3	3	3	6	3	3	4	4	4	4	4	4	3
518	1	1	1	1	2	大豆肉	1	3	1	3	1	2	1	1	2	2	1	2	1	1	3	3	7	4	2	4	5	5	2	4	6	5	5	6	5	5	2
519	1	1	0	1	4	高い	3	3	1	2	0	0	1	2	2	1	3	2	1	2	4	4	2	5	3	3	4	4	5	4	4	4	4	4	3	4	1
520	1	1	0	2	1	5	2	3	1	1	1	1	1	2	2	2	2	1	1	1	4	4	4	5	4	4	4	4	4	4	4	4	4	4	4	3	2
521	1	1	1	1	4	大豆	1	3	1	3	1	2	1	3	2	3	1	3	2	1	1	3	7	2	6	2	7	7	2	2	6	6	5	5	4	5	2
522	1	1	0	1	2	動物の肉の代わりに大豆を使う	1	3	1	3	1	2	1	2	1	2	1	2	2	1	2	5	5	3	5	2	6	3	5	3	5	3	3	3	2	3	2
523	1	1	1	1	4	健康	3	3	1	1	1	3	1	2	1	2	2	1	2	2	1	7	7	1	7	2	7	1	2	1	5	6	4	2	2	2	1
524	1	1	0	1	4	馬肉	3	3	1	3	1	2	1	2	3	1	3	2	1	3	3	4	4	4	4	3	4	5	3	4	4	5	4	5	5	4	1
525	1	1	0	1	3	分からない	3	3	1	2	0	0	2	3	3	3	3	3	3	3	4	4	4	3	4	4	4	4	4	4	4	4	4	4	4	4	2
526	1	1	1	1	3	肉ではないが、肉のような味わいや、成分が含まれている	3	3	1	1	1	2	2	1	2	1	2	2	2	1	3	2	6	5	5	6	2	2	6	5	6	2	3	6	6	3	3
527	1	1	1	1	4	本当のお肉みたいと聞くけど、どうせ大豆の味するんでしょと思う。	1	3	1	2	0	0	1	2	3	2	1	3	2	3	2	5	5	5	5	3	6	5	4	3	4	4	4	5	4	3	2
528	1	1	1	3	1	大豆	1	3	1	1	1	2	2	2	2	1	1	2	2	1	6	4	6	7	2	6	2	5	3	7	6	6	6	6	6	6	3
529	1	1	0	1	4	ない	3	3	1	2	0	0	2	3	3	3	3	3	3	3	1	1	1	1	1	1	1	2	1	1	1	2	2	2	2	2	1
530	1	1	1	1	4	肉を食べている！！！って感じがしなさそう	3	3	1	1	1	2	1	2	1	2	1	1	2	2	2	4	5	5	4	4	4	5	6	4	1	1	1	1	1	1	1
531	1	1	0	1	4	なし	3	3	1	2	0	0	1	2	2	2	1	1	2	1	4	4	4	4	3	4	4	5	4	6	5	4	4	4	4	3	1
532	1	1	0	1	4	ー	3	3	1	3	1	1	1	2	1	2	2	2	2	2	4	6	6	2	4	4	6	4	2	4	2	2	1	4	2	2	2
533	1	1	1	1	1	肉っぽくしてある大豆	3	3	1	2	0	0	1	2	2	2	2	2	1	1	3	3	5	2	6	1	7	7	2	2	2	2	2	3	2	3	2
534	1	1	0	1	3	コオロギや大豆	1	3	1	2	0	0	1	2	1	1	1	2	2	1	5	4	4	6	3	5	4	4	7	4	5	5	4	6	4	3	2
535	1	1	0	2	4	体に悪そう	3	3	1	2	0	0	3	3	3	3	3	3	3	3	4	4	3	2	5	4	6	2	5	2	5	3	3	2	3	3	2
536	1	1	1	1	1	本来の肉よりヘルシーで環境に良いイメージがある。	1	3	1	3	1	1	2	2	2	2	1	2	1	1	5	2	5	5	3	6	3	4	5	5	5	5	5	5	6	5	2
537	1	1	1	1	2	豆腐	3	2	1	2	0	0	2	2	1	3	2	2	3	1	3	1	4	3	2	2	1	3	3	5	7	3	3	5	3	3	1
538	1	1	1	1	2	大豆ミート	1	3	1	1	1	2	1	2	1	2	3	3	3	3	2	7	4	1	5	5	5	2	3	1	4	3	4	3	3	3	2
539	1	1	0	1	4	なし	1	3	1	2	0	0	3	3	3	3	3	3	3	3	1	4	5	3	5	3	4	3	2	1	4	3	3	3	3	3	2
540	1	1	0	1	3	大豆を使っている	1	3	1	2	0	0	1	2	1	2	1	2	2	2	5	5	4	7	1	5	3	5	6	6	4	4	4	5	4	3	2
541	1	1	1	1	4	豆腐ハンバーグ	3	3	1	1	1	3	1	2	1	1	1	2	2	1	2	5	5	2	4	2	3	3	5	4	5	5	5	6	3	5	1
542	1	1	1	1	2	大豆ミートなど。ベジタリアンのタンパク源となっている 美味しいとは思わなちゃ	1	3	1	1	1	2	1	2	1	2	3	1	2	3	6	2	5	3	6	5	3	2	3	1	5	4	4	5	5	2	2
543	1	1	0	1	2	よく大豆などで代替されているイメージ	1	3	1	1	1	2	1	2	2	2	2	2	1	1	3	4	7	4	4	3	5	2	5	4	5	4	3	5	4	5	2
544	1	1	0	2	4		3	3	1	2	0	0	3	3	3	3	3	3	3	3	5	4	4	4	4	4	4	5	4	5	3	4	3	5	5	4	1
545	1	1	0	1	3	だいず	3	3	1	2	0	0	3	2	1	1	2	2	2	1	5	4	5	5	4	4	3	3	7	4	4	4	4	4	4	4	3
546	1	1	1	1	4	特にない	3	3	1	3	1	2	3	3	3	3	3	3	3	3	2	3	4	4	5	4	5	4	5	3	5	2	5	5	3	5	1
547	1	1	0	1	3	大豆	1	3	1	2	0	0	2	2	1	1	1	1	2	1	4	1	3	5	4	5	5	2	7	5	7	3	2	5	5	4	2
548	1	1	0	1	3	美味しくなさそう	3	3	1	2	0	0	1	2	1	2	3	1	2	2	3	4	5	5	3	5	2	3	5	4	5	3	3	3	4	2	2
549	1	1	0	1	4	豆腐	3	3	1	2	0	0	1	2	1	1	1	2	2	1	2	3	3	2	3	2	5	3	1	2	5	5	5	6	5	5	2
550	1	1	0	5	4	分からない	3	3	1	2	0	0	3	3	3	3	3	3	3	3	7	5	4	4	5	4	4	4	3	4	3	5	4	4	4	3	4
551	1	1	1	3	2	笑笑	3	1	1	1	1	2	1	1	1	2	2	2	2	2	6	2	6	2	4	6	2	3	2	2	3	4	2	3	2	4	2
552	1	1	0	1	1	大豆ミート	1	3	1	1	1	2	1	2	2	2	2	2	2	1	4	3	6	5	3	5	2	1	7	5	6	5	4	5	3	4	3
553	1	1	0	1	1	大豆でできていてタンパク質が豊富	1	3	1	2	0	0	2	1	2	1	2	2	1	2	3	6	5	6	4	3	5	5	5	3	3	2	2	3	4	5	3
554	1	1	1	1	3	大豆	1	3	1	2	0	0	1	2	2	2	1	3	1	1	4	3	5	4	4	4	5	5	6	3	5	4	4	5	3	5	1
555	1	1	0	1	4	健康	3	3	1	2	0	0	3	3	3	3	3	3	3	3	4	4	4	4	4	5	4	5	5	4	4	5	4	5	5	2	1
556	1	1	0	1	3	大豆	1	2	1	1	1	2	1	2	1	1	2	2	2	1	3	5	6	5	3	5	3	5	5	4	5	5	5	5	5	5	2
557	1	1	1	1	4	オートミール	3	3	1	3	1	1	3	3	3	3	3	3	3	3	6	6	5	4	4	6	7	6	3	3	5	5	5	5	3	3	3
558	1	1	0	1	2	合成肉	1	1	1	2	0	0	1	2	1	1	2	1	1	1	2	3	4	5	3	4	6	6	3	3	3	4	5	6	5	4	1
559	1	1	1	1	4	普通の肉よりヘルシーそう	1	3	1	1	1	2	1	2	3	2	2	3	3	1	1	5	5	4	6	2	7	2	2	2	5	3	4	5	5	3	1
560	1	1	1	1	3	大豆ミート	1	3	1	3	1	2	1	2	1	2	1	2	2	1	2	5	6	4	5	2	6	5	4	2	5	5	4	5	3	4	1
561	1	1	1	1	4	健康に悪そう	1	3	1	2	0	0	1	2	1	2	2	1	2	1	3	6	7	2	5	3	7	5	3	3	5	5	2	5	3	3	2
562	1	1	0	1	3	なし	3	3	1	2	0	0	2	2	2	2	2	2	2	2	6	6	6	6	6	6	6	6	7	6	5	5	7	6	7	6	2
563	1	1	0	1	1	なし	1	1	1	1	1	1	1	1	1	1	1	2	2	1	6	6	6	6	6	6	7	7	7	7	6	7	5	6	6	6	2
564	1	1	1	1	1	ソーセージ、ハム	3	3	1	3	1	2	3	3	3	3	3	1	3	2	6	5	4	2	4	3	1	2	1	3	3	4	4	3	4	1	2
565	1	1	0	1	4	ビーフ	3	3	1	1	1	3	1	2	1	1	1	2	2	1	2	4	4	3	5	5	4	2	6	4	2	2	2	2	2	1	3
566	1	1	0	1	2	特になし	1	3	1	1	1	2	1	2	1	3	3	3	3	3	2	4	6	5	4	2	6	4	5	2	6	6	6	6	5	5	2
567	1	1	0	1	2	大豆臭 硬い食感 高価	3	1	1	1	1	1	1	2	1	1	1	2	3	1	6	3	2	5	1	6	3	3	6	6	5	3	4	6	4	4	2
568	1	1	0	1	2	大豆	1	1	1	3	1	2	1	1	2	2	1	1	1	2	5	4	5	6	2	6	3	6	5	7	1	3	3	4	3	1	3
569	1	1	1	1	4	美味しくない	1	3	1	2	0	0	1	2	1	2	2	2	2	1	2	4	4	1	6	2	7	3	5	3	4	2	2	2	3	4	2
570	1	1	0	1	4	豆	1	3	1	3	1	2	1	1	3	2	3	1	2	2	3	3	5	3	6	3	6	5	3	2	5	2	2	6	5	4	2
571	1	1	1	1	3	本当に肉の味がするのか気になる	1	3	1	3	1	2	1	2	1	1	1	2	2	1	2	4	5	3	6	4	3	3	5	2	4	3	4	4	4	4	1
572	1	1	0	2	2	なし	2	1	1	1	1	3	2	1	2	2	2	2	2	2	4	4	3	5	3	3	6	3	6	3	4	1	5	4	3	7	2
573	1	1	1	1	1	大豆ミート	1	3	1	2	0	0	2	3	2	1	2	3	1	1	4	4	7	5	2	5	3	4	6	5	7	6	6	6	5	6	3
574	1	1	1	1	4	豆	1	3	1	3	1	2	1	2	1	1	1	2	2	1	3	2	6	5	5	5	5	2	5	2	6	2	2	5	3	5	2
575	1	1	0	1	3	栄養価が高くて安く購入できるイメージです。	1	3	1	2	0	0	2	1	3	1	2	2	1	1	6	6	5	5	6	7	2	5	4	5	6	5	6	7	5	5	2
576	1	1	1	1	4	美味しくなさそう	3	3	1	3	1	1	1	3	3	3	3	2	1	3	2	5	6	2	6	5	6	3	3	2	5	6	5	6	2	5	2
577	1	1	0	1	3	普茶料理	3	3	1	2	0	0	1	2	1	2	2	2	2	1	1	5	4	7	1	5	3	2	6	3	2	2	2	2	1	1	2
578	1	1	1	1	1	大豆ミート	1	3	1	1	1	2	1	2	1	1	1	2	2	2	4	2	3	6	2	6	2	3	5	7	5	5	4	3	3	5	2
579	1	1	0	1	3	作られたものなので味が落ちそう	3	3	1	2	0	0	2	2	1	1	1	2	2	1	4	4	3	3	4	4	3	4	5	4	4	4	4	5	4	4	1
580	1	1	1	1	3	ハンバーグ	1	3	1	2	0	0	1	2	2	2	2	2	1	2	5	2	2	6	2	2	2	5	5	3	4	5	5	5	5	4	1
581	1	1	0	1	3	大豆	1	3	1	2	0	0	2	2	1	1	1	2	2	1	2	3	2	5	4	5	3	2	6	3	3	2	2	5	5	3	2
582	1	1	0	1	3	なし	3	3	1	3	1	1	3	3	3	3	3	3	3	3	4	4	4	4	4	4	4	4	4	4	4	4	4	4	4	4	4
583	1	1	0	1	3	環境にやさしい	1	1	1	2	0	0	1	2	2	2	2	2	2	2	1	4	4	5	4	7	4	1	4	4	4	4	4	4	4	4	1
584	1	1	1	1	4	なし	3	3	1	1	1	2	3	3	3	3	3	3	3	3	1	6	5	5	5	1	7	2	5	2	4	4	3	5	4	3	2
585	1	1	0	1	4	わからない	3	3	1	1	1	3	2	2	2	2	3	3	3	3	5	3	3	3	3	3	3	3	3	3	4	4	4	3	3	3	1
586	1	1	0	1	1	大豆ミート	1	3	1	2	0	0	1	2	2	2	2	2	2	1	1	5	6	4	5	5	4	2	5	4	3	1	2	3	2	3	1
587	1	1	1	1	4	大豆などを使っている	1	2	1	2	0	0	1	2	1	2	1	2	2	2	3	3	6	6	4	2	5	2	5	3	5	4	3	5	4	5	2
588	1	1	0	1	4	よく分からん	3	3	1	2	0	0	3	3	3	3	3	3	3	3	1	1	1	1	1	1	1	1	1	1	1	1	1	1	1	1	2
589	1	1	0	1	4	昆虫食	1	3	1	1	1	2	1	3	2	2	3	2	1	1	4	5	5	5	4	5	5	4	5	5	5	4	4	5	5	4	1
590	1	1	1	1	1	大豆ミート	1	3	1	2	0	0	3	3	2	2	3	3	2	3	3	1	7	3	5	1	6	3	2	2	7	6	6	6	4	4	2
591	1	1	0	1	3	高い	1	1	1	1	1	3	1	2	1	2	1	2	2	1	5	3	3	5	3	3	5	3	5	3	5	5	5	5	5	5	2
592	1	1	0	2	2	なし	2	2	1	3	1	2	1	2	1	3	2	1	2	2	4	4	1	6	6	3	6	3	5	5	5	4	5	4	3	5	2
593	1	1	0	1	1	職の問題の解決につながる	1	3	1	2	0	0	1	1	2	2	1	2	1	1	5	3	5	5	4	4	5	5	3	4	5	3	5	5	4	4	2
594	1	1	0	1	1	ソーセージ	3	3	1	3	1	3	1	2	1	2	2	1	2	2	3	2	3	5	3	4	3	4	3	3	4	4	3	5	4	4	4
595	1	1	1	1	1	大豆	1	2	1	1	1	3	1	2	2	2	2	1	1	2	4	6	6	5	5	3	7	7	4	4	5	4	4	5	3	4	2
596	1	1	0	1	2	はい	1	1	1	1	1	2	1	2	3	2	3	2	3	1	3	3	3	3	3	3	3	3	3	3	5	5	3	5	4	3	2
597	1	1	1	1	4	大豆	3	3	1	2	0	0	1	2	1	2	3	1	2	1	6	1	7	7	1	7	1	7	7	7	4	4	2	3	2	2	3
598	1	1	1	1	3	おいしいの？	1	3	1	1	1	2	1	2	2	2	1	2	2	1	2	5	5	6	2	6	5	4	6	4	5	4	3	5	4	5	1
599	1	1	1	1	4	わからない	1	3	1	3	1	2	2	2	1	2	1	2	2	2	2	4	6	5	4	4	4	5	5	4	5	5	4	5	4	4	1
600	1	1	1	1	3	大豆ミート	3	3	1	2	0	0	1	1	2	2	3	2	1	1	4	4	3	2	4	3	4	3	5	3	4	3	2	4	4	3	1
601	1	1	1	1	1	ソイミート	1	3	1	2	0	0	1	2	1	2	2	1	2	1	5	3	3	6	1	5	2	1	7	5	3	2	1	3	3	3	1
602	1	1	1	1	1	大豆ハンバーグ	1	3	1	3	1	2	1	2	2	2	1	2	1	1	5	3	7	7	1	6	3	7	7	7	7	7	7	7	7	7	2
603	1	1	0	1	4	代わりの肉	1	3	1	2	0	0	1	2	3	2	3	2	3	1	4	3	4	4	4	5	4	5	4	3	3	3	3	3	4	3	1
604	1	1	1	1	1	ソイミート	1	3	1	2	0	0	1	1	2	1	3	2	1	1	3	2	3	7	1	6	3	3	5	5	5	4	4	4	5	4	2
605	1	1	1	1	4	ない	1	3	1	3	1	3	1	1	1	2	1	2	2	3	4	4	6	3	5	4	4	4	4	3	4	4	4	4	4	4	1
606	1	1	1	1	3	豆腐	1	3	1	2	0	0	1	2	2	2	1	2	2	2	3	4	5	3	4	4	5	4	3	2	6	4	4	4	4	4	3
607	1	1	1	1	1	大豆ミート	1	3	1	2	0	0	1	2	1	2	2	1	2	1	4	3	6	6	3	6	3	5	5	3	5	5	5	5	5	5	1
608	1	1	1	1	4	なし	3	3	1	2	0	0	3	2	1	1	3	2	2	1	2	4	5	4	4	4	4	3	3	4	4	4	4	4	4	4	1
609	1	1	1	1	4	わからない	3	3	1	1	1	3	1	2	2	1	1	2	1	1	2	2	6	2	7	5	7	6	3	1	7	7	6	6	6	6	2
610	1	1	1	1	4	よく分からない	1	3	1	3	1	2	1	2	2	2	2	2	1	2	3	5	7	5	3	3	5	5	6	3	5	5	5	6	5	5	1
611	1	1	1	1	3	特になし	3	3	1	1	1	2	1	1	2	1	1	2	1	1	4	4	5	5	4	3	5	4	4	4	4	4	4	4	4	4	2
612	1	1	1	1	4	なし	3	3	1	3	1	3	1	1	1	1	2	3	2	3	4	4	4	5	5	3	4	3	3	3	4	4	2	4	5	2	1
613	1	1	0	2	2	特になし	2	1	1	1	1	3	1	2	2	1	1	2	2	1	2	3	3	2	5	6	5	3	3	2	4	4	4	4	5	2	1
614	1	1	0	1	4	特になし	3	3	1	1	1	2	1	2	1	1	1	2	2	1	4	4	4	6	3	4	4	4	5	4	4	4	4	4	4	4	1
615	1	1	0	1	4	ヘルシー	3	3	1	1	1	2	1	1	1	2	1	1	2	2	2	3	3	5	3	2	5	2	5	3	5	5	5	6	5	3	1
616	1	1	0	1	3	大豆ミート	1	2	1	2	0	0	3	3	3	3	3	3	3	3	3	4	6	5	2	5	5	7	3	5	3	2	3	5	4	3	4
617	1	1	0	1	3	体に良さそう	1	3	1	2	0	0	2	2	1	1	2	2	2	1	3	3	5	6	4	3	4	4	5	4	4	4	4	5	4	4	1
618	1	1	1	1	3	大豆ミート	1	2	1	2	0	0	3	3	3	3	3	3	3	3	4	4	4	4	6	4	4	4	4	2	4	4	4	4	4	4	1
619	1	1	0	1	4	おいしくない	1	3	1	3	1	3	1	1	1	1	2	2	2	1	3	3	3	3	3	2	3	3	3	3	2	3	3	1	3	3	1
620	1	1	0	2	4	なし	3	3	1	1	1	2	1	2	1	1	2	2	2	1	4	4	4	4	4	4	4	4	4	4	4	4	4	4	4	4	2
621	1	1	1	1	3	ビーガンやベジタリアンの方が、動物肉の代わりに、肉に近い味付けや食感をした他の食べ物を使うこと。豆腐ハンバーグなどが思いつきます。	1	3	1	2	0	0	2	1	1	1	2	2	2	1	3	5	6	4	5	3	6	5	5	3	5	3	3	5	3	3	2
622	1	1	0	1	4	わからん	3	3	1	1	1	3	1	1	2	2	2	1	1	2	3	3	5	3	4	4	5	3	3	3	3	4	5	2	3	2	2
623	1	1	1	1	4	大豆	3	3	1	1	1	2	1	2	1	2	2	1	2	2	1	5	6	3	5	2	6	3	3	1	2	2	2	2	2	2	2
624	1	1	0	2	4	なし	3	3	1	3	1	2	3	3	3	3	3	3	3	3	4	4	4	4	4	4	4	4	4	4	4	4	4	4	4	4	3
625	1	1	0	1	3	大豆、ヴィーガン用、あまりジューシーでない	1	1	1	2	0	0	1	3	2	2	3	2	1	1	3	2	3	6	2	5	5	5	7	5	5	3	3	5	3	4	1
626	1	1	1	1	4	あまり聞かない	3	3	1	3	1	2	3	2	1	3	3	2	2	1	1	6	5	1	6	2	7	5	3	2	5	3	2	5	3	3	1
627	1	1	0	1	4	美味しくない	3	3	1	2	0	0	3	3	3	3	3	3	3	3	1	7	7	1	1	1	7	4	4	4	7	5	4	4	4	4	1
628	1	1	0	5	4	なし	3	3	1	3	1	3	3	3	3	3	3	3	3	3	4	3	4	4	4	4	4	4	4	4	4	4	4	4	4	4	1
629	1	1	0	2	4	輸入肉	3	3	1	3	1	2	1	2	3	2	1	1	2	1	5	7	4	3	5	2	3	5	4	5	4	5	5	4	3	6	4
630	1	1	0	1	4	特になし	3	3	1	1	1	2	3	3	3	3	3	3	3	3	1	4	4	4	4	4	4	4	4	4	4	4	4	4	4	4	1
631	1	1	0	1	2	何かやっぱり大豆だと違うし、培養で人が作った肉は食いたくない	1	2	1	1	1	2	2	1	1	2	2	1	2	2	4	6	7	3	1	4	7	7	5	4	7	6	5	7	7	1	3
632	1	1	0	1	3	オートミール	1	3	1	3	1	2	1	2	2	1	2	2	2	1	5	3	6	5	3	5	2	5	6	5	5	5	5	5	5	4	1
633	1	1	1	1	1	特になし	1	3	1	1	1	2	3	1	2	2	1	2	1	2	2	4	3	6	6	2	6	2	6	6	5	5	6	7	6	6	3
634	1	1	1	1	1	なし	3	3	1	2	0	0	3	3	3	3	3	3	3	3	4	4	4	4	4	4	4	4	4	4	4	4	4	4	4	4	2
635	1	1	0	2	4	大豆	1	3	1	1	1	1	1	1	1	1	1	1	2	2	4	4	2	3	3	2	2	2	2	2	4	4	4	4	4	4	2
636	1	1	1	1	3	代えのお肉？	1	3	1	1	1	3	1	3	3	3	3	3	3	3	1	5	1	1	5	4	5	6	3	4	5	5	4	6	7	6	1
637	1	1	1	1	3	思いつかない	2	1	1	2	0	0	3	2	2	1	3	1	3	3	3	2	4	6	4	1	4	3	5	1	4	2	3	6	2	3	2
638	1	1	1	1	1	脂が少ない	1	2	1	2	0	0	1	2	1	1	2	1	2	1	1	6	7	2	5	1	7	5	1	1	1	1	1	5	2	1	2
639	1	1	1	1	3	大豆	1	2	1	2	0	0	1	2	1	2	1	1	2	2	2	5	4	3	4	2	5	2	2	2	5	5	5	4	5	5	1
640	1	1	0	1	1	美味しさは劣る	1	3	1	2	0	0	1	3	2	3	3	3	3	1	4	1	3	3	5	4	5	4	5	3	6	5	5	5	5	5	1
641	1	1	1	1	3	肉の代わりで肉っぽいもの	3	3	1	3	1	2	1	1	2	2	1	2	2	1	1	5	2	4	4	6	2	4	3	3	5	3	3	5	4	3	3
642	1	1	1	1	1	大豆ミート	1	3	1	2	0	0	1	2	1	1	2	2	2	1	3	3	3	3	5	3	6	2	3	3	5	3	3	5	3	3	2
643	1	1	0	1	4	わからない	3	3	1	1	1	3	1	2	1	2	2	1	2	2	4	4	4	4	4	4	4	4	4	4	4	4	4	4	4	4	1
644	1	1	0	3	4	そっくり	3	3	1	3	1	2	2	2	1	1	1	2	2	1	3	4	5	2	4	3	6	2	3	2	4	4	4	5	5	4	1
645	1	1	1	1	3	初めて聞いたため分からない	3	3	1	3	1	2	1	2	1	1	3	1	2	2	3	2	2	3	5	5	7	5	3	3	5	5	4	5	5	5	3
646	1	1	1	1	3	大豆ミート、ヘルシー、ダイエット向き	1	3	1	2	0	0	1	2	2	2	1	2	1	1	3	5	5	5	4	3	5	3	5	1	7	5	3	6	3	5	1
647	1	1	1	1	4	おいしくなさそう	1	3	1	2	0	0	1	2	1	1	1	2	2	1	3	4	3	3	3	3	6	4	6	2	4	3	3	6	2	4	1
648	1	1	1	1	4	分からない	3	3	1	1	1	2	3	3	3	3	3	3	3	3	2	2	4	4	1	3	6	6	1	2	6	4	3	4	4	5	1
649	1	1	1	1	1	大豆ミート	1	2	1	2	0	0	1	2	2	1	1	2	2	1	3	2	6	5	2	3	5	5	2	3	5	2	3	5	4	2	1
650	1	1	1	1	2	美味しくない	1	3	1	1	1	3	1	2	2	2	1	2	1	1	3	3	5	6	4	6	5	4	3	4	6	5	5	5	4	4	2
651	1	1	1	1	4	大豆	1	1	1	1	1	3	1	2	2	2	1	2	1	2	2	4	4	5	4	4	4	5	5	5	5	5	5	5	5	5	1
652	1	1	0	3	4	大豆などの植物由来や培養肉など動物に拠らない食肉で、環境問題や飢餓の解消が期待される次世代に重要なフードテック。	1	1	1	2	0	0	2	2	2	1	2	2	1	1	1	5	7	1	5	1	7	7	1	1	4	3	1	5	2	3	1
653	1	1	0	1	1	豆腐、大豆ミート	1	3	1	2	0	0	1	1	3	2	3	2	2	1	4	4	1	3	6	1	6	6	3	1	7	2	2	2	1	3	1
654	1	1	1	1	2	おいしくない ヘルシー	1	1	1	2	0	0	1	2	1	2	1	1	2	2	3	4	3	5	2	6	2	2	5	6	4	2	4	2	2	2	2
655	1	1	0	1	4	高タンパク質で廉価、大量生産ができる	1	1	1	2	0	0	3	3	1	2	1	2	2	1	1	1	6	7	1	1	5	1	7	6	6	6	5	6	5	5	1
656	1	1	1	1	1	大豆ミート	1	3	1	2	0	0	1	2	2	2	1	2	2	1	5	4	6	4	3	4	3	4	6	4	5	4	5	5	3	5	1
657	1	1	0	1	4	ハンバーガーに使われている肉	1	1	1	2	0	0	3	2	2	2	3	2	2	3	4	4	2	2	4	4	3	1	6	2	3	4	3	4	3	4	2
658	1	1	0	1	3	環境に良い	1	1	1	2	0	0	2	2	2	2	1	3	2	3	2	5	6	4	5	2	5	3	3	3	7	5	6	5	5	6	2
659	1	1	0	1	2	美味しくない、大豆	1	3	1	2	0	0	3	3	3	3	3	2	3	1	1	2	5	1	3	6	3	1	5	3	1	1	5	4	3	1	1
660	1	1	1	1	3	大豆ミート	1	3	1	2	0	0	2	2	2	2	1	2	2	1	3	2	6	5	2	4	3	5	6	6	5	3	2	5	5	2	3
661	1	1	0	1	4	あかた	3	3	1	2	0	0	1	3	3	3	1	1	2	2	6	2	5	6	4	6	5	3	4	6	4	4	4	4	5	4	3
662	1	1	1	1	4	ウインナー	3	3	1	2	0	0	3	3	3	2	3	3	3	3	1	1	1	1	1	1	1	1	1	1	1	1	1	1	1	1	1
663	1	1	0	1	3	虫	1	3	1	2	0	0	3	2	1	1	3	3	3	3	2	4	3	4	4	5	4	3	5	4	5	4	5	5	4	4	1
664	1	1	1	1	4	ソイパティ	3	3	1	3	1	2	3	2	2	1	3	2	2	1	1	5	7	1	5	1	7	2	5	2	3	2	2	4	2	3	2
665	1	1	1	1	4	聞いたことないです	3	3	1	1	1	2	2	2	2	1	3	3	2	1	1	4	7	4	5	2	7	5	3	1	6	3	3	2	2	2	1
666	1	1	1	1	3	かたそう	1	3	1	1	1	2	1	3	2	3	3	3	3	1	2	4	7	3	5	2	6	5	1	2	6	3	3	5	4	4	1
667	1	1	1	4	4	なし	3	3	1	3	1	2	3	3	3	3	3	3	3	3	6	2	3	4	3	4	4	4	3	4	5	5	4	5	2	5	3
668	1	1	1	2	4	あまりよくわからない	3	3	1	2	0	0	1	2	1	2	1	1	2	2	4	4	4	4	5	4	4	5	4	4	4	4	4	4	4	4	1
669	1	1	0	4	1	牛タン	1	1	1	2	0	0	2	2	2	2	2	2	2	2	4	4	6	4	4	6	5	6	6	6	4	4	4	3	2	2	1
670	1	1	0	1	4	あ	3	3	1	3	1	3	3	3	3	3	3	3	3	3	4	4	4	4	4	4	4	4	4	4	4	4	4	4	4	4	1
671	1	1	1	2	4	健康に良い ヘルシー 高タンパク	1	3	1	2	0	0	3	3	3	3	3	3	3	3	1	3	7	2	4	2	6	6	5	1	7	6	4	4	5	4	2
672	1	1	1	3	4	なし	3	3	1	3	1	2	3	3	3	3	3	2	2	2	3	4	6	3	4	3	4	6	4	4	5	4	3	5	4	4	3
673	1	1	1	1	3	大豆	1	1	1	2	0	0	1	2	1	1	1	2	2	2	4	5	3	6	3	6	3	3	6	6	2	2	3	3	3	3	2
674	1	1	0	1	1	松阪牛	3	3	1	3	1	2	3	3	3	3	3	3	3	3	4	4	4	4	4	4	4	4	4	4	4	4	4	4	4	4	4
675	1	1	1	1	1	大豆肉	1	2	1	1	1	2	1	2	1	2	2	1	2	1	3	5	6	3	3	5	6	5	5	5	5	5	5	6	5	3	3
676	1	1	0	1	2	大豆肉など	1	1	1	2	0	0	1	2	1	2	3	2	2	1	4	2	2	5	1	5	1	2	7	3	1	1	1	1	2	1	2
677	1	1	1	1	1	大豆肉	3	3	1	2	0	0	1	2	3	2	3	2	1	2	2	3	6	5	2	2	7	5	5	3	5	3	5	4	2	1	1
678	1	1	1	1	3	思い浮かばないです	3	3	1	2	0	0	1	2	2	2	1	1	2	1	5	3	6	6	4	6	3	6	6	4	7	6	2	6	6	6	1
679	1	1	1	1	3	魚などを細かく砕いて肉っぽく見せる感じ	1	3	1	2	0	0	1	2	1	2	1	1	2	2	4	3	2	4	3	5	4	3	6	5	3	5	3	4	3	3	1
680	1	1	0	1	4	あまり美味しくない	2	1	1	2	0	0	1	2	1	1	1	2	2	1	3	4	5	5	4	5	4	5	5	4	5	5	5	5	5	5	2
681	1	1	1	1	4	わからない	3	3	1	1	1	2	3	3	3	3	3	3	3	3	1	2	2	2	2	2	7	2	1	2	2	3	2	2	3	3	2
682	1	1	1	1	2	オートミール	1	3	1	3	1	2	1	2	1	2	1	2	2	1	2	5	5	2	4	2	7	3	3	1	6	6	5	5	5	5	2
683	1	1	1	1	2	謎肉	1	3	1	2	0	0	1	1	1	1	1	1	2	2	3	3	3	5	3	4	5	4	5	5	5	5	5	3	3	3	2
684	1	1	0	1	4	人工肉	1	3	1	1	1	3	3	2	2	2	2	1	1	1	3	3	5	5	6	4	5	4	3	3	5	4	4	4	3	4	2
685	1	1	0	1	4	大豆肉	2	1	1	3	1	2	3	3	3	3	3	3	3	3	4	5	3	5	3	5	4	3	2	3	5	3	3	5	3	3	3
686	1	1	1	1	2	肉が嫌いな人でも食べやすそう	3	3	1	3	1	2	1	2	1	1	1	2	2	1	2	6	7	1	6	1	7	5	1	1	4	2	2	6	2	5	1
687	1	1	1	1	4	わからない	3	3	1	1	1	3	3	3	3	3	3	3	3	3	4	4	4	4	4	4	4	4	4	4	4	4	4	4	4	4	1
688	1	1	1	1	4	わからない	3	3	1	3	1	2	3	2	1	1	2	2	2	1	2	4	4	4	5	2	6	3	3	2	4	4	4	4	4	4	2
689	1	1	0	1	3	美味しくない	1	1	1	2	0	0	1	1	2	2	2	1	2	2	2	5	6	4	4	4	4	4	4	4	4	4	4	4	4	4	3
690	1	1	0	1	3	肉の風味が消える	1	3	1	3	1	1	1	2	1	2	2	1	2	2	1	7	7	4	4	7	7	7	7	1	7	4	2	7	7	7	2
691	1	1	0	1	1	大豆肉、人工肉	1	1	1	1	1	2	2	1	2	1	2	2	1	1	5	4	5	7	2	6	2	4	6	5	4	5	4	4	4	4	2
692	1	1	0	1	3	わからない	3	3	1	1	1	1	1	1	1	1	1	1	3	1	4	4	4	4	4	4	4	4	4	4	4	4	4	4	4	4	1
693	1	1	0	1	4	特になし	3	3	1	1	1	2	3	3	3	3	3	3	3	3	1	7	7	1	1	1	7	4	1	1	4	1	1	1	1	1	1
694	1	1	0	1	1	豆腐	1	3	1	3	1	1	2	2	2	1	1	2	2	1	3	5	2	5	4	1	6	7	5	3	7	4	5	7	5	3	1
695	1	1	0	2	1	さたはた	2	1	1	2	0	0	2	2	1	2	1	2	1	1	4	2	2	2	5	1	3	3	1	2	2	4	3	2	3	3	3
696	1	1	1	1	4	美味しく思えない 詳しく知らない	1	1	1	3	1	2	1	2	2	2	2	1	2	2	2	5	6	5	3	4	5	4	3	3	5	4	4	3	5	4	1
697	1	1	1	1	1	大豆	1	3	1	2	0	0	1	2	2	2	2	2	1	1	4	5	6	4	4	4	6	5	4	4	6	6	6	5	5	4	1
698	1	1	0	1	1	わからない	3	3	1	1	1	3	1	2	1	1	2	2	2	1	3	3	4	5	3	5	5	5	5	5	4	5	3	4	4	4	4
699	1	1	0	1	1	大豆	1	1	1	3	1	1	1	1	1	1	1	1	1	1	5	1	4	5	5	4	2	4	2	2	4	1	5	2	2	5	1
700	1	1	1	1	4	栄養が少なさそう	3	1	1	2	0	0	1	2	2	2	1	2	2	1	3	6	7	5	1	1	7	3	6	6	5	6	3	6	4	6	1
701	1	1	0	1	3	特に無し	3	3	1	3	1	2	2	3	3	2	2	2	2	1	5	5	5	5	5	5	5	5	5	5	4	4	4	4	4	4	4
702	1	1	1	1	3	なし	3	3	1	3	1	2	1	2	1	2	1	2	2	1	2	4	5	2	5	2	6	2	3	2	2	6	4	4	5	4	2
703	1	1	0	2	2	美味い	1	2	1	2	0	0	2	2	2	1	2	1	1	1	2	3	1	6	5	6	5	5	5	4	2	5	5	5	5	5	2
704	1	1	0	1	3	大豆	3	3	1	3	1	2	2	2	2	2	1	1	2	1	4	4	5	5	4	3	5	5	5	4	5	6	5	6	5	5	1
705	1	1	1	1	2	大豆	1	3	1	1	1	2	1	3	2	2	3	2	2	1	5	5	7	6	3	6	6	6	6	6	7	7	7	7	7	7	3
706	1	1	0	1	4	大豆ミート	1	3	1	3	1	2	3	3	3	3	3	3	3	3	4	4	4	4	4	4	4	4	4	4	4	4	4	4	4	4	1
707	1	1	0	1	1	豆製品	1	2	1	2	0	0	1	2	1	2	1	2	2	1	5	4	5	6	2	6	2	5	5	5	3	3	3	3	3	3	1
708	1	1	0	1	4	代わりの肉 基本の生活通りの肉とは品の悪い肉	3	3	1	1	1	2	3	2	1	2	1	2	1	1	4	6	4	3	4	5	3	2	1	4	4	3	5	6	3	6	4
709	1	1	1	1	1	わからない	1	1	1	2	0	0	2	3	3	2	2	1	2	3	4	4	5	4	4	3	3	3	6	4	4	5	4	3	5	4	1
710	1	1	1	1	4	大豆	1	3	1	2	0	0	1	2	1	2	1	1	2	2	3	5	5	5	5	3	6	4	4	3	5	5	3	5	4	3	1
711	1	1	0	3	3	特に無し	1	2	1	1	1	1	3	2	2	1	2	2	1	1	4	6	2	4	4	3	5	1	4	3	4	6	4	3	3	5	3
712	1	1	0	1	4	あまり美味しくなさそう、身体には普通の肉より良さそう	1	3	1	2	0	0	1	2	2	2	2	2	2	1	2	4	6	3	6	2	6	5	1	2	2	2	2	7	2	5	2
713	1	1	0	1	4	美味しくなさそう	1	3	1	1	1	3	1	1	1	2	2	2	1	1	2	2	2	7	2	7	1	2	3	7	5	3	1	2	1	3	2
714	1	1	0	1	2	きもい	1	1	1	3	1	1	1	1	1	1	1	1	1	1	5	4	2	3	7	3	6	4	2	5	7	1	2	5	4	1	1
715	1	1	0	1	4	カップヌードルの謎肉	1	3	1	1	1	3	1	1	1	1	1	1	1	1	3	3	3	2	1	1	5	4	4	5	4	5	3	3	4	4	1
716	1	1	1	1	2	肉だと思うと本物の肉との乖離が気になって美味しくなく感じられる。	1	3	1	3	1	2	1	2	1	2	1	1	2	2	3	5	3	5	2	2	5	4	5	3	5	4	3	3	3	3	2
717	1	1	1	1	3	大豆ミート	3	3	1	2	0	0	1	2	1	1	1	1	2	1	3	3	3	5	3	5	3	3	5	4	5	4	3	5	5	5	1
718	1	1	0	1	3	美味しいのか？	1	2	1	1	1	2	1	2	2	2	2	1	2	1	3	2	5	4	4	3	5	4	3	4	4	4	4	4	4	4	2
719	1	1	0	1	3	なし	3	3	1	2	0	0	1	1	1	1	1	1	1	1	3	4	3	5	3	5	4	3	5	4	4	3	6	4	4	4	1
720	1	1	1	1	3	豆腐ハンバーグ	3	3	1	2	0	0	3	3	3	3	3	3	3	3	4	4	4	3	4	3	4	5	5	4	4	4	4	4	4	4	1
721	1	1	1	1	1	魚肉ソーセージ	3	3	1	2	0	0	1	3	2	2	1	3	2	1	3	3	5	5	4	4	5	4	5	4	5	5	5	5	4	4	1
722	1	1	0	1	4	なし	1	3	1	2	0	0	1	2	1	1	3	2	2	1	2	3	4	4	4	3	4	3	4	4	4	2	2	2	2	2	2
723	1	1	0	1	1	草	1	3	1	2	0	0	2	1	1	1	2	1	1	1	7	1	7	1	7	1	7	7	1	1	7	7	1	7	7	7	1
724	1	1	0	1	4	肉のような食べ物	3	2	1	2	0	0	1	2	1	1	1	2	1	1	1	2	1	1	4	2	2	4	1	4	4	6	4	1	1	1	2
725	1	1	1	1	3	大豆ミート	1	1	1	2	0	0	3	3	3	3	3	3	3	3	1	3	7	4	4	1	7	7	7	1	6	6	6	6	5	7	1
726	1	2	1	3	3	な	3	3	1	3	1	1	2	2	2	1	2	2	2	2	6	3	3	4	3	3	3	3	4	3	4	4	3	3	5	4	1
727	1	2	1	3	3	なし	2	1	1	3	1	2	2	2	2	3	1	2	2	2	5	6	2	6	5	2	6	4	2	5	5	6	2	5	4	3	3
728	1	2	1	4	1	高い	1	3	1	2	0	0	3	1	2	3	3	3	1	3	6	4	5	5	4	4	4	5	5	4	5	5	5	5	5	5	2
729	1	2	1	1	3	体にいい	1	1	1	3	1	2	2	1	2	2	2	1	1	1	3	3	3	4	3	4	4	5	1	3	1	2	5	7	4	5	2
730	1	2	0	1	4	知らない	3	3	1	2	0	0	3	3	3	3	3	3	3	3	4	4	4	5	6	4	5	4	2	4	4	4	4	4	4	4	1
731	1	2	0	1	4	特になし	1	3	1	2	0	0	1	3	2	1	1	3	2	2	2	3	3	4	5	2	5	4	3	3	5	4	4	5	5	5	2
732	1	2	0	5	3	美味しいのか不安	1	3	1	2	0	0	2	2	1	2	1	2	1	2	1	7	7	1	7	1	7	1	1	3	7	7	7	7	7	7	4
733	1	2	1	4	3	豆	1	3	1	2	0	0	1	1	2	1	1	2	1	1	2	2	5	6	3	5	5	5	6	4	5	5	4	5	3	5	1
734	1	2	0	1	3	大豆ミート	1	1	1	1	1	2	2	1	2	1	2	1	1	1	4	4	6	3	4	4	5	4	5	5	4	4	4	4	4	4	2
735	1	2	1	1	2	安い	1	1	1	3	1	2	1	1	2	2	2	3	2	1	2	2	2	4	2	3	3	3	4	4	4	3	3	6	7	4	1
736	1	2	1	1	1	大豆ミート	1	3	1	2	0	0	1	1	2	2	1	1	1	1	3	4	5	5	5	3	5	3	5	3	5	3	5	4	3	3	3
737	1	2	1	1	3	肉の見た目をしているが、肉では無いもの	1	3	1	3	1	1	1	1	2	2	1	2	1	1	3	2	4	3	5	2	3	5	5	4	6	5	6	5	4	5	2
738	1	2	1	4	4	体に悪そう	3	2	1	1	1	3	1	1	2	2	3	2	2	2	5	5	6	4	5	4	5	6	4	3	5	6	4	5	4	5	2
739	1	2	0	1	2	味が変	1	1	1	1	1	3	1	2	1	2	1	2	2	1	5	5	5	5	5	6	6	5	4	5	4	4	5	5	5	5	3
740	1	2	1	1	4	なし	3	3	1	3	1	2	3	3	3	3	3	3	3	3	7	7	4	1	4	7	6	1	1	1	1	1	1	2	1	1	1
741	1	2	0	1	4	なし	3	3	1	1	1	2	1	1	2	1	1	2	2	2	3	2	2	2	3	2	3	3	6	5	6	5	4	5	6	5	2
742	1	2	1	1	1	大豆ミート	1	3	1	2	0	0	1	1	2	1	1	1	1	1	5	4	5	4	3	2	6	3	5	4	6	5	5	5	4	4	1
743	1	2	1	1	1	ヘルシー 大豆ミート	1	3	1	2	0	0	1	1	2	2	2	2	1	1	3	4	4	3	5	3	6	4	2	2	5	5	4	5	4	5	2
744	1	2	0	1	4	わからない	3	3	1	2	0	0	1	1	2	1	2	2	2	1	4	4	5	5	4	5	5	5	3	4	3	3	3	4	3	2	2
745	1	2	1	1	3	大豆を使用している	3	3	1	2	0	0	1	1	2	1	1	1	1	1	3	3	3	5	3	5	3	3	5	5	3	3	3	5	3	5	1
746	1	2	0	1	1	大豆の肉	3	2	1	2	0	0	3	3	3	3	3	3	3	3	4	4	6	2	2	2	2	6	7	4	2	4	4	4	4	4	2
747	1	2	0	1	3	大豆	1	1	1	2	0	0	2	1	2	1	1	2	2	2	3	4	5	6	3	6	3	3	6	6	6	5	5	6	3	6	2
748	1	2	0	1	4	ああああ	3	3	1	3	1	3	3	3	3	3	3	3	3	3	4	4	4	4	4	4	4	4	4	4	4	4	4	4	4	4	1
749	1	2	0	1	3	品質	3	3	1	3	1	2	1	1	2	1	1	1	1	1	5	3	6	5	3	4	6	4	5	4	5	5	5	5	5	5	2
750	1	2	0	1	1	大豆ミート	3	3	1	1	1	3	2	2	3	3	3	3	3	3	4	3	4	4	4	4	4	4	3	4	4	4	4	4	4	3	1
751	1	2	1	1	4	本物より美味しくない 値段が高い	1	3	1	2	0	0	1	1	2	1	2	2	1	1	4	4	5	4	5	3	5	4	6	3	3	2	2	2	2	2	1
752	1	2	1	2	1	普通においしいならあり	3	3	1	2	0	0	1	1	2	2	2	2	2	1	4	4	4	4	4	4	4	4	4	4	6	6	6	6	6	6	2
753	1	2	0	1	3	大豆ミート	1	3	1	1	1	2	1	1	2	1	1	2	1	1	3	5	6	2	6	3	6	5	2	3	7	4	4	5	4	4	2
754	1	2	0	1	4	昆虫食	3	3	1	1	1	2	1	3	2	1	3	3	3	3	4	3	4	4	5	5	4	4	5	4	4	4	4	4	4	4	1
755	1	2	1	1	4	なし	3	3	1	3	1	2	3	3	3	3	3	3	3	3	7	5	4	5	4	4	4	4	4	4	7	3	3	3	3	3	1
756	1	2	0	1	1	大豆肉	1	1	1	2	0	0	1	1	2	1	1	1	2	1	5	2	5	6	2	5	2	3	5	5	5	5	5	5	5	4	2
757	1	2	1	1	3	大豆ミート	1	3	1	1	1	2	1	3	2	2	1	3	2	3	3	5	6	6	4	5	3	6	7	3	5	4	3	6	5	5	4
758	1	2	1	1	1	大豆や豆腐	1	3	1	2	0	0	1	3	1	1	1	3	1	1	5	3	5	5	5	5	3	4	6	2	5	5	4	5	5	4	2
759	1	2	0	1	4	わからない	3	3	1	3	1	2	1	2	2	2	2	2	2	1	5	4	3	4	3	4	4	7	6	4	6	6	3	2	6	4	1
760	1	2	1	1	4	浮かばない	1	3	1	2	0	0	1	1	2	1	1	1	2	2	2	5	6	6	4	3	6	4	6	3	6	4	4	4	4	4	2
761	1	2	0	1	3	大豆	3	3	1	3	1	1	1	1	2	1	1	1	2	1	3	4	4	5	5	4	6	5	4	4	6	5	6	5	5	5	2
762	1	2	1	1	1	大豆ミート	3	3	1	2	0	0	1	1	2	3	3	2	3	3	3	3	3	3	2	4	5	5	4	2	3	3	3	3	3	3	3
763	1	2	1	1	3	冷凍こんにゃく	1	3	1	3	1	2	1	1	2	1	1	1	1	1	5	4	5	5	3	5	3	4	5	5	5	5	3	4	3	2	2
764	1	2	0	1	3	豆腐	1	3	1	1	1	3	2	1	2	1	2	1	1	1	4	4	3	4	5	4	6	3	4	3	3	2	3	4	5	3	3
765	1	2	1	1	3	ヘルシー	2	1	1	3	1	2	1	1	2	2	1	1	1	1	4	4	1	7	1	7	1	4	3	7	6	6	6	6	5	4	2
766	1	2	0	5	4	わからない	3	3	1	1	1	2	3	3	3	3	3	3	3	3	4	4	4	4	4	4	4	4	4	4	4	5	3	4	4	5	1
767	1	2	1	1	4	不味そう	3	3	1	1	1	2	1	2	2	2	1	2	2	1	5	5	5	4	4	4	7	4	4	3	4	3	5	6	4	5	1
768	1	2	0	1	4	ヘルシー	1	2	1	1	1	2	1	1	2	1	2	1	2	1	3	1	4	6	5	5	4	5	6	6	4	5	6	5	6	6	3
769	1	2	1	1	4	特にないです	3	3	1	1	1	3	1	1	2	3	3	2	1	3	4	5	4	5	3	4	5	5	4	4	5	3	3	3	2	4	3
770	1	2	1	1	2	大豆	1	3	1	2	0	0	1	1	2	1	2	2	2	2	3	5	7	3	4	3	6	3	6	3	6	6	6	7	4	3	2
771	1	2	1	1	2	大豆ミート	1	3	1	2	0	0	1	1	2	1	1	2	2	2	5	4	5	6	3	4	5	5	5	4	5	5	5	5	5	4	2
772	1	2	1	4	4	なし	3	3	1	1	1	2	3	3	3	3	3	3	3	3	4	4	4	4	4	4	4	4	4	4	4	4	4	4	4	4	1
773	1	2	0	1	3	ちくわ	3	3	1	2	0	0	2	1	2	1	1	2	1	1	4	1	1	6	3	6	5	1	7	5	5	5	3	2	1	2	2
774	1	2	1	2	4	分からない	3	3	1	2	0	0	1	1	3	3	3	3	3	3	1	4	4	5	4	4	5	2	5	4	5	3	3	3	3	5	2
775	1	2	0	1	1	大豆	3	3	1	1	1	3	2	1	1	1	2	1	2	2	3	5	2	3	3	5	3	3	6	5	6	5	3	5	3	3	2
776	1	2	1	1	4	大豆	1	3	1	2	0	0	2	1	2	1	2	2	1	1	3	3	3	6	5	5	2	2	6	3	3	2	2	5	3	3	3
777	1	2	0	1	3	なし	3	3	1	2	0	0	3	2	3	3	3	3	3	3	4	3	4	4	4	4	5	2	5	5	4	6	6	3	3	7	1
778	1	2	0	1	4	とくになし	2	2	1	3	1	2	2	2	3	2	3	2	2	3	5	4	5	5	5	3	5	4	5	4	4	5	5	5	5	4	2
779	1	2	0	1	4	大豆	1	1	1	1	1	2	1	2	2	1	1	2	2	1	4	4	2	2	1	2	1	1	1	1	2	2	2	1	1	1	2
780	1	2	0	1	3	健康に良さそう	3	3	1	2	0	0	2	1	2	1	1	1	1	1	2	3	5	5	5	3	5	4	4	3	5	4	3	4	4	3	1
781	1	2	0	1	4	特になし	1	1	1	2	0	0	2	2	2	1	1	1	2	1	2	3	4	3	2	3	1	4	3	2	4	4	2	4	2	3	1
782	1	2	1	1	1	大豆ミート	1	3	1	2	0	0	1	1	3	1	1	3	1	3	4	4	6	5	6	3	6	5	5	2	6	6	5	5	5	5	3
783	1	2	1	1	2	ダイズミート	1	2	1	2	0	0	1	1	2	2	1	3	3	1	3	3	2	2	2	5	3	2	6	3	4	5	3	5	4	3	1
784	1	2	1	1	4	美味しくなさそう	3	3	1	2	0	0	3	3	3	2	2	1	3	2	6	3	4	3	5	4	4	6	3	4	4	4	5	4	4	5	1
785	1	2	1	1	1	大豆ミート	1	3	1	2	0	0	1	1	2	2	1	3	2	1	3	5	7	1	3	1	7	5	1	1	6	3	3	6	3	4	1
786	1	2	1	1	1	大豆ミート	1	3	1	2	0	0	1	1	2	1	1	1	2	1	5	3	5	6	3	6	2	4	7	4	6	5	4	5	3	5	2
787	1	2	1	1	3	動物の肉ではなく人工的に作られているもの	1	3	1	2	0	0	1	3	2	1	1	3	3	1	2	5	2	5	2	2	5	2	3	3	3	3	3	2	4	3	2
788	1	2	0	1	1	大豆	3	3	1	1	1	3	3	3	3	3	3	3	3	3	3	1	1	7	7	7	1	1	7	7	7	7	1	7	1	1	1
789	1	2	1	1	3	すごそう	3	3	1	2	0	0	1	1	2	1	2	1	1	1	5	2	7	7	1	7	7	7	7	7	7	7	7	7	4	3	1
790	1	2	1	1	1	大豆をお肉風に加工している感じ？	3	3	1	1	1	2	2	1	2	2	2	1	1	1	5	1	5	4	5	4	7	2	5	2	1	4	7	3	3	4	2
791	1	2	0	1	3	食べたら、どういう影響が出るか分からない。	1	3	1	2	0	0	2	1	2	1	2	1	1	1	2	6	6	3	5	2	7	5	6	2	2	5	2	2	2	2	1
792	1	2	0	2	4	少し悪そう	3	3	1	2	0	0	3	3	3	3	3	3	3	2	3	2	2	5	5	5	5	5	5	5	5	5	4	4	4	2	1
793	1	2	1	1	4	肉っぽくない。素材の味がしてしまう。	3	3	1	3	1	3	3	3	3	3	3	3	3	3	4	4	4	4	4	4	4	4	4	4	4	4	4	4	4	4	1
794	1	2	0	1	1	わからない	1	3	1	1	1	2	2	1	2	1	2	2	2	1	1	4	3	7	1	6	2	2	4	7	4	4	4	4	4	5	1
795	1	2	1	1	2	豆腐	1	3	1	2	0	0	2	1	2	1	1	1	1	2	2	2	6	6	5	2	5	2	6	3	5	3	2	2	4	2	2
796	1	2	1	1	3	なし	3	3	1	3	1	2	3	3	3	3	3	3	3	3	3	4	5	4	3	4	5	4	4	4	4	4	4	4	4	4	2
797	1	2	0	4	1	豆腐、大豆	1	2	1	1	1	2	2	2	2	1	1	1	2	2	4	4	5	5	4	4	5	4	4	5	5	4	5	5	5	5	2
798	1	2	0	1	3	もさもさしている	1	3	1	3	1	1	1	1	3	2	3	3	3	3	4	5	5	6	3	5	5	4	2	2	4	4	4	4	4	4	3
799	1	2	0	1	3	大豆等の謎肉	1	3	1	3	1	2	1	1	2	2	3	3	1	1	4	3	7	6	4	4	4	4	4	4	4	4	4	4	4	4	1
800	1	2	0	1	4	美味しくなさそう	3	3	1	2	0	0	1	1	2	3	1	2	1	1	2	4	4	3	6	4	4	4	2	3	4	4	3	3	2	4	3
801	1	2	0	1	2	オートミール 大豆 畑の肉	1	3	1	2	0	0	1	1	2	1	1	2	1	3	4	4	5	2	6	3	5	6	3	2	6	5	5	6	6	4	2
802	1	2	1	1	3	大豆	1	3	1	3	1	2	2	1	2	2	1	2	1	1	3	2	6	5	4	4	3	5	5	2	6	4	5	6	5	5	1
803	1	2	1	1	1	ひき肉を豆腐やおから	3	3	1	3	1	1	1	1	2	2	2	1	1	1	4	4	5	6	3	3	4	6	6	6	6	5	6	5	5	5	1
804	1	2	1	1	2	美味しくない	1	3	1	3	1	2	1	1	2	1	2	2	1	2	4	4	4	4	4	4	4	4	4	4	4	4	4	4	4	4	1
805	1	2	1	1	3	大豆のペーストしたやむ	1	3	1	2	0	0	2	1	2	1	2	1	1	1	2	3	5	5	3	2	6	4	5	5	5	4	3	3	3	4	1
806	1	2	1	1	1	大豆ミート	1	3	1	2	0	0	1	2	2	2	1	2	2	1	1	4	5	6	4	6	4	4	4	2	5	5	4	5	4	4	1
807	1	2	0	1	3	ない	1	1	1	1	1	2	1	1	1	2	1	1	3	1	5	3	5	5	3	5	3	6	3	3	5	6	6	4	5	5	3
808	1	2	0	1	3	なし	3	3	1	2	0	0	1	1	1	1	1	1	1	1	4	4	4	4	4	4	4	4	4	4	4	4	4	4	4	4	1
809	1	2	0	1	1	大豆製品	1	3	1	2	0	0	3	3	3	3	3	3	3	3	5	2	6	6	3	3	7	3	5	3	5	5	4	5	5	3	1
810	1	2	1	1	4	よくわからない	3	3	1	1	1	2	3	1	2	3	3	2	3	3	1	2	7	3	1	1	7	6	1	1	4	4	4	4	4	4	1
811	1	2	0	1	3	おいしくない	3	3	1	3	1	2	1	2	2	1	1	2	1	1	4	3	5	5	3	4	5	4	3	4	5	4	4	4	4	4	2
812	1	2	0	1	4	とくになし	3	3	1	3	1	1	3	3	3	3	3	3	3	3	4	4	4	3	5	2	5	2	4	3	4	3	3	4	2	3	2
813	1	2	1	1	1	お豆腐など肉以外出できているが、見た目、食感、味がほぼ肉と同じもの。	1	3	1	2	0	0	1	1	2	1	2	2	1	1	5	1	3	7	1	6	3	5	7	7	6	6	3	5	6	5	2
814	1	2	0	1	3	安そう	2	1	1	1	1	2	2	2	3	2	3	3	3	3	5	7	2	3	5	3	3	4	3	3	4	3	3	4	4	4	1
815	1	2	1	1	1	健康的	1	3	1	1	1	2	1	1	2	1	1	1	1	1	2	4	5	5	4	2	5	3	3	3	5	6	5	5	5	3	2
816	1	2	1	1	3	大豆	3	3	1	2	0	0	1	1	2	2	1	2	1	2	5	3	2	7	2	6	5	5	4	6	5	4	6	4	5	6	4
817	1	2	0	1	2	本物と偽物	3	3	1	2	0	0	3	3	3	3	3	3	3	3	1	7	7	1	7	1	7	4	1	1	1	1	1	1	1	1	1
818	1	2	1	1	4	美味しくなさそう	3	3	1	1	1	2	1	1	1	1	1	1	1	1	3	3	3	3	3	3	4	4	4	5	3	3	3	3	2	2	1
819	1	2	1	1	2	大豆ミート	1	2	1	2	0	0	1	1	2	1	2	2	2	1	3	4	2	4	1	4	4	5	3	4	3	3	2	2	5	6	3
820	1	2	1	1	4	しらない	1	2	1	2	0	0	1	1	2	2	1	2	2	1	4	5	7	7	3	5	5	4	3	5	4	4	4	4	4	4	3
821	1	2	0	5	3	分からない	3	3	1	3	1	1	1	1	1	1	1	1	1	1	4	4	4	5	3	4	4	4	4	4	4	3	3	3	2	4	3
822	1	2	1	1	4	知らない	1	3	1	1	1	3	3	3	3	3	3	3	3	3	2	3	7	1	7	6	4	4	4	1	5	4	4	4	4	4	2
823	1	2	0	1	4	培養肉	2	2	1	3	1	1	3	3	3	3	3	3	3	3	4	6	7	5	1	3	4	7	4	5	5	4	4	4	4	5	3
824	1	2	1	1	1	大豆	1	3	1	3	1	2	2	1	2	1	2	1	1	1	5	3	3	7	1	5	1	1	3	6	5	3	5	5	5	2	2
825	1	2	0	4	4	特になし	3	3	1	3	1	2	2	1	2	2	2	1	2	2	4	4	4	4	4	4	4	3	4	4	4	4	4	4	4	4	2
826	1	2	1	1	3	特になし	3	3	1	1	1	2	1	1	2	3	3	3	3	3	4	4	4	4	4	4	4	4	4	4	4	4	4	4	4	4	2
827	1	2	0	4	3	大豆	1	1	1	1	1	3	1	1	2	2	1	2	2	1	3	3	6	3	4	3	5	5	3	4	5	3	3	4	4	4	2
828	1	2	0	1	1	だいず	1	1	1	2	0	0	2	1	2	1	2	2	1	1	5	4	5	6	2	5	3	5	5	5	5	5	5	6	4	4	1
829	1	2	0	1	3	特にない	3	3	1	2	0	0	1	1	2	1	2	1	1	2	3	3	4	5	4	4	5	4	3	4	4	4	3	5	4	3	4
830	1	2	1	1	1	大豆ミート	1	3	1	2	0	0	1	1	2	1	1	1	2	3	1	2	7	4	4	3	6	4	3	4	7	5	5	5	3	3	2
831	1	2	0	1	1	ダイズミート、健康	1	3	1	2	0	0	3	3	1	3	3	3	1	3	3	5	7	1	4	2	7	5	2	2	6	5	6	6	5	5	2
832	1	2	0	1	1	大豆	1	2	1	2	0	0	1	1	2	2	1	2	1	1	2	5	7	6	1	2	5	5	2	6	6	5	4	4	5	3	2
833	1	2	0	1	4	大豆	3	3	1	3	1	3	3	3	3	3	3	3	3	3	7	6	3	6	6	6	7	6	5	4	6	6	5	7	4	5	1
834	1	2	1	1	2	大豆ミート	3	3	1	1	1	2	1	1	2	1	1	2	1	1	3	2	7	2	6	2	6	5	4	2	4	4	1	2	2	3	2
835	1	2	0	1	3	普通の肉には劣る	3	3	1	3	1	2	1	1	2	1	1	2	2	1	2	1	7	6	4	4	3	1	5	4	5	4	3	5	4	4	2
836	1	2	1	1	4	心配	3	3	1	2	0	0	1	1	2	2	1	2	1	1	4	4	5	4	4	5	4	3	5	4	5	5	5	6	5	4	1
837	1	2	0	1	3	大豆	1	2	1	2	0	0	1	2	2	1	2	1	1	2	2	2	2	2	4	4	4	2	4	3	1	3	3	3	2	2	1
838	1	2	0	1	4	牛や豚、鶏肉の代わり 今話題のコオロギ食と言われるように、カエルや鶏以外の鳥など	3	3	1	2	0	0	1	1	2	1	1	2	2	2	1	6	5	6	6	2	6	6	3	2	6	5	4	5	5	2	3
839	1	2	1	4	2	昆虫食	1	1	1	2	0	0	1	2	2	1	2	1	2	1	3	5	6	4	7	2	7	7	1	2	7	7	3	6	6	6	2
840	1	2	1	1	1	特に無し	1	1	1	1	1	2	2	1	2	2	2	3	2	2	6	2	2	3	2	7	4	5	3	1	4	2	4	3	1	4	2
841	1	2	0	1	4	なし	3	3	1	3	1	3	3	3	3	3	3	3	3	3	5	5	3	4	3	5	4	4	4	5	5	5	5	4	5	5	4
842	1	2	0	1	2	大豆	1	3	1	2	0	0	2	1	2	1	1	1	1	1	5	3	4	5	3	5	3	1	6	4	3	1	1	5	2	1	2
843	1	2	0	1	2	強い味付けパサパサ、マズイ	1	2	1	2	0	0	2	2	2	1	2	2	2	1	2	5	5	6	2	4	4	2	7	5	6	5	4	3	3	5	1
844	1	2	1	1	3	加工食品	1	3	1	2	0	0	1	3	2	3	1	3	1	1	3	3	6	5	4	4	5	3	5	4	5	5	5	5	5	5	1
845	1	2	1	1	3	特になし	3	3	1	2	0	0	1	1	1	1	1	1	1	1	2	2	4	2	3	4	5	2	5	4	4	4	4	4	4	5	1
846	1	2	0	1	4	ない	3	3	1	3	1	3	3	3	3	3	3	3	3	3	4	4	4	4	4	4	4	4	4	4	4	4	4	4	4	4	1
847	1	2	0	1	3	大豆ミート	1	3	1	2	0	0	1	1	2	2	2	2	1	1	2	2	3	4	5	5	2	3	5	2	3	2	2	5	4	4	2
848	1	2	1	1	1	大豆ミート	1	3	1	2	0	0	1	1	1	2	2	3	1	1	2	3	6	5	3	3	6	7	3	3	5	6	4	3	4	2	2
849	1	2	0	1	3	特にない	3	3	1	2	0	0	1	3	3	3	3	3	2	3	4	4	4	4	4	4	4	4	4	4	4	4	4	4	4	4	2
850	1	2	0	1	1	形成肉	1	1	1	1	1	1	1	1	1	1	1	2	2	1	5	1	6	1	1	2	2	3	3	3	1	4	4	3	2	4	1
851	1	2	0	1	3	やややはなた	2	3	1	2	0	0	1	2	1	2	1	1	1	1	6	4	4	4	4	4	2	4	3	4	2	4	5	2	6	2	2
852	1	2	1	4	1	大豆	1	1	1	2	0	0	1	2	1	2	2	1	1	2	3	5	1	3	3	4	5	2	6	4	2	5	4	4	5	5	2
853	1	2	1	1	1	大豆	3	2	1	1	1	2	1	1	2	2	1	1	2	1	5	3	5	5	3	5	3	5	5	5	6	6	6	5	5	5	1
854	1	2	0	2	3	無い	1	1	1	1	1	2	1	1	1	2	2	2	2	2	2	4	3	3	3	5	3	4	4	4	6	3	5	4	4	4	1
855	1	2	1	1	1	豆	1	3	1	1	1	3	2	3	3	3	3	3	3	3	2	4	7	5	4	5	6	6	5	2	7	6	6	5	5	5	2
856	1	2	0	1	4	アライグマ	3	3	1	3	1	2	1	3	2	3	1	2	3	3	1	2	5	3	2	2	7	5	3	1	5	4	3	6	5	3	2
857	1	2	0	1	4	大豆ミート。 野菜などで肉の代わりにして、安価ですませる。	1	1	1	3	1	2	1	2	2	1	2	2	2	1	1	3	3	3	4	4	5	4	5	3	4	6	5	2	3	3	1
858	1	2	1	1	2	大豆を利用したもの。	1	3	1	2	0	0	2	1	2	2	2	1	1	1	3	4	5	6	2	5	3	5	5	5	3	2	3	5	4	1	2
859	1	2	0	1	3	大豆	3	2	1	3	1	1	2	3	1	3	1	3	3	3	2	5	3	1	3	5	1	1	2	1	1	1	1	1	1	1	1
860	1	2	1	1	4	見た目は似せているものの、やはり本物には叶わないと思っている。	3	3	1	2	0	0	1	1	2	3	2	2	1	3	2	6	7	4	6	2	6	6	6	2	5	4	4	3	3	2	3
861	1	2	1	1	4	ない	3	3	1	1	1	2	1	1	2	2	1	2	1	1	2	5	5	1	6	2	7	6	1	2	6	6	6	6	6	6	1
862	1	2	0	3	4	牛肉	3	3	1	2	0	0	3	3	3	3	3	3	3	3	3	4	5	3	4	3	5	4	3	3	3	3	4	4	4	5	1
863	1	2	1	1	4	安い	1	2	1	3	1	2	1	1	2	1	1	1	1	1	6	2	5	3	3	3	5	4	4	4	6	3	2	4	5	4	1
864	1	2	0	3	2	わからない	2	1	1	3	1	2	1	3	3	3	3	3	3	3	5	5	4	5	5	5	3	4	5	4	5	4	6	4	4	6	3
865	1	2	0	5	4	特にない	3	3	1	1	1	1	1	1	1	1	2	1	1	1	4	4	7	4	4	2	6	4	3	4	4	4	4	4	4	4	2
866	1	2	1	1	4	大豆ミート	1	3	1	2	0	0	1	1	2	3	3	3	1	3	3	4	5	2	5	2	6	5	4	2	5	5	5	6	4	4	2
867	1	2	0	1	3	大豆	1	3	1	3	1	1	3	1	3	1	1	2	3	3	1	5	4	2	3	2	3	4	3	5	1	1	3	5	7	5	1
868	1	2	1	1	4	本物の肉を使用していなさそう	3	3	1	3	1	3	1	1	1	1	1	1	1	1	2	3	6	1	2	2	7	4	4	3	4	4	2	2	5	2	1
869	1	2	0	1	4	わからない	3	3	1	1	1	3	2	2	2	2	1	1	1	1	3	4	5	3	1	5	2	3	7	5	3	5	5	3	6	6	1
870	1	2	0	1	4	まめ	1	3	1	2	0	0	1	1	1	1	1	1	2	3	3	3	5	5	6	5	5	6	5	3	3	4	5	4	4	3	2
871	1	2	0	1	3	健康	3	3	1	2	0	0	2	1	1	2	2	2	1	1	4	5	5	4	5	3	5	3	3	3	4	4	3	4	3	4	1
872	1	2	1	1	1	添加物が多そう	1	3	1	2	0	0	1	1	2	1	1	1	1	1	5	5	5	6	2	6	6	6	6	6	6	6	6	6	5	6	3
873	1	2	1	1	4	カップヌードルの謎肉	1	3	1	1	1	3	2	1	2	1	1	1	1	1	1	6	6	5	6	2	5	2	5	2	2	1	1	5	2	3	1
874	1	2	0	1	3	大豆	1	3	1	1	1	2	2	1	2	2	2	1	1	1	5	4	6	5	4	6	2	2	7	4	5	2	4	2	3	5	2
875	1	2	1	1	1	安い	1	3	1	2	0	0	1	1	2	2	1	2	2	1	3	2	2	5	3	3	2	2	5	3	5	5	3	4	3	4	3
876	1	2	1	1	3	大豆	1	1	1	2	0	0	1	1	2	1	2	2	1	2	3	5	2	5	3	3	3	2	6	5	5	3	3	3	3	5	1
877	1	2	1	1	4	違う素材が使われている	3	3	1	2	0	0	3	3	3	2	3	2	1	1	3	5	6	4	6	5	3	1	5	3	1	1	1	1	1	1	1
878	1	2	0	1	2	大豆のお肉	1	1	1	1	1	2	2	1	1	3	2	1	1	3	5	3	5	5	2	5	4	6	4	5	5	5	3	3	5	3	2
879	1	2	1	1	2	コオロギを肉に混ぜたハンバーグ	3	2	1	1	1	3	3	1	1	1	1	2	1	3	1	3	5	6	3	1	5	2	5	3	5	5	5	5	4	4	2
880	1	2	1	3	2	あいうえお	2	2	1	2	0	0	1	1	2	1	1	2	1	2	7	2	6	2	6	2	7	1	6	2	4	7	4	5	3	3	2
881	1	2	0	1	3	最近は品質が向上している	1	2	1	1	1	2	1	2	2	2	1	2	2	1	3	3	3	5	3	2	6	4	5	5	6	6	5	5	5	5	2
882	1	2	1	1	1	ダイズ	1	3	1	2	0	0	1	1	2	1	1	1	1	1	3	3	5	3	5	3	4	3	5	3	5	4	3	5	3	4	3
883	1	2	0	1	3	なし	3	3	1	3	1	2	3	3	3	3	3	3	3	3	4	4	4	3	5	4	3	4	4	3	3	4	5	4	5	3	2
884	1	2	1	1	3	大豆や豆腐を使用したもの	1	1	1	1	1	2	1	1	2	2	1	2	1	1	5	3	5	5	3	5	5	3	5	5	5	5	5	5	5	5	1
885	1	2	0	1	3	大豆ミート	3	3	1	2	0	0	2	1	2	2	3	3	3	1	4	3	4	4	3	4	4	4	5	5	5	5	5	5	5	5	1
886	1	2	1	5	1	動物をと殺していない	1	1	1	1	1	1	2	3	1	2	3	1	3	1	5	3	3	4	3	3	1	1	1	1	7	7	7	7	7	7	1
887	1	2	0	1	1	肉じゃないのに肉	1	3	1	2	0	0	2	1	2	1	1	1	1	1	5	4	7	4	6	3	6	5	4	2	6	6	5	5	6	4	4
888	1	2	1	1	3	大豆ミート	1	2	1	2	0	0	1	1	1	1	2	2	1	1	4	5	3	4	3	4	4	3	5	3	5	3	3	3	4	4	2
889	1	2	0	1	4	きもい	3	3	1	2	0	0	1	1	2	3	2	2	1	3	1	6	6	1	6	1	6	1	1	1	1	1	1	1	1	1	1
890	1	2	0	1	4	思い浮かばない	3	3	1	3	1	1	3	3	1	3	3	3	3	3	1	5	7	4	5	4	5	3	1	3	5	5	4	4	4	4	1
891	1	2	0	1	4	肉の代わりになる食品	1	3	1	2	0	0	2	1	2	1	2	1	1	1	2	5	6	1	6	2	7	6	2	1	2	1	1	2	4	1	1
892	1	2	1	1	3	大豆	1	3	1	2	0	0	2	1	2	2	1	1	1	1	3	1	5	7	4	7	7	1	7	4	7	7	1	7	7	7	1
893	1	2	0	1	3	肉らしさが少ない。 少し物足りない感じがしそう。 想像がつかない。	1	3	1	2	0	0	1	1	2	1	2	1	1	1	1	5	5	3	3	5	5	3	3	4	4	4	5	7	4	1	3
894	1	2	1	1	2	大豆ミート	1	3	1	2	0	0	1	3	2	2	1	3	3	1	5	3	5	6	4	3	5	5	6	4	6	6	5	3	5	4	2
895	1	2	0	1	4	ちゃんとした肉じゃない	2	1	1	2	0	0	1	1	2	1	1	1	1	1	2	2	6	2	6	3	5	3	3	2	5	3	3	2	2	4	2
896	1	2	0	1	4	コオロギ	1	1	1	1	1	3	1	1	2	2	1	2	1	1	3	5	5	4	5	3	6	6	4	1	7	6	5	5	5	3	2
897	1	2	1	1	1	環境に配慮している	3	3	1	3	1	2	1	1	2	1	1	2	1	1	5	4	5	5	4	4	5	4	4	4	5	5	4	5	4	4	1
898	1	2	0	2	2	r	2	1	1	2	0	0	2	2	1	2	2	2	1	2	3	2	5	3	5	5	4	5	3	3	3	3	4	3	4	2	2
899	1	2	0	1	3	健康	3	3	1	2	0	0	2	1	2	1	2	1	1	1	4	5	4	4	4	3	4	3	4	4	3	4	4	4	3	4	1
900	1	2	1	1	1	大豆ミート	1	3	1	2	0	0	2	1	2	2	1	1	1	1	4	2	6	5	5	5	6	5	5	2	7	5	5	7	5	4	1
901	1	2	1	1	4	何も思い浮かばない	3	3	1	1	1	2	3	3	3	3	3	3	3	3	4	4	4	4	4	4	4	4	4	4	4	4	4	4	4	4	1
902	1	2	1	1	3	大豆	1	3	1	2	0	0	2	1	2	2	2	1	1	1	2	5	6	5	4	6	6	4	2	3	3	4	3	3	7	2	2
903	1	2	1	1	3	豆	3	3	1	3	1	1	3	3	3	3	3	3	3	3	4	5	5	1	4	4	4	4	4	4	4	4	4	4	3	4	1
904	1	2	0	1	3	豆腐？	3	3	1	3	1	2	1	1	2	2	1	2	1	1	4	5	5	4	4	4	5	5	5	4	5	4	3	4	3	3	1
905	1	2	0	1	3	大豆	1	3	1	3	1	1	1	1	2	2	1	2	2	1	3	5	3	2	3	4	6	4	5	4	6	6	5	5	4	4	1
906	1	2	1	1	3	大豆ミート	1	3	1	2	0	0	3	1	2	2	1	1	3	1	4	2	6	4	2	6	2	6	5	4	7	7	6	7	5	5	3
907	1	2	0	2	1	大豆ミート	1	3	1	1	1	2	3	1	3	2	3	1	3	1	4	5	4	4	4	5	5	3	3	4	5	5	4	5	4	5	1
908	1	2	1	5	1	動物を搾取しない	1	1	1	2	0	0	2	3	1	2	3	1	3	1	3	3	3	4	3	3	2	2	2	2	7	7	7	7	7	7	1
909	1	2	0	1	3	大豆とか	3	3	1	3	1	2	1	1	2	1	2	2	1	1	2	2	5	3	4	1	7	6	5	2	5	2	2	3	2	2	1
910	1	2	1	1	3	大豆で作られたハンバーグ？のようなもの	1	3	1	2	0	0	1	1	2	1	1	3	1	1	2	5	5	5	5	3	6	3	3	3	5	5	4	5	5	3	2
911	1	2	0	1	4	羊肉、蛙肉	1	2	1	3	1	1	3	3	2	3	1	3	1	3	5	3	6	3	3	5	2	1	6	1	5	5	3	3	6	6	1
912	1	2	0	1	4	羊	1	2	1	2	0	0	1	1	1	1	1	1	1	1	4	4	5	3	5	4	5	4	6	4	6	6	6	6	4	4	1
913	1	2	1	2	4	なし	3	3	1	3	1	2	3	3	3	3	3	3	3	3	2	4	7	4	7	5	5	4	3	5	3	4	4	4	5	4	1
914	1	2	1	1	3	大豆	1	3	1	3	1	2	1	1	2	1	1	1	2	1	3	4	6	3	5	3	7	5	2	2	3	3	3	3	3	5	3
915	1	2	1	1	2	肉とほぼ変わらない味で、栄養素を補える。	1	3	1	2	0	0	1	1	2	1	1	1	1	2	3	3	3	5	2	5	3	4	6	6	4	4	3	4	3	4	1
916	1	2	0	1	2	コオロギ肉	3	1	1	1	1	3	1	1	2	2	1	1	2	1	3	2	2	5	1	5	5	2	4	3	3	5	6	4	4	3	1
917	1	2	0	1	4	特になし	3	3	1	2	0	0	3	3	3	3	3	3	3	3	3	3	2	2	3	3	2	3	2	2	3	2	2	3	2	3	1
918	1	2	0	5	4	特になし	3	3	1	1	1	3	1	3	3	3	3	3	3	3	4	4	4	4	4	4	4	4	4	4	4	4	4	4	4	4	1
919	1	2	0	1	4	よく分からない	3	3	1	2	0	0	1	1	2	3	1	3	1	1	1	5	6	1	6	2	7	3	5	1	1	1	1	2	3	1	3
920	1	2	1	1	4	大豆ミート	3	3	1	1	1	3	2	2	2	1	1	1	1	1	2	2	4	2	4	6	6	6	2	2	6	4	4	4	2	2	1
921	1	2	1	1	4	大豆	1	3	1	2	0	0	1	1	2	2	2	1	1	1	2	5	5	5	6	6	5	7	2	2	5	2	4	4	4	2	1
922	1	2	1	1	4	肉っぽいもの	3	3	1	3	1	2	1	1	2	2	1	1	3	1	4	3	3	6	7	5	3	1	5	1	7	7	7	7	7	7	1
923	1	2	0	1	1	大豆で作った肉風味の素材	1	1	1	1	1	2	1	1	2	2	1	2	2	1	4	5	5	5	2	4	4	4	5	5	4	4	4	5	5	4	2
924	1	2	1	1	4	怖い	3	3	1	1	1	3	3	3	3	3	3	3	3	3	1	1	1	2	4	1	6	6	2	1	7	7	4	7	7	7	1
925	1	2	0	1	4	気持ち悪く感じる	1	3	1	1	1	1	3	1	2	3	2	3	3	1	1	4	2	5	7	5	5	5	7	4	4	5	4	6	6	6	1
926	1	2	0	1	4	ない	1	1	1	2	0	0	1	1	2	2	2	1	2	2	3	3	3	2	4	4	4	3	3	3	3	2	3	3	4	3	2
927	1	2	1	1	4	大豆ミート？	3	3	1	2	0	0	2	1	2	1	1	1	1	1	2	4	5	2	5	2	6	2	2	2	6	5	5	6	5	5	2
928	1	2	1	1	1	大豆	1	3	1	2	0	0	2	1	2	2	2	1	1	1	5	2	2	3	4	2	3	2	5	2	5	2	3	6	6	6	1
929	1	2	1	1	3	大豆肉	1	1	1	3	1	1	1	2	2	1	2	2	1	1	5	4	6	5	1	7	3	5	7	6	7	7	7	7	7	6	3
930	1	2	1	2	3	使わない部分の肉	1	3	1	2	0	0	1	1	1	1	1	2	1	1	1	1	7	1	4	1	7	2	1	4	5	3	4	5	4	1	3
931	1	2	1	1	1	大豆	3	3	1	2	0	0	2	1	2	1	2	1	1	1	4	4	4	2	7	5	2	5	5	5	4	4	4	4	4	4	1
932	1	2	1	1	1	大豆ミート	1	2	1	2	0	0	1	2	1	2	1	1	1	2	3	4	4	4	5	4	4	3	2	3	4	5	6	5	4	5	2
933	1	2	0	1	3	らちらたりたらたらたらたらたらたらたらたらちりちらたらたらたらたらたらたらたらならならたらならならならならたら	3	1	1	3	1	2	2	1	2	1	1	1	1	1	4	5	4	4	5	4	4	5	4	4	4	5	4	5	4	4	1
934	1	2	0	1	3	ヘルシー	1	3	1	2	0	0	1	1	2	1	1	1	1	1	3	2	6	5	2	5	3	3	5	4	4	4	4	4	4	4	2
935	1	2	1	1	1	大豆ミート	3	3	1	3	1	2	1	1	2	1	1	1	1	1	5	4	7	1	5	4	7	5	5	2	5	4	4	4	3	4	1
936	1	2	1	1	1	大豆	1	3	1	1	1	3	1	1	2	1	1	2	2	2	6	3	6	7	2	6	5	7	6	7	7	7	7	7	7	7	4
937	1	2	1	1	4	コオロギ 昆虫 見た目	1	3	1	2	0	0	3	1	2	1	1	2	1	1	2	5	3	3	5	2	6	5	3	2	5	2	3	5	2	3	3
938	1	2	1	1	3	肉みたいな食べ物	1	3	1	2	0	0	1	1	2	2	1	3	1	1	5	1	3	5	4	4	1	1	7	4	5	1	1	1	1	2	1
939	1	2	0	1	3	肉の代わり	3	3	1	1	1	2	2	1	2	1	1	2	1	1	4	5	5	3	5	5	5	4	4	3	5	4	3	4	5	5	1
940	1	2	0	1	4	特に思いつかないから食べたことあるかがわからない	1	3	1	3	1	1	1	1	2	3	1	3	1	3	2	3	6	5	5	2	5	5	3	3	6	4	3	5	4	5	1
941	1	2	0	4	3	なし	3	3	1	2	0	0	2	2	2	2	1	1	1	2	4	3	4	4	3	5	5	5	6	4	4	4	3	4	4	4	1
942	1	2	1	1	4	特になし	3	3	1	1	1	2	1	1	1	1	2	2	1	1	2	4	5	3	4	2	7	5	3	4	4	4	4	4	3	4	2
943	1	2	1	1	4	大豆ミート	3	3	1	1	1	3	1	1	2	1	2	2	1	2	1	5	5	3	6	2	5	2	2	1	5	3	2	2	2	3	1
944	1	2	0	1	4	特になし	3	3	1	2	0	0	3	3	3	3	3	3	3	3	4	4	4	4	4	4	4	4	4	4	4	4	4	4	4	4	1
945	1	2	1	1	4	大豆	1	3	1	2	0	0	1	1	1	2	2	3	2	1	5	4	7	3	7	5	6	6	4	1	6	5	6	5	3	4	2
946	1	2	0	2	1	特になし	2	2	1	2	0	0	1	2	1	3	1	2	1	2	4	4	3	4	3	3	3	4	3	2	3	2	3	4	3	4	2
947	1	2	1	1	3	ミミズ	1	2	1	3	1	2	1	1	2	2	2	2	1	1	1	2	1	1	1	2	1	3	1	1	5	5	5	5	5	5	3
948	1	2	0	5	4	ハゲタカ	3	2	1	2	0	0	2	3	2	3	3	3	3	3	5	4	6	3	2	3	3	3	3	4	4	3	4	4	4	4	4
949	1	2	0	1	3	コオロギ	2	1	1	2	0	0	1	1	1	1	2	2	1	1	1	6	6	1	6	1	6	6	3	2	1	1	1	1	1	1	3
950	1	2	0	1	3	大豆で作った肉	1	3	1	2	0	0	1	1	2	1	1	3	1	1	4	3	5	2	5	2	5	4	3	3	5	4	3	4	3	3	1
951	1	2	1	1	4	特になし	3	3	1	2	0	0	1	1	2	2	1	2	2	1	3	4	5	3	4	3	5	4	4	3	5	5	4	4	4	4	1
952	1	2	1	1	2	大豆ミート	1	3	1	1	1	1	1	1	2	1	1	2	1	2	3	5	6	3	5	3	6	4	5	2	5	5	5	5	3	3	3
953	1	2	1	1	3	ヘルシー	1	1	1	3	1	1	1	1	2	1	1	1	1	1	2	5	6	2	4	1	6	4	2	2	4	3	1	2	2	2	3
954	1	2	1	1	4	分からない	3	3	1	3	1	1	3	3	3	3	3	3	3	3	2	5	5	2	6	2	6	3	1	1	5	3	4	3	4	2	1
955	1	2	1	1	2	特にない	3	3	1	1	1	2	1	2	1	2	2	1	2	3	4	5	4	2	4	2	4	4	3	4	3	3	3	3	5	3	3
956	1	2	0	1	1	大豆肉	1	3	1	3	1	2	1	1	2	1	1	2	1	1	2	4	5	5	3	6	1	3	7	5	5	1	2	5	3	3	1
957	1	2	0	1	3	加工された肉	3	3	1	3	1	2	1	1	2	1	1	1	1	1	4	3	5	6	2	6	3	4	7	5	6	5	4	5	3	4	2
958	1	2	0	1	4	大豆ミート	1	2	1	2	0	0	1	1	2	2	1	2	2	1	1	1	1	6	1	6	1	1	6	4	6	6	5	6	6	7	3
959	1	2	0	1	4	植物性	3	3	1	2	0	0	1	1	2	2	2	2	1	1	7	1	7	7	1	7	1	7	7	7	7	1	1	7	7	1	3
960	1	2	0	1	3	大豆肉	1	3	1	2	0	0	1	1	1	1	3	3	2	3	2	6	7	4	6	1	7	7	6	1	2	2	1	1	1	1	1
961	1	2	1	1	3	分からない	3	3	1	3	1	2	1	1	2	2	2	1	1	1	2	4	5	4	4	3	4	3	4	4	5	4	3	4	4	4	1
962	1	2	0	1	1	大豆ミート	1	3	1	2	0	0	2	1	2	2	1	1	1	1	3	5	4	5	3	4	4	4	5	5	5	4	5	5	4	5	2
963	1	2	1	1	4	ない	3	3	1	3	1	3	3	3	3	3	3	3	3	3	7	7	7	7	7	5	6	2	6	4	5	1	4	6	5	5	2
964	1	2	0	1	3	危なそう	3	3	1	2	0	0	1	1	2	2	1	1	2	1	2	3	3	3	4	3	4	4	5	3	4	4	4	4	4	3	1
965	1	2	1	4	4	植物	3	3	1	2	0	0	1	1	2	1	1	3	3	3	3	6	7	3	5	4	7	6	1	1	5	4	3	4	4	4	1
966	1	2	1	1	3	フェイクフード、大豆	1	3	1	1	1	2	1	1	1	1	1	2	2	2	2	3	7	1	1	1	7	6	1	1	5	2	2	4	2	2	3
967	1	2	0	3	2	大豆	2	2	1	2	0	0	2	1	2	1	1	1	1	2	4	5	5	2	3	5	6	3	6	5	5	6	4	3	4	4	2
968	1	2	1	1	3	おいしくない	1	1	1	1	1	2	1	1	2	3	1	2	2	1	3	7	7	3	5	5	6	4	6	1	1	1	1	1	1	2	2
969	1	2	1	1	4	不味そう	3	3	1	1	1	1	3	3	3	3	3	3	3	3	4	4	4	3	4	4	4	4	4	4	4	3	4	4	4	4	1
970	1	2	0	1	4	特にない	1	3	1	2	0	0	1	2	2	2	1	2	1	1	3	4	5	5	5	5	5	2	6	5	5	5	5	5	5	5	2
971	1	2	1	1	3	大豆	1	3	1	2	0	0	1	1	2	1	1	1	1	1	3	3	5	5	3	1	5	3	5	3	5	3	3	5	5	3	2
972	1	2	0	1	4	美味しくない	3	3	1	2	0	0	1	1	2	1	2	2	1	1	1	3	1	7	1	2	5	1	2	2	1	1	1	7	1	1	2
973	1	2	0	1	1	大豆	1	1	1	2	0	0	1	1	2	2	2	2	1	1	3	4	6	4	1	3	1	5	4	6	2	1	2	3	6	1	3
974	1	2	0	1	4	おいしくない	1	3	1	1	1	3	3	3	3	3	3	3	3	3	2	2	4	4	2	4	2	5	2	2	7	7	6	6	2	4	4
975	1	2	0	1	3	肉	3	3	1	1	1	2	1	3	3	3	3	3	3	3	4	4	4	4	4	4	4	4	4	4	4	4	4	4	4	4	2
976	1	2	1	1	3	なし	3	3	1	1	1	3	3	3	3	3	3	3	3	3	6	6	6	6	6	6	6	6	6	6	6	6	6	6	6	6	1
977	1	2	0	1	4	豆腐	3	3	1	2	0	0	3	3	3	3	3	3	3	3	5	3	4	5	6	6	7	4	5	1	4	4	6	4	4	2	4
978	1	2	0	1	2	ない	3	3	1	1	1	2	2	2	2	2	2	2	2	2	4	4	4	4	4	4	4	4	4	4	4	4	4	4	4	4	2
979	1	2	0	1	1	大豆	1	3	1	3	1	1	1	2	1	1	2	2	1	1	3	7	1	1	4	2	7	4	1	1	4	4	4	4	4	4	1
980	1	2	1	1	1	大豆	1	2	1	3	1	2	1	1	2	1	3	3	1	1	6	4	5	6	5	6	5	6	6	6	7	5	5	6	5	2	1
981	1	2	0	1	4	大豆料理	1	2	1	1	1	2	1	1	2	3	2	2	1	3	1	6	6	2	4	3	6	6	4	3	4	3	2	3	3	3	2
982	1	2	0	1	3	大豆ミート	1	3	1	2	0	0	2	1	2	1	2	1	1	1	3	3	5	3	6	3	6	3	5	2	2	2	2	5	2	2	1
983	1	2	0	2	2	いい肉	2	2	1	1	1	1	1	1	1	1	1	1	1	1	4	4	4	4	4	4	4	4	4	4	4	4	4	4	4	4	3
984	1	2	0	1	4	おいしくない	3	3	1	3	1	2	1	1	2	2	2	2	1	1	2	4	5	5	4	6	5	4	6	4	5	3	5	5	4	4	1
985	1	2	1	3	4	ない	2	3	1	2	0	0	2	3	2	2	2	2	3	3	6	5	1	3	2	2	4	3	5	6	5	5	3	5	4	4	1
986	1	2	1	1	4	豆の肉	1	3	1	2	0	0	3	3	2	3	1	3	1	3	2	2	2	5	2	3	3	1	6	5	7	6	5	5	4	4	1
987	1	2	1	2	1	ヘルシー	1	3	1	3	1	2	2	1	2	2	2	1	1	1	2	2	2	2	5	3	1	1	7	2	5	2	2	1	2	5	2
988	1	2	1	1	3	ハラルフード	1	3	1	2	0	0	2	1	2	1	1	1	1	1	3	3	3	6	4	4	5	3	5	2	3	5	2	5	2	3	3
989	1	2	1	1	1	大豆ミート	1	3	1	3	1	2	2	2	1	3	3	3	3	2	4	4	7	5	3	4	4	4	5	5	6	5	3	4	5	5	1
990	1	2	1	3	3	ツナ	3	2	1	3	1	2	2	1	2	2	3	1	1	3	5	5	4	5	4	4	5	5	3	4	4	4	4	3	4	4	1
991	1	2	0	1	3	大豆ミート	1	3	1	1	1	2	1	1	2	1	1	2	2	1	4	4	4	6	4	4	5	3	5	4	5	4	4	3	3	4	1
992	1	2	0	1	4	良くない	3	1	1	1	1	2	3	3	3	3	3	3	3	3	5	4	4	4	5	4	5	5	5	3	4	4	4	4	4	4	1
993	1	2	0	1	3	コストの高さ、知名度、安全性	1	3	1	2	0	0	1	1	2	1	1	1	1	2	4	2	4	5	4	4	4	4	6	4	5	5	5	5	4	4	1
994	1	2	0	1	3	ない	3	3	1	3	1	3	1	2	1	1	1	1	1	1	3	3	4	4	3	3	4	4	4	3	4	6	2	2	4	4	4
995	1	2	0	1	1	大豆	1	3	1	2	0	0	2	1	2	1	2	1	1	2	3	2	3	4	4	4	3	3	5	4	5	3	3	5	4	3	2
996	1	2	0	1	3	大豆	3	3	1	2	0	0	1	1	2	1	1	1	1	1	4	5	7	5	4	1	6	5	2	3	4	2	4	4	2	4	3
997	1	2	0	1	4	浮ばない	3	3	1	2	0	0	1	2	2	1	1	2	1	1	1	1	1	6	1	6	1	1	7	1	2	2	2	2	2	2	1
998	1	2	0	1	3	パサパサそうな感じ	3	3	1	2	0	0	1	1	2	1	2	1	1	2	4	3	7	1	3	2	2	2	5	2	5	3	5	5	5	5	1
999	1	2	0	1	4	特に無し。	3	3	1	2	0	0	2	2	3	2	2	2	1	2	6	5	4	6	5	4	5	3	4	5	4	5	4	5	4	3	1
1000	1	2	0	1	4	何も思い浮かばない。	1	3	1	3	1	2	3	3	3	3	3	3	3	3	1	4	5	4	4	6	6	3	5	5	4	4	4	4	4	3	1

## Sheet: China_data
ID	information	BLOCK	gender	dietary_preference	experience	association	knowledge1	knowledge2	explanation1	test1	explanation2	test2	q1	q2	q3	q4	q5	q6	q7	q8	neophobia1	neophobia2	neophobia3	neophobia4	neophobia5	neophobia6	neophobia7	neophobia8	neophobia9	neophobia10	gcv1	gcv2	gcv3	gcv4	gcv5	gcv6	income
1	0	1	0	1	1	植物肉	1	1	0	0	0	0	1	2	2	2	2	2	2	1	6	5	6	7	3	6	4	5	4	6	7	6	6	5	6	7	2
2	0	1	1	2	3	直接吃肉不好吗？	1	1	0	0	0	0	1	2	1	2	2	1	2	2	4	7	4	3	7	5	6	7	3	4	7	6	2	7	4	4	2
3	0	1	1	2	1	魔芋	1	1	0	0	0	0	1	2	2	2	2	2	2	1	5	7	7	6	2	6	5	2	1	6	6	5	6	7	6	7	1
4	0	1	1	1	2	科技	1	3	0	0	0	0	1	2	2	2	1	2	2	1	4	5	7	6	3	5	4	2	6	7	5	5	6	4	5	6	3
5	0	1	1	1	1	好吃，便宜口感好，有饱腹感	1	1	0	0	0	0	1	2	2	2	2	2	2	1	6	3	2	6	1	6	2	5	1	6	6	6	7	6	7	7	4
6	0	1	1	1	3	营养，补品	3	1	0	0	0	0	1	2	2	2	2	2	1	1	5	4	4	6	3	5	4	4	5	6	5	4	6	4	5	5	1
7	0	1	1	1	1	用蔬菜制作的但是看上去和吃起来很像肉的菜	3	1	0	0	0	0	1	1	3	1	1	2	2	1	6	5	6	6	3	5	3	4	6	5	4	3	3	5	4	5	2
8	0	1	0	1	1	豆制品	1	1	0	0	0	0	1	3	2	3	3	2	3	1	4	5	7	4	5	6	4	3	7	5	4	3	5	6	7	5	3
9	0	1	1	1	1	好吃极了	1	3	0	0	0	0	1	2	3	1	2	3	1	2	2	3	4	5	7	6	5	4	5	3	4	5	6	7	6	3	2
10	0	1	1	1	3	素肉	1	3	0	0	0	0	1	2	2	2	1	2	1	1	5	6	7	6	3	2	4	3	1	6	5	2	6	1	4	5	3
11	0	1	1	1	1	豆制品制作的仿制肉类食物	1	3	0	0	0	0	1	2	3	1	2	2	2	1	6	5	5	6	3	5	4	5	3	6	5	5	5	6	5	5	2
12	0	1	1	1	3	蘑菇	1	3	0	0	0	0	1	2	2	2	1	2	1	1	4	4	5	6	2	6	4	4	3	7	7	6	6	7	6	7	2
13	0	1	1	1	3	没事没事	2	1	0	0	0	0	3	1	2	1	1	2	1	1	4	5	3	6	6	5	4	3	2	5	5	4	3	5	6	4	2
14	0	1	0	1	3	大豆蛋白	2	3	0	0	0	0	1	2	1	1	2	2	2	1	5	4	6	5	3	6	3	4	4	4	6	6	4	4	4	3	2
15	0	1	1	1	2	蟹肉棒 ，素毛肚	1	2	0	0	0	0	1	2	2	2	2	2	2	2	5	4	6	7	4	5	4	5	3	6	6	5	6	7	6	5	2
16	0	1	1	1	1	人造火腿	1	1	0	0	0	0	2	2	2	1	1	2	2	1	7	4	2	6	2	6	1	4	4	6	4	5	4	6	3	4	2
17	0	1	1	2	3	素鸡	1	3	0	0	0	0	2	3	2	1	2	3	1	1	5	4	4	5	3	5	4	5	2	5	5	5	6	7	5	6	2
18	0	1	1	1	1	未来食品	1	1	0	0	0	0	2	2	2	1	1	2	2	1	7	4	7	7	1	7	2	5	3	7	7	7	7	7	7	7	2
19	0	1	1	1	2	无可替代	2	3	0	0	0	0	2	1	1	2	2	1	2	1	5	4	6	5	4	6	4	6	4	5	6	5	3	6	4	5	2
20	0	1	1	1	1	植物肉	1	1	0	0	0	0	1	2	1	2	1	2	2	1	4	5	7	5	2	5	3	2	5	6	4	4	5	6	6	4	2
21	0	1	1	1	1	加工食品	3	3	0	0	0	0	1	2	1	2	1	1	2	2	5	3	4	6	2	6	2	2	4	6	6	6	6	6	7	7	2
22	0	1	0	2	3	营养	3	3	0	0	0	0	1	3	3	2	3	2	2	1	3	4	5	6	3	6	4	2	5	6	4	5	6	5	6	7	4
23	0	1	1	1	3	素肉	1	3	0	0	0	0	1	2	1	2	1	1	2	2	6	3	4	7	2	3	2	2	6	7	6	5	4	5	5	6	4
24	0	1	1	1	1	很好吃	1	3	0	0	0	0	1	2	1	2	2	1	2	2	5	4	5	6	3	5	3	5	4	5	5	6	5	5	4	5	3
25	0	1	1	1	1	合成肉 不太健康	1	3	0	0	0	0	1	2	2	2	2	2	2	1	4	6	6	7	3	5	4	5	1	6	4	4	5	5	5	4	2
26	0	1	1	2	1	丸子	1	3	0	0	0	0	1	2	2	2	2	1	2	1	6	5	7	5	2	6	5	5	2	7	7	4	5	3	5	3	2
27	0	1	1	1	2	午餐肉	1	3	0	0	0	0	1	2	1	2	2	2	2	2	6	5	6	5	3	6	2	5	6	7	3	2	4	3	4	2	3
28	0	1	1	1	3	香肠	3	3	0	0	0	0	1	2	2	2	1	2	2	1	6	4	7	3	2	5	2	5	1	4	6	5	7	3	4	5	2
29	0	1	1	1	3	猪肉	1	1	0	0	0	0	3	3	2	3	3	3	3	3	4	5	4	5	3	5	4	3	5	5	6	4	5	6	5	4	1
30	0	1	0	1	2	蛋白粉	1	3	0	0	0	0	1	2	2	2	2	2	2	1	6	4	7	7	3	6	4	7	2	6	5	4	6	7	4	4	3
31	0	1	1	1	3	素肉	3	1	0	0	0	0	2	1	2	1	2	1	2	1	3	7	7	6	1	5	2	4	2	6	6	5	5	7	3	6	2
32	0	1	0	1	1	prefect	1	3	0	0	0	0	1	1	1	1	1	2	1	1	5	4	5	6	3	5	3	4	4	6	3	4	4	5	5	6	2
33	0	1	1	4	3	牛奶	1	3	0	0	0	0	1	2	2	2	1	2	2	1	5	3	7	6	3	6	5	6	5	4	5	7	4	5	6	7	2
34	0	1	1	1	1	美味的	1	1	0	0	0	0	1	1	2	2	3	2	1	1	5	5	7	5	1	6	2	3	5	7	6	7	7	5	6	6	2
35	0	1	1	1	1	减脂餐	1	3	0	0	0	0	2	2	2	2	1	2	2	2	6	4	7	6	3	6	3	5	6	7	6	6	7	7	6	6	2
36	0	1	0	1	1	不好吃	3	2	0	0	0	0	2	1	3	2	1	2	2	2	4	7	2	5	7	4	6	3	2	5	7	3	4	2	6	5	2
37	0	1	0	1	4	健康	1	1	0	0	0	0	1	2	1	2	3	1	2	2	4	2	7	7	4	6	4	6	4	6	4	4	4	6	6	4	2
38	0	1	0	4	3	昂贵	1	3	0	0	0	0	1	2	2	2	2	1	2	1	5	4	5	5	1	5	4	6	2	7	5	4	7	5	6	6	2
39	0	1	0	1	1	豆类，蛋白粉	1	3	0	0	0	0	1	2	1	1	2	2	2	1	4	6	6	4	5	6	4	2	5	5	4	5	6	5	4	3	2
40	0	1	1	1	3	嗯，非肉类	1	2	0	0	0	0	1	2	2	2	3	3	3	3	5	4	6	6	4	6	3	6	5	7	6	6	7	6	7	5	2
41	0	1	0	1	3	植物蛋白、合成肉	1	3	0	0	0	0	1	2	2	2	2	2	1	1	5	4	7	5	4	6	4	2	5	6	5	6	4	7	5	4	2
42	0	1	1	1	1	科技与狠活	1	1	0	0	0	0	1	2	2	2	1	1	2	1	3	6	6	3	6	5	4	5	3	3	4	3	3	5	4	5	2
43	0	1	0	1	1	很好吃我喜欢吃	1	2	0	0	0	0	1	2	2	1	2	1	1	2	4	5	6	6	5	4	3	2	3	4	5	6	7	6	5	4	3
44	0	1	0	1	2	鸡胸肉，用那些豆子替代，	2	1	0	0	0	0	1	1	2	2	1	1	1	2	4	5	3	4	3	3	2	3	2	3	3	1	4	2	4	1	2
45	0	1	1	1	1	光合力量	1	3	0	0	0	0	1	1	1	2	2	1	2	1	5	2	4	5	2	6	2	4	5	5	4	4	5	4	4	4	3
46	0	1	1	1	2	豆腐，不吃肉	1	2	0	0	0	0	1	1	1	2	2	1	1	1	6	3	4	7	6	5	4	2	5	4	6	3	4	5	6	5	2
47	0	1	1	1	2	干豆	1	2	0	0	0	0	1	2	1	2	2	1	2	2	3	6	7	5	4	6	2	7	1	5	5	7	6	7	4	6	2
48	0	1	1	1	3	可以替代由肉类食物提供的蛋白质等的食物	1	3	0	0	0	0	1	2	2	2	1	2	2	1	7	3	6	7	1	7	3	1	7	7	7	7	7	7	7	7	2
49	0	1	1	1	4	人造肉	1	3	0	0	0	0	1	2	2	3	1	3	3	1	4	6	5	6	3	5	3	2	5	6	6	7	4	6	7	7	2
50	0	1	1	1	3	会不会有像吃真肉一样	1	3	0	0	0	0	1	1	2	2	2	2	1	2	6	2	5	4	3	5	6	3	2	5	5	6	7	6	5	6	2
51	0	1	1	1	1	环保	1	1	0	0	0	0	2	1	2	1	2	1	1	1	5	3	3	3	4	5	3	3	5	5	6	6	7	6	6	6	2
52	0	1	1	1	1	健康减肥	1	3	0	0	0	0	1	2	2	2	1	2	2	1	3	5	6	6	2	2	6	4	2	4	6	6	6	6	6	6	2
53	0	1	1	1	3	有肉味的素食。	1	3	0	0	0	0	1	2	1	1	3	2	2	1	6	3	3	6	2	5	3	3	5	7	5	5	5	6	5	5	3
54	0	1	1	1	3	大豆制品	3	3	0	0	0	0	1	3	2	3	1	3	2	1	6	3	3	7	2	6	1	5	3	6	4	4	5	7	5	5	3
55	0	1	0	4	2	素牛肉	1	3	0	0	0	0	1	2	1	2	1	2	2	2	5	4	5	4	5	4	5	4	4	4	5	5	4	5	4	5	2
56	0	1	0	1	1	蛋白质高	1	3	0	0	0	0	1	1	1	1	2	2	1	1	6	4	6	7	2	6	4	2	5	7	6	7	5	6	4	6	2
57	0	1	0	1	1	我记得我看到过外国一项关于肉类替代品的研究	1	1	0	0	0	0	1	2	1	2	3	1	2	2	3	5	5	4	5	6	4	3	4	4	3	3	4	3	4	3	3
58	0	1	1	1	4	人工肉，或者豆制品成的肉	1	3	0	0	0	0	1	2	1	2	2	1	2	1	5	6	6	5	3	6	5	4	3	4	4	4	4	6	5	5	2
59	0	1	0	4	1	好吃	1	3	0	0	0	0	1	2	1	2	2	1	2	2	5	4	6	6	6	5	3	4	4	4	5	4	5	4	5	5	2
60	0	1	1	1	1	植物肉	1	3	0	0	0	0	1	1	2	2	2	2	1	1	4	6	7	4	2	6	4	2	2	6	5	4	6	5	6	6	4
61	0	1	0	1	3	豆干	1	1	0	0	0	0	1	1	1	2	2	2	1	1	5	4	5	6	3	6	4	3	5	6	4	3	3	5	5	4	2
62	0	1	1	1	2	是一种有肉味道但不是肉	1	1	0	0	0	0	1	2	1	2	2	1	2	2	5	3	5	7	1	6	2	3	5	6	3	3	2	2	3	2	3
63	0	1	1	1	1	素食做成的，肉味	1	3	0	0	0	0	1	2	2	2	2	2	1	1	4	5	6	4	2	4	1	4	3	5	6	4	4	5	4	5	2
64	0	1	1	1	1	大豆蛋白	1	2	0	0	0	0	1	2	2	2	2	2	1	1	6	5	5	4	3	4	5	2	4	5	7	5	5	4	5	5	2
65	0	1	1	1	1	植物肉	1	1	0	0	0	0	1	2	1	1	1	2	2	1	4	5	6	5	2	5	4	3	3	4	3	2	3	2	4	3	2
66	0	1	0	1	2	假肉	1	1	0	0	0	0	1	2	1	2	3	1	2	2	3	6	7	5	3	4	2	3	2	5	5	6	5	4	6	4	3
67	0	1	0	1	2	口感不好，质量不行	1	3	0	0	0	0	1	2	3	2	1	2	2	3	4	5	6	4	7	6	6	4	3	5	6	7	6	4	6	7	2
68	0	1	1	1	3	植物肉	3	1	0	0	0	0	1	2	2	1	1	1	2	1	5	5	4	6	3	5	4	2	4	5	6	5	5	5	6	6	2
69	0	1	1	1	3	豆制品	3	2	0	0	0	0	1	2	1	2	1	1	2	2	5	3	4	5	2	5	1	5	4	6	7	6	4	5	4	5	2
70	0	1	1	1	3	新型健康	1	1	0	0	0	0	1	2	1	2	2	1	2	2	5	3	6	6	3	6	3	6	3	7	6	6	6	6	5	7	2
71	0	1	0	1	1	人造肉	1	1	0	0	0	0	1	2	2	1	1	2	1	1	5	4	2	6	3	5	3	4	1	5	4	3	5	3	4	4	2
72	0	1	1	1	1	手撕素肉	1	3	0	0	0	0	1	2	1	2	2	1	2	1	6	5	7	6	4	7	6	5	6	7	6	5	7	6	5	6	2
73	0	1	0	2	2	腻	2	3	0	0	0	0	2	2	1	1	2	1	2	1	6	2	7	5	6	4	5	6	1	4	6	5	4	6	3	4	2
74	0	1	0	1	2	素肉	1	3	0	0	0	0	1	2	1	2	1	2	2	1	6	5	6	5	4	6	5	4	5	4	4	5	6	5	4	3	2
75	0	1	1	1	1	素肉	1	3	0	0	0	0	1	2	2	2	1	1	1	1	4	6	1	4	3	5	5	3	2	5	5	5	5	6	6	6	2
76	0	1	1	2	3	植物肉	1	1	0	0	0	0	1	3	2	2	1	2	2	1	4	6	7	5	2	4	3	4	4	6	5	6	6	7	6	7	3
77	0	1	1	1	1	人造肉	1	2	0	0	0	0	1	2	2	2	1	2	1	1	5	4	4	6	3	6	3	4	4	6	6	7	7	6	5	6	2
78	0	1	1	1	3	植物肉	3	3	0	0	0	0	1	1	1	2	1	2	1	1	4	5	6	4	5	4	6	5	3	5	6	5	6	4	6	5	3
79	0	1	1	1	1	素肉，豆干，	1	2	0	0	0	0	1	2	1	1	2	1	2	1	7	3	5	6	4	6	3	4	6	6	6	5	7	6	5	6	3
80	0	1	1	4	1	豆腐	1	2	0	0	0	0	2	1	2	1	2	2	1	1	5	5	3	4	3	6	4	4	3	4	4	5	4	3	5	5	2
81	0	1	0	1	1	蘑菇做的肉类，很像肉	1	3	0	0	0	0	1	2	1	1	2	3	2	1	5	4	5	5	3	5	3	4	5	5	6	5	6	4	4	5	2
82	0	1	1	1	1	面类或豆类产品经过加工制成的商品。	3	3	0	0	0	0	1	2	2	2	1	2	2	1	5	4	4	4	2	7	2	5	5	5	5	5	5	7	6	5	2
83	0	1	1	1	3	人造	1	1	0	0	0	0	1	3	2	3	3	3	3	1	7	3	6	7	1	6	2	4	3	6	5	5	6	4	5	7	4
84	0	1	0	1	1	豆制品	1	3	0	0	0	0	3	2	2	1	1	2	2	1	5	6	7	4	6	4	5	7	3	5	4	5	4	6	4	3	1
85	0	1	0	1	1	大豆，植物蛋白	1	3	0	0	0	0	1	2	1	2	1	2	2	2	7	2	7	7	2	7	3	1	6	5	6	4	4	5	5	4	2
86	0	1	1	1	1	午餐肉	1	3	0	0	0	0	1	2	2	2	1	2	2	1	4	6	7	6	4	2	1	4	5	7	4	6	5	7	4	6	3
87	0	1	0	1	1	豆腐	1	2	0	0	0	0	1	2	2	2	2	1	2	1	6	5	7	3	5	5	6	2	1	5	5	5	6	4	6	5	2
88	0	1	1	1	3	豆干	1	3	0	0	0	0	1	2	2	1	1	2	2	1	4	5	4	5	5	3	4	3	5	5	4	5	5	4	5	5	2
89	0	1	1	1	1	如果没有熟透的话会有一股腥味的味道	1	3	0	0	0	0	1	1	2	2	2	2	1	1	6	5	7	7	2	5	2	5	3	4	4	5	5	6	6	4	3
90	0	1	1	1	1	素牛肉	1	2	0	0	0	0	2	2	1	1	2	2	1	1	7	3	6	6	5	3	6	4	6	5	4	4	5	5	4	6	2
91	0	1	1	1	1	斋烧鹅	1	3	0	0	0	0	1	2	3	2	2	2	2	1	6	4	4	7	2	6	2	7	2	6	4	3	2	5	4	4	4
92	0	1	1	1	3	植物肉饺子	3	3	0	0	0	0	1	2	2	1	1	2	2	1	7	5	4	7	3	7	3	3	5	5	6	5	6	7	5	4	2
93	0	1	1	1	2	不是肉，但是能有肉的质感。	1	3	0	0	0	0	3	2	2	2	2	1	2	1	5	3	6	4	3	5	4	3	4	5	4	5	4	6	4	5	1
94	0	1	0	1	1	一种品尝起来像肉但是并不是肉的食物	1	2	0	0	0	0	2	2	1	1	2	1	2	1	7	5	4	6	5	6	1	1	5	6	4	4	4	6	6	6	2
95	0	1	1	1	3	类似于肉的零食..	1	1	0	0	0	0	1	2	1	2	1	1	2	2	4	6	7	4	5	6	7	4	5	4	4	4	5	7	6	5	2
96	0	1	0	1	3	蘑菇	1	1	0	0	0	0	2	2	1	1	2	2	2	1	7	2	5	7	2	7	2	5	4	6	5	5	4	4	4	5	1
97	0	1	1	1	3	素肉	1	3	0	0	0	0	1	3	2	3	3	3	2	1	4	5	6	5	5	6	5	4	4	5	5	5	4	5	5	4	1
98	0	1	1	1	1	大豆蛋白	1	3	0	0	0	0	1	2	1	2	2	2	1	1	5	3	6	5	2	5	4	3	2	4	4	3	4	2	4	5	2
99	0	1	1	1	1	想到肉类代替品有豆腐	1	3	0	0	0	0	1	2	1	1	3	3	2	1	6	5	1	2	3	5	1	4	3	6	7	6	6	4	5	4	2
100	0	1	1	1	1	味道很像 好吃	1	3	0	0	0	0	1	2	3	3	1	3	2	1	4	5	5	7	3	5	4	4	6	6	5	6	5	7	6	5	1
101	0	1	1	1	3	肉味辣条	3	3	0	0	0	0	1	2	2	2	1	2	2	1	7	1	4	7	1	7	1	4	5	5	3	3	4	5	4	6	2
102	0	1	1	1	3	不健康	3	3	0	0	0	0	1	3	2	2	3	3	1	1	4	7	7	4	3	3	2	1	4	4	4	4	5	5	5	3	1
103	0	1	1	1	2	植物蛋白质	1	3	0	0	0	0	1	2	3	3	3	2	2	1	4	5	7	7	3	5	6	4	1	3	5	4	4	6	6	5	3
104	0	1	1	1	2	大豆素食	1	3	0	0	0	0	1	3	2	3	3	3	3	1	6	5	6	5	4	6	3	4	2	5	5	5	4	4	5	5	3
105	0	1	1	1	3	素	2	3	0	0	0	0	1	1	2	2	1	2	2	1	4	5	3	4	5	5	3	5	5	2	5	6	3	5	6	6	1
106	0	1	1	2	3	健康，保护动物	1	3	0	0	0	0	3	3	1	1	3	2	1	1	4	5	7	5	3	5	4	4	3	4	5	5	5	6	7	5	2
107	0	1	0	2	1	节约资源。环保	1	3	0	0	0	0	1	2	2	1	2	1	2	1	4	6	5	7	3	6	5	7	2	4	5	3	4	7	6	2	2
108	0	1	0	1	1	低脂肪	1	1	0	0	0	0	1	2	1	1	1	2	2	2	5	6	7	5	3	5	3	1	6	6	4	4	3	6	3	3	2
109	0	1	0	1	3	素食主义者	1	3	0	0	0	0	2	1	2	2	2	1	1	2	6	5	6	5	6	4	7	3	7	5	4	6	4	5	4	5	2
110	0	1	1	1	1	素肉，人造肉	1	1	0	0	0	0	1	3	2	2	2	2	2	1	5	4	6	7	3	5	2	3	4	7	5	6	5	6	5	4	2
111	0	1	1	1	1	分子料理	1	3	0	0	0	0	1	3	2	3	2	3	3	1	5	5	6	6	3	6	4	5	3	4	5	4	5	6	5	5	1
112	0	1	1	1	1	素肉	1	3	0	0	0	0	1	2	1	1	2	2	2	1	3	5	4	3	5	4	5	3	4	4	4	3	3	3	2	3	1
113	0	1	0	1	3	替换品	2	1	0	0	0	0	1	3	2	2	3	2	2	3	4	5	6	3	4	5	3	2	3	5	5	6	5	4	7	7	1
114	0	1	1	1	3	口感是肉，但它的制作成分不是肉	1	3	0	0	0	0	1	2	3	2	1	2	2	1	3	6	5	4	3	3	5	4	2	4	5	4	5	5	4	5	2
115	0	1	0	1	3	豆制品	1	3	0	0	0	0	1	3	3	3	3	3	3	3	5	6	6	4	4	5	3	5	5	4	4	5	6	6	5	4	2
116	0	1	1	1	1	豆制品	1	1	0	0	0	0	1	3	3	1	3	3	2	1	4	5	5	4	5	4	5	3	4	4	4	4	4	5	5	5	1
117	0	1	1	1	1	合成肉	3	3	0	0	0	0	1	2	1	1	2	2	1	1	3	7	6	5	2	5	6	7	3	4	7	6	5	6	4	7	2
118	0	1	1	1	3	素肉	1	2	0	0	0	0	1	2	1	2	2	3	2	1	5	6	7	6	3	6	3	4	3	6	5	5	5	5	5	6	2
119	0	1	1	1	1	素牛肉	1	3	0	0	0	0	1	2	2	2	2	1	2	1	4	5	7	5	3	4	5	6	1	5	6	7	6	6	7	5	1
120	0	1	0	1	1	健康的，可替代的	1	1	0	0	0	0	1	1	2	2	2	2	1	1	6	4	4	5	3	6	3	4	6	6	6	5	7	6	6	5	4
121	0	1	1	1	1	美味	1	2	0	0	0	0	1	3	2	2	2	2	1	2	6	4	6	6	3	6	3	6	4	6	6	7	6	6	6	7	2
122	0	1	1	2	3	用其他营养物质合成的肉类	3	1	0	0	0	0	1	2	2	2	1	2	1	1	6	5	7	4	4	6	4	5	4	6	6	7	6	6	6	7	3
123	0	1	1	1	1	素烧鹅	1	1	0	0	0	0	1	2	1	2	3	1	2	2	5	3	3	6	2	6	2	4	5	5	5	5	6	5	5	6	3
124	0	1	1	1	1	豆腐	1	3	0	0	0	0	1	1	2	2	1	2	1	1	6	4	6	6	4	5	4	4	5	6	5	4	4	5	5	5	3
125	0	1	1	2	4	是否健康	3	3	0	0	0	0	1	2	2	2	1	2	2	1	1	6	7	4	4	4	6	7	1	4	4	4	3	5	4	5	2
126	0	1	1	1	1	脂肪少	1	1	0	0	0	0	2	2	2	1	1	2	2	1	6	4	3	5	3	6	4	4	2	5	4	4	5	5	5	4	2
127	0	1	0	1	2	合成肉	2	3	0	0	0	0	1	2	2	2	3	1	2	2	4	2	4	1	6	5	1	4	3	5	1	3	4	2	3	6	2
128	0	1	1	2	1	营养	1	3	0	0	0	0	2	2	2	2	1	2	2	1	6	4	5	5	4	6	5	4	5	4	6	5	6	5	6	5	2
129	0	1	1	3	2	美味佳肴	2	3	0	0	0	0	2	1	2	1	2	1	2	1	5	4	6	7	5	4	3	5	4	6	4	5	6	5	4	5	2
130	0	1	1	1	1	火腿肠	1	1	0	0	0	0	2	2	2	2	1	2	2	1	6	4	5	7	3	6	3	4	6	7	4	5	5	6	6	7	2
131	0	1	1	2	3	素牛肉	1	3	0	0	0	0	1	3	2	3	3	3	2	3	4	5	7	3	4	2	4	6	3	4	4	6	3	7	5	4	4
132	0	1	1	1	3	人工肉	3	2	0	0	0	0	1	2	2	2	1	2	1	1	5	5	6	6	2	6	3	4	5	4	5	4	4	5	5	5	4
133	0	1	0	1	3	非肉质食品代替肉质食品	1	3	0	0	0	0	1	2	2	2	1	2	3	1	6	3	6	7	2	6	3	3	5	6	5	5	4	5	5	5	3
134	0	1	1	4	3	若见花	3	2	0	0	0	0	2	2	1	1	1	2	2	1	4	4	4	4	3	3	4	3	3	4	4	4	4	4	4	4	1
135	0	1	0	2	1	人造肉	1	3	0	0	0	0	1	2	1	1	2	1	2	1	4	7	6	2	7	3	5	1	2	4	3	2	4	5	3	6	3
136	0	1	0	1	2	豆制品	1	3	0	0	0	0	1	2	1	2	3	1	2	1	6	5	7	6	5	6	4	6	5	6	5	6	6	6	6	6	3
137	0	1	1	1	1	豆制品	1	3	0	0	0	0	1	2	1	2	1	2	2	1	4	5	4	6	2	6	3	4	3	5	4	3	4	3	3	3	2
138	0	1	0	1	3	素肉，植物肉	1	3	0	0	0	0	1	2	1	1	3	2	2	1	3	6	4	5	3	5	4	2	5	4	5	4	4	7	4	4	2
139	0	1	0	1	1	自助餐	1	3	0	0	0	0	1	3	2	2	1	3	2	1	3	4	5	6	4	6	3	2	5	6	3	4	4	4	5	2	2
140	0	1	1	1	1	丸子	1	2	0	0	0	0	1	2	3	1	2	3	1	2	4	5	6	5	3	4	2	6	4	6	5	6	5	6	4	5	1
141	0	1	1	1	4	无法理解	1	1	0	0	0	0	1	2	1	2	3	1	2	2	2	5	6	4	5	4	3	6	2	4	5	4	5	7	4	2	4
142	0	1	1	1	1	不健康	1	3	0	0	0	0	1	2	1	2	1	1	2	2	5	4	5	6	2	5	3	4	5	5	5	6	5	4	5	3	2
143	0	1	1	1	3	不健康	3	2	0	0	0	0	1	2	2	2	1	2	2	1	4	5	6	4	3	5	4	3	4	5	6	7	4	6	7	5	1
144	0	1	0	1	3	素肉，豆制品	1	3	0	0	0	0	1	2	1	1	1	2	2	1	5	4	5	5	3	5	4	5	3	4	3	5	4	5	6	4	2
145	0	1	1	1	2	智商税	1	3	0	0	0	0	1	2	1	2	1	3	2	3	6	5	4	6	2	5	3	6	1	6	3	2	1	3	4	3	2
146	0	1	1	1	3	植物肉	1	3	0	0	0	0	1	2	2	1	1	2	2	1	4	3	3	6	3	5	3	3	6	5	3	2	2	4	4	3	3
147	0	1	1	1	2	减肥	3	3	0	0	0	0	1	2	2	1	2	1	2	1	6	4	3	5	4	5	2	4	5	5	4	3	3	4	4	4	2
148	0	1	1	1	1	植物肉，有肉的感觉，味道，但是不是肉	1	3	0	0	0	0	1	2	1	3	1	2	2	1	7	2	6	4	4	3	4	3	6	5	3	3	3	4	2	4	3
149	0	1	0	1	1	无法辨别	1	1	0	0	0	0	1	2	2	2	1	2	2	1	3	5	6	3	4	6	6	4	2	5	5	5	5	6	6	5	3
150	0	1	1	1	1	低脂肪，高蛋白	1	1	0	0	0	0	2	3	2	1	2	3	2	1	5	3	5	5	3	5	3	4	4	5	6	6	5	6	7	5	2
151	0	1	0	1	3	营养	1	1	0	0	0	0	1	2	2	2	1	2	1	1	4	5	6	4	5	3	5	5	3	2	7	6	6	7	7	7	2
152	0	1	1	2	3	好吃	1	3	0	0	0	0	2	1	2	2	1	1	2	2	1	7	7	3	3	4	6	7	3	6	5	7	6	7	6	5	3
153	0	1	1	1	1	肉丸	1	3	0	0	0	0	1	3	2	3	3	3	3	1	5	6	4	5	4	6	4	7	1	3	7	5	6	7	6	7	3
154	0	1	1	1	1	口味跟肉类相似的非肉类食物	1	1	0	0	0	0	1	2	2	1	1	2	1	1	6	5	7	7	3	6	2	3	6	7	6	5	6	6	7	7	4
155	0	1	0	1	1	可以	3	3	0	0	0	0	2	2	2	2	2	2	2	2	3	3	3	3	3	6	6	5	2	7	2	7	5	2	4	5	1
156	0	1	0	1	3	没有听说过该概念	1	3	0	0	0	0	1	2	1	2	1	1	2	2	3	6	4	4	6	6	6	3	6	3	4	3	3	5	4	5	2
157	0	1	1	1	3	味道怎么样	3	3	0	0	0	0	1	2	2	2	3	3	2	1	5	4	6	5	3	6	5	7	2	6	6	5	4	5	6	5	2
158	0	1	1	1	1	豆腐，鸡蛋	3	3	0	0	0	0	1	2	2	1	1	2	2	1	6	5	5	4	4	7	4	5	4	3	5	6	5	6	5	4	2
159	0	1	1	1	2	素肉	1	3	0	0	0	0	1	2	1	2	1	2	2	1	5	6	6	6	3	5	3	6	2	4	4	5	6	4	4	4	2
160	0	1	0	1	1	看着还可以	1	2	0	0	0	0	1	2	1	1	2	1	1	1	6	5	5	6	6	5	5	4	5	4	5	4	5	6	5	4	2
161	0	1	1	1	1	口感可能不好	1	3	0	0	0	0	1	2	2	1	2	2	2	1	5	6	7	5	3	6	5	6	4	6	6	5	6	5	6	5	3
162	0	1	1	1	3	不是肉制作成的，但有肉的味道	1	3	0	0	0	0	1	2	3	2	1	2	2	1	4	5	5	6	3	4	5	2	4	5	4	5	4	5	5	6	3
163	0	1	1	1	2	合成肉	1	1	0	0	0	0	1	2	1	2	1	2	2	2	5	4	7	7	2	5	3	2	4	5	6	7	4	7	3	5	3
164	0	1	1	1	1	植物肉，人工合成肉	1	1	0	0	0	0	1	2	1	2	1	1	2	2	3	4	7	6	1	5	4	3	3	5	5	6	7	5	6	4	3
165	0	1	0	1	3	肉的替代品	1	1	0	0	0	0	1	2	1	2	2	1	2	2	4	3	5	5	5	6	5	5	2	6	7	6	6	2	2	3	2
166	0	1	1	1	1	素牛排	1	3	0	0	0	0	1	2	1	2	1	2	2	3	5	3	6	7	3	6	3	6	3	6	4	5	4	5	6	5	2
167	0	1	1	1	4	虚假的	1	3	0	0	0	0	1	2	2	2	1	1	1	1	5	5	6	7	4	5	3	3	4	6	6	6	5	6	7	5	2
168	0	1	1	1	3	人造肉类	3	1	0	0	0	0	2	2	1	1	2	2	2	1	5	4	6	5	4	5	3	5	4	4	5	5	4	5	4	4	2
169	0	1	0	1	4	合成肉	1	3	0	0	0	0	1	2	1	2	2	1	2	2	1	6	6	4	4	3	5	1	4	6	6	6	5	6	6	5	2
170	0	1	0	1	2	合成肉	1	2	0	0	0	0	1	2	1	2	2	1	2	1	6	3	2	7	2	6	1	1	5	7	5	7	3	7	5	6	2
171	0	1	0	1	3	健康	1	3	0	0	0	0	1	3	2	2	3	2	1	1	7	4	7	6	2	7	2	6	2	7	6	4	5	5	6	6	1
172	0	1	1	1	2	豆类	1	3	0	0	0	0	1	2	1	2	3	1	2	2	6	5	7	4	3	5	4	3	4	5	7	4	5	6	5	6	3
173	0	1	1	1	1	吃过类似豆制品的素肉.这种素肉要味道重才好吃.	1	3	0	0	0	0	1	2	1	3	3	3	3	1	4	5	6	6	3	5	4	4	3	6	6	4	4	4	5	5	3
174	0	1	0	1	3	不可思议	3	3	0	0	0	0	1	2	1	2	2	1	2	1	5	4	5	5	3	5	3	4	4	4	5	4	4	5	4	4	2
175	0	1	1	2	1	植物肉健康美味可口	1	3	0	0	0	0	2	3	2	1	1	2	1	1	5	2	6	7	1	5	2	4	3	7	6	5	7	6	5	6	4
176	0	1	1	1	1	淀粉	1	3	0	0	0	0	1	2	1	2	1	1	2	2	4	5	7	5	2	5	4	4	3	6	4	4	4	5	6	5	2
177	0	1	1	1	3	素肉	1	3	0	0	0	0	1	2	2	2	1	2	2	1	7	2	4	5	1	6	3	4	2	7	4	2	1	4	6	3	2
178	0	1	1	1	1	豆制品制作的类似肉的食物	1	3	0	0	0	0	1	2	1	2	2	1	2	2	4	4	4	6	2	5	4	5	6	6	6	5	6	5	6	5	3
179	0	1	1	1	1	非肉类却肉味食品	1	3	0	0	0	0	1	2	3	1	1	2	2	1	4	5	4	5	3	5	5	2	3	4	4	4	3	5	6	4	2
180	0	1	0	1	2	素毛肚	1	1	0	0	0	0	1	2	2	2	1	2	1	2	6	4	5	6	2	5	1	3	5	6	6	7	4	7	5	5	3
181	0	1	1	1	3	蛋白质补充品	1	3	0	0	0	0	1	2	2	2	2	2	2	1	4	6	5	5	3	4	5	4	3	5	5	5	5	6	6	6	2
182	0	1	0	1	1	可以代替肉类的食品	3	3	0	0	0	0	1	2	2	2	2	1	2	1	5	6	6	6	3	6	4	6	5	4	4	2	6	4	4	4	2
183	0	1	0	2	4	大豆蛋白	1	3	0	0	0	0	1	2	2	1	2	1	1	1	5	4	6	7	5	6	4	5	3	6	6	7	5	6	4	6	2
184	0	1	1	1	3	大豆蛋白	1	1	0	0	0	0	1	3	3	2	2	2	1	2	5	6	4	5	3	5	4	3	4	5	5	5	4	6	7	6	3
185	0	1	0	1	1	素肉，植物基素肉	1	1	0	0	0	0	2	2	1	1	2	2	2	1	4	5	6	5	4	5	4	5	5	6	5	5	6	4	4	5	3
186	0	1	1	1	3	豆类制品	1	3	0	0	0	0	1	2	2	3	1	3	2	1	4	4	4	4	4	4	4	5	4	4	5	5	5	5	6	5	2
187	0	1	1	1	4	人造肉	1	3	0	0	0	0	1	2	1	2	2	3	2	1	6	4	5	6	3	5	3	4	5	6	5	5	4	4	4	4	2
188	0	1	1	2	2	鸡蛋	1	3	0	0	0	0	1	1	2	2	2	2	2	2	5	6	5	6	4	5	4	4	3	5	5	6	4	6	5	5	2
189	0	1	1	1	3	素鸡，植物肉	1	3	0	0	0	0	1	2	1	2	2	1	2	1	5	3	3	5	3	4	4	3	6	5	3	3	3	4	3	2	3
190	0	1	0	1	1	豆制类食品	1	1	0	0	0	0	1	3	2	3	2	3	3	1	7	4	5	7	4	6	2	6	4	6	5	4	4	5	4	3	2
191	0	1	1	2	3	大豆蛋白	3	3	0	0	0	0	1	2	2	1	2	1	1	1	5	4	5	6	4	6	2	4	5	4	6	5	5	6	5	6	3
192	0	1	0	1	4	植物肉	1	1	0	0	0	0	1	2	1	2	2	1	2	2	6	2	4	5	4	5	4	5	2	4	4	5	6	7	5	4	2
193	0	1	1	2	4	豆制品	1	2	0	0	0	0	1	2	2	2	1	2	1	1	5	7	7	5	3	4	4	3	3	5	6	7	6	6	7	6	2
194	0	1	1	1	1	鸡蛋、豆腐	1	3	0	0	0	0	1	2	2	2	2	2	1	1	5	4	5	6	2	4	1	3	4	4	6	5	5	6	6	6	2
195	0	1	1	1	1	素鸡，素牛排	1	2	0	0	0	0	2	3	2	2	2	2	3	1	6	2	5	7	1	6	2	4	6	7	3	2	1	4	3	4	1
196	0	1	1	1	3	素肉	1	3	0	0	0	0	1	2	1	2	2	1	1	1	5	4	1	6	3	5	2	3	6	6	3	3	3	5	5	4	3
197	0	1	0	1	3	植物肉	1	3	0	0	0	0	1	2	1	2	3	1	2	1	5	6	4	5	4	6	4	3	4	5	5	4	5	6	7	4	4
198	0	1	1	1	3	不是肉做的，但有相同的营养价值	3	3	0	0	0	0	3	2	2	2	1	2	2	1	6	5	4	5	3	6	5	5	4	5	5	4	5	5	5	5	2
199	0	1	1	1	1	有肉味儿的食品	1	1	0	0	0	0	2	2	2	1	1	2	2	1	5	6	7	6	3	5	4	3	6	5	6	6	6	7	6	5	3
200	0	1	1	1	2	豆腐做的各种假肉	1	2	0	0	0	0	2	2	1	1	2	2	2	2	6	5	7	6	7	6	5	5	5	7	6	5	6	6	5	7	2
201	0	1	1	1	1	更健康	1	3	0	0	0	0	1	2	3	2	3	2	1	1	5	4	4	6	2	5	2	4	5	6	6	6	6	6	6	5	2
202	0	1	1	1	4	关晓彤植物肉	1	1	0	0	0	0	1	1	2	3	1	3	3	2	5	6	6	7	3	2	3	4	3	5	4	3	3	4	4	3	3
203	0	1	1	1	1	吃海鲜	1	1	0	0	0	0	1	2	1	2	1	2	1	2	5	6	4	7	5	7	3	4	5	7	7	6	5	6	4	5	2
204	0	1	1	1	3	植物肉	1	3	0	0	0	0	1	3	3	2	1	2	3	1	3	5	5	4	4	6	4	4	3	3	5	5	5	6	6	5	2
205	0	1	1	1	3	豆制品	3	3	0	0	0	0	1	2	1	2	2	1	2	2	6	4	7	6	3	5	3	4	5	6	5	5	6	6	5	5	2
206	0	1	0	1	4	素食肉味	1	3	0	0	0	0	1	1	2	2	1	2	2	1	5	6	6	7	3	5	2	2	5	6	5	5	6	6	7	5	4
207	0	1	0	1	2	鸡胸肉	1	1	0	0	0	0	1	2	1	2	2	1	2	2	4	6	6	6	6	6	6	5	3	5	5	6	5	6	5	4	2
208	0	1	0	1	1	便宜。	1	3	0	0	0	0	1	1	2	2	2	1	2	1	4	6	5	6	4	3	4	6	4	5	4	6	5	4	5	5	3
209	0	1	0	1	1	小众	1	3	0	0	0	0	1	3	2	2	1	2	2	1	6	2	5	7	2	6	1	4	7	6	5	4	6	4	5	5	2
210	0	1	1	1	1	素食肉	1	2	0	0	0	0	1	2	1	2	2	1	1	2	5	3	6	7	4	5	3	4	5	6	5	6	5	5	6	7	2
211	0	1	1	1	1	鸡蛋、豆腐	1	3	0	0	0	0	2	1	2	2	1	1	2	2	5	3	5	7	4	6	3	2	6	4	5	6	6	7	4	7	2
212	0	1	0	1	1	健康的饮食	1	1	0	0	0	0	2	1	2	1	2	2	1	1	7	5	7	7	2	6	2	4	6	6	6	6	3	5	5	6	1
213	0	1	1	1	1	实惠且好吃	1	2	0	0	0	0	1	3	2	2	1	2	2	1	5	4	6	5	4	5	4	6	4	4	6	5	5	5	6	5	2
214	0	1	1	1	3	不长胖	1	1	0	0	0	0	1	2	2	2	2	1	2	2	6	4	5	5	5	4	4	5	6	3	6	3	5	6	6	5	2
215	0	1	1	2	1	豆腐	1	3	0	0	0	0	1	2	3	3	2	3	3	1	2	4	7	4	3	4	3	6	2	4	6	6	5	4	6	6	2
216	0	1	0	4	3	不健康	1	2	0	0	0	0	1	2	1	1	2	2	3	1	2	6	7	2	6	2	5	7	1	2	6	7	5	7	6	5	4
217	0	1	1	1	3	素肉	3	3	0	0	0	0	1	2	3	3	3	3	3	3	4	4	4	5	3	5	4	4	4	5	5	5	5	5	5	5	1
218	0	1	1	1	1	大豆，素肉	1	3	0	0	0	0	1	3	1	2	2	3	2	3	6	4	4	5	3	5	3	5	1	4	5	5	4	3	5	4	3
219	0	1	1	1	2	人造	3	1	0	0	0	0	1	2	2	3	1	2	2	1	3	7	7	5	3	1	5	7	1	5	5	5	6	6	6	7	2
220	0	1	1	2	3	手撕牛肉豆腐	1	3	0	0	0	0	1	2	2	2	2	3	3	1	5	3	6	6	1	6	2	4	3	5	6	5	5	6	5	5	3
221	0	1	1	1	3	香肠	3	3	0	0	0	0	3	1	1	1	2	2	2	2	4	6	7	5	4	5	2	4	5	5	6	6	7	7	7	7	3
222	0	1	0	1	3	素食主义者	1	2	0	0	0	0	1	2	1	2	1	1	2	2	4	6	6	4	3	6	2	2	5	4	4	5	4	5	4	4	2
223	0	1	1	1	1	口感怎么样	3	3	0	0	0	0	1	2	1	1	2	1	1	1	5	4	4	4	3	5	3	4	6	6	5	5	5	4	6	6	2
224	0	1	1	1	3	干净卫生，有营养	3	1	0	0	0	0	1	2	1	1	1	1	2	1	6	4	3	7	2	5	4	5	2	6	4	6	5	7	4	4	3
225	0	1	0	1	4	有肉的质感和味道	1	3	0	0	0	0	1	3	1	2	2	3	2	3	3	5	6	4	5	3	5	6	3	4	5	6	6	7	6	4	2
226	0	1	1	1	2	素肉	3	3	0	0	0	0	1	2	1	2	3	3	3	3	4	5	5	5	4	5	5	6	2	6	3	3	3	5	5	4	2
227	0	1	0	1	1	尖椒炒肉	3	2	0	0	0	0	1	3	3	3	3	3	3	3	5	6	6	5	2	5	4	3	3	4	5	3	4	5	4	5	2
228	0	1	1	2	1	素肉	1	3	0	0	0	0	1	3	2	2	2	2	2	1	2	7	7	4	6	5	5	7	1	4	5	4	3	3	5	5	2
229	0	1	1	1	3	可再生	1	3	0	0	0	0	2	2	1	2	1	2	2	1	4	5	6	6	2	5	3	4	2	6	5	4	5	5	5	4	1
230	0	1	0	1	4	合成肉，素肉	1	1	0	0	0	0	1	3	3	3	3	3	2	3	5	4	7	4	2	5	3	5	2	4	2	1	1	1	3	3	3
231	0	1	0	1	1	豆制品	1	1	0	0	0	0	1	2	2	2	2	1	2	2	5	4	4	5	3	5	4	5	4	6	5	6	6	5	6	6	4
232	0	1	0	1	2	蔬菜	1	3	0	0	0	0	1	3	2	3	2	3	2	1	4	6	7	4	6	4	6	5	4	6	4	4	6	5	6	4	2
233	0	1	1	1	4	不健康，没有营养	3	2	0	0	0	0	1	2	1	2	3	3	2	2	6	4	5	7	1	6	1	4	5	6	4	5	5	7	6	6	4
234	0	1	1	1	4	素牛肉，豆制品	1	1	0	0	0	0	1	2	2	2	1	1	1	1	5	4	6	7	4	6	4	5	4	6	6	5	5	5	6	5	2
235	0	1	1	1	2	素肉	1	3	0	0	0	0	1	2	1	2	2	1	2	2	5	5	4	5	2	6	4	2	1	6	5	5	5	6	4	5	2
236	0	1	1	1	1	素食肉	3	3	0	0	0	0	1	2	1	2	1	2	2	1	2	4	3	5	1	6	3	2	3	4	4	3	2	5	4	4	2
237	0	1	1	1	4	豆制品代替肉，植物肉。	1	3	0	0	0	0	1	2	1	2	3	1	2	2	2	4	2	6	3	6	3	4	4	4	5	3	3	3	4	4	2
238	0	1	1	1	4	素肉	3	3	0	0	0	0	1	2	1	2	2	1	2	2	3	6	5	4	4	3	5	7	3	4	6	5	7	7	6	5	2
239	0	1	1	1	3	人工培育	1	3	0	0	0	0	1	2	1	1	2	2	2	1	6	4	5	6	4	6	4	3	5	5	5	5	4	5	4	5	2
240	0	1	0	1	3	人造肉，大豆蛋白合成肉	1	1	0	0	0	0	1	2	1	2	2	2	1	2	4	3	3	5	4	5	2	4	3	4	4	3	3	4	3	3	1
241	0	1	1	4	4	虾滑	1	3	0	0	0	0	1	2	2	2	3	3	2	1	4	5	7	7	1	2	3	7	5	7	7	7	6	5	4	4	1
242	0	1	1	1	3	就是用不是肉做的	1	2	0	0	0	0	2	2	1	2	2	3	1	1	5	3	4	6	2	3	3	2	2	3	4	5	3	2	2	2	2
243	0	1	0	3	3	素肉	3	1	0	0	0	0	2	2	1	2	1	2	1	2	5	4	6	5	4	5	6	4	2	5	6	5	7	6	5	4	3
244	0	1	0	2	2	火腿	1	2	0	0	0	0	1	2	2	2	2	1	2	2	6	4	6	7	4	5	6	7	4	5	4	5	6	4	4	5	2
245	0	1	0	1	3	素肉	1	1	0	0	0	0	1	2	1	2	1	2	2	1	2	4	5	7	3	7	2	5	2	5	5	6	5	7	6	5	3
246	0	1	0	1	4	各类以豆制品做成的“素肉”	1	3	0	0	0	0	1	2	1	2	1	1	2	2	4	4	6	5	4	4	3	2	3	4	5	5	4	5	5	5	3
247	0	1	0	1	4	转基因	1	1	0	0	0	0	1	2	1	2	2	1	2	2	5	4	5	4	5	4	5	3	5	3	6	5	4	5	6	7	4
248	0	1	0	1	2	合成肉，淀粉肉，死肉，肉渣。	3	3	0	0	0	0	1	2	2	2	2	1	2	2	5	6	7	6	3	7	4	5	4	5	5	4	5	5	4	4	2
249	0	1	0	1	4	人造肉	1	3	0	0	0	0	1	2	2	2	2	2	1	1	4	4	6	5	4	4	4	3	4	5	5	5	4	5	5	6	2
250	0	1	0	1	4	合成肉，科技肉，不是真实的肉，是通过淀粉之类的东西加工而来的肉	1	2	0	0	0	0	1	3	3	3	3	3	2	3	3	7	7	2	7	3	4	3	4	4	4	2	2	2	4	4	1
251	0	1	0	1	2	豆制品	1	1	0	0	0	0	2	1	2	2	1	2	2	1	4	6	4	5	6	3	5	5	5	3	6	5	6	3	6	5	3
252	0	1	0	2	1	素肉	1	2	0	0	0	0	1	2	3	1	2	2	1	1	4	5	4	5	3	6	4	3	5	6	3	2	2	3	2	3	2
253	0	1	0	1	1	可以代替肉类的非肉类食品	1	1	0	0	0	0	1	2	1	1	2	2	2	1	7	2	3	6	1	7	2	3	6	7	4	6	3	5	4	1	3
254	0	1	0	1	3	类似素牛肉的食物？用植物蛋白等，加上调味料，模仿荤肉的口感。	1	3	0	0	0	0	1	2	2	2	2	1	2	2	5	4	3	6	2	6	3	4	6	5	5	4	5	4	5	4	3
255	0	1	0	1	1	合成肉，豆腐等	1	1	0	0	0	0	1	2	2	2	1	2	2	1	7	3	7	7	2	7	2	4	7	6	6	5	5	4	6	6	2
256	0	1	0	1	1	用素食做成肉类的外形	3	3	0	0	0	0	1	2	1	2	2	2	2	2	4	6	7	6	2	6	7	6	2	6	7	7	7	7	7	7	2
257	0	1	0	1	1	口感	1	2	0	0	0	0	1	1	2	2	2	2	1	1	4	5	6	6	2	6	4	1	4	4	6	4	2	4	6	1	2
258	0	1	0	1	3	大豆蛋白	1	3	0	0	0	0	1	2	1	2	2	2	2	1	7	5	7	7	1	4	2	6	1	7	2	7	2	7	5	6	2
259	0	1	0	2	4	鸡蛋	3	2	0	0	0	0	3	3	3	3	3	3	3	3	4	4	5	4	4	4	4	5	3	4	5	5	5	6	6	6	3
260	0	1	0	1	3	夹肉	1	3	0	0	0	0	1	2	2	1	1	2	1	1	5	1	3	6	2	7	4	2	6	7	7	5	6	4	7	6	2
261	0	1	1	2	2	营养价值	3	3	0	0	0	0	1	2	2	2	1	2	1	1	5	4	6	5	3	5	4	6	3	5	6	5	5	6	5	6	2
262	0	1	0	1	3	人造肉	3	3	0	0	0	0	1	2	1	2	2	1	2	1	4	6	6	6	4	5	5	4	4	3	5	3	3	4	4	5	1
263	0	1	0	1	1	植物类肉味产品	1	2	0	0	0	0	1	1	1	1	2	1	2	1	4	3	5	5	6	7	2	1	4	6	5	5	4	6	6	5	3
264	0	1	0	1	3	豆类食品做出来的口感类似肉类的食品	1	1	0	0	0	0	1	2	1	1	2	2	2	1	6	4	4	6	2	5	2	4	4	5	4	4	4	5	5	4	2
265	0	1	0	1	1	植物蛋白	1	1	0	0	0	0	1	2	1	2	1	2	2	2	6	3	5	6	2	7	1	6	1	3	3	2	2	3	5	5	1
266	0	1	0	1	4	新奇	2	1	0	0	0	0	1	2	1	2	1	2	2	1	3	6	5	3	4	2	3	4	2	3	2	3	1	3	4	2	3
267	0	1	0	1	4	植物蛋白	3	1	0	0	0	0	1	2	1	2	3	3	3	2	2	4	5	4	4	3	5	6	2	4	5	5	6	7	4	5	3
268	0	1	0	1	2	科技与狠活	3	2	0	0	0	0	1	2	1	2	1	2	1	2	4	5	6	4	4	5	3	5	2	3	4	3	2	4	4	5	1
269	0	1	0	1	3	尝试做素食主义者	1	3	0	0	0	0	1	1	2	3	2	3	3	3	5	4	6	6	4	6	2	2	4	6	5	3	5	7	5	6	2
270	0	1	0	1	2	廉价的，营养物质含量低的，不安全的	1	3	0	0	0	0	1	2	1	1	1	2	2	1	3	6	7	4	6	5	5	4	3	4	4	5	5	5	5	4	1
271	0	1	0	1	4	人造肉	1	3	0	0	0	0	1	3	2	2	1	3	3	1	5	6	6	4	6	5	2	4	4	4	3	2	3	5	4	3	2
272	0	1	0	1	1	人造肉	3	3	0	0	0	0	1	2	1	2	2	1	2	2	6	5	2	6	6	5	6	3	5	6	6	4	4	5	4	6	2
273	0	1	0	1	1	挺好吃的	1	1	0	0	0	0	2	2	1	2	3	1	2	1	4	3	6	5	6	4	6	5	7	3	6	5	4	7	3	5	2
274	0	1	0	1	3	豆制品	1	1	0	0	0	0	1	2	1	2	1	2	2	1	5	5	7	5	6	5	6	7	4	5	6	5	6	6	5	6	3
275	0	1	0	1	4	大豆蛋白	1	3	0	0	0	0	1	3	2	3	1	3	2	1	5	4	2	4	3	5	4	5	3	4	5	5	4	5	6	5	3
276	0	1	0	1	2	素肉汉堡	1	3	0	0	0	0	1	2	1	2	2	1	2	2	5	6	4	5	4	5	3	4	3	5	5	6	5	6	5	4	2
277	0	1	0	1	2	鸡蛋，豌豆	1	3	0	0	0	0	1	2	2	3	1	2	3	2	6	3	5	6	2	6	2	3	4	6	7	6	6	6	7	6	2
278	0	1	0	1	3	人造肉	1	1	0	0	0	0	1	2	1	2	2	1	2	1	3	5	6	4	5	4	6	5	3	5	6	5	6	7	6	5	2
279	0	1	0	1	2	植物蛋白，植物肉	1	3	0	0	0	0	1	2	1	1	2	2	2	1	6	4	3	6	2	7	2	4	6	6	5	4	4	6	6	5	3
280	0	1	0	1	2	人造肉	1	2	0	0	0	0	1	2	2	2	2	1	1	2	6	2	4	5	4	3	5	3	5	3	5	5	3	7	6	5	2
281	0	1	0	1	4	豆干	1	1	0	0	0	0	2	1	2	1	1	2	1	1	4	4	5	6	4	5	5	6	5	6	4	5	5	4	5	6	2
282	0	1	0	2	4	不健康	1	3	0	0	0	0	1	2	1	1	1	1	2	2	6	5	6	5	6	5	7	6	4	5	6	4	5	4	5	5	3
283	0	1	0	1	4	某种蘑菇 面制品	3	1	0	0	0	0	1	2	2	2	1	2	2	2	4	5	6	4	4	5	4	3	4	4	6	4	4	4	5	4	1
284	0	1	1	2	2	素菜做的肉味道	1	2	0	0	0	0	2	1	1	2	1	2	3	1	6	3	5	2	5	3	6	3	5	3	4	3	6	3	6	2	2
285	0	1	0	1	1	素肉，豆制品，跟动物肉很相似	1	1	0	0	0	0	1	2	2	2	1	2	2	1	6	2	7	5	1	5	2	3	5	6	4	5	6	3	4	5	2
286	0	1	0	1	2	素牛排	1	3	0	0	0	0	1	3	2	3	3	3	2	1	5	4	6	7	4	5	4	3	2	5	5	4	5	4	6	5	2
287	0	1	0	1	1	素肉	1	3	0	0	0	0	2	2	1	2	1	3	2	1	7	5	3	4	2	7	1	5	6	7	6	7	7	6	6	7	4
288	0	2	1	1	1	吃素，健康	1	1	0	0	0	0	2	1	2	2	1	1	2	2	7	5	4	6	1	7	4	3	2	6	7	6	5	6	7	6	2
289	0	2	1	1	3	人造肉	3	2	0	0	0	0	2	1	2	2	1	1	2	2	7	5	6	4	3	4	6	3	5	5	6	4	3	4	6	4	2
290	0	2	1	1	1	大豆	1	1	0	0	0	0	1	2	1	1	2	2	1	1	5	6	7	5	3	6	5	4	6	5	4	5	6	7	6	4	2
291	0	2	1	1	1	素肉类的辣条	1	2	0	0	0	0	2	1	1	1	2	1	2	2	4	3	6	6	4	6	4	1	5	6	6	5	4	5	5	6	3
292	0	2	1	1	3	仿肉食，	3	3	0	0	0	0	2	1	2	2	3	1	2	1	4	4	5	5	2	4	4	3	1	5	6	6	5	5	6	3	1
293	0	2	1	1	2	味道和真正的肉类有区别	1	1	0	0	0	0	1	1	2	2	1	2	2	1	3	6	7	5	2	6	5	4	2	3	6	5	6	6	6	7	2
294	0	2	0	1	1	人造肉或者豆制品或者别的	1	2	0	0	0	0	1	1	2	2	1	2	2	1	7	4	6	7	2	7	2	4	7	6	6	5	7	6	4	6	2
295	0	2	1	2	1	好吃	1	2	0	0	0	0	1	1	2	2	1	1	2	1	6	5	5	6	5	4	5	4	5	5	7	6	7	6	6	7	2
296	0	2	1	1	1	素肉	1	3	0	0	0	0	3	3	3	3	3	3	1	3	6	4	5	7	2	5	2	2	6	7	6	5	6	4	5	5	3
297	0	2	1	1	2	有肉感	1	3	0	0	0	0	2	1	2	1	2	2	1	1	3	5	5	4	4	5	4	3	4	3	4	3	3	3	4	4	3
298	0	2	1	1	3	人造	1	1	0	0	0	0	1	3	2	1	1	3	2	1	5	2	6	7	3	6	2	7	1	4	4	5	3	6	5	4	2
299	0	2	1	1	2	豆制品，素馊酒肉	1	3	0	0	0	0	1	1	2	1	2	1	2	1	6	2	5	5	3	5	3	4	4	5	5	4	5	5	5	6	3
300	0	2	1	1	1	鱼豆腐蟹棒等食品	3	3	0	0	0	0	1	1	2	2	3	3	2	1	7	5	7	5	3	4	2	6	1	4	6	5	6	7	7	4	2
301	0	2	1	1	3	人造肉	1	3	0	0	0	0	1	1	2	1	2	1	2	1	6	5	4	7	1	4	3	2	1	1	4	5	6	5	6	5	1
302	0	2	0	1	1	素食	3	3	0	0	0	0	1	1	2	1	2	2	1	1	6	5	6	5	4	5	5	6	1	4	5	5	6	4	5	5	3
303	0	2	0	1	1	健康美味	1	2	0	0	0	0	1	1	2	2	1	1	1	1	5	2	3	6	2	6	1	3	6	7	4	6	7	6	7	7	2
304	0	2	0	1	3	人造	1	1	0	0	0	0	1	1	2	2	1	1	1	1	6	4	7	5	5	6	2	7	1	4	6	6	5	7	7	6	2
305	0	2	1	1	3	用素食做成的肉味食品	1	3	0	0	0	0	1	1	2	2	2	1	2	1	7	3	3	7	2	6	3	3	6	7	5	6	5	6	5	5	3
306	0	2	0	1	3	素食主义者的肉类平替品	3	3	0	0	0	0	1	1	2	3	1	2	1	3	5	4	6	5	3	6	2	3	1	6	7	6	6	6	6	5	2
307	0	2	0	2	1	可以用别的东西来代替肉，可以是其他的面食做成肉的口味	1	1	0	0	0	0	1	2	1	2	1	2	1	2	4	5	4	6	5	3	5	4	6	5	5	4	3	5	4	5	2
308	0	2	0	1	4	便宜的	1	3	0	0	0	0	3	1	2	3	3	3	2	3	4	3	5	6	3	5	3	2	4	5	3	5	4	3	6	4	2
309	0	2	0	1	3	植物肉	1	3	0	0	0	0	1	1	2	3	1	2	1	3	4	6	6	5	3	3	5	2	6	4	4	2	2	5	2	5	3
310	0	2	0	1	2	不健康	3	1	0	0	0	0	1	1	1	2	2	1	1	2	4	5	6	4	2	5	5	4	2	6	5	4	7	6	4	5	2
311	0	2	1	1	3	面粉制品	1	3	0	0	0	0	1	1	2	1	2	1	2	1	4	5	7	6	4	5	3	2	4	5	5	5	4	6	5	6	2
312	0	2	0	1	1	大豆蛋白代替肉制品	1	3	0	0	0	0	2	1	2	2	1	2	2	1	7	4	6	7	3	6	4	3	7	4	4	5	6	7	5	6	1
313	0	2	1	1	1	健康环保	1	1	0	0	0	0	2	1	3	2	1	1	2	3	6	4	7	6	3	5	2	6	4	6	7	6	6	5	7	7	3
314	0	2	1	1	1	素食	3	3	0	0	0	0	1	1	2	2	3	2	2	1	3	5	5	4	4	5	4	5	2	6	5	4	5	6	5	6	2
315	0	2	1	1	1	带有肉味	1	1	0	0	0	0	1	1	2	2	1	2	2	1	4	6	7	6	2	4	3	4	4	5	5	5	4	7	6	4	1
316	0	2	0	1	2	人造肉	1	1	0	0	0	0	1	1	2	1	2	2	1	3	6	2	1	5	1	6	2	7	4	5	6	5	6	7	4	3	2
317	0	2	1	2	1	口感不一样有点假没肉好吃	1	1	0	0	0	0	1	1	1	1	2	2	1	2	5	6	6	7	3	5	4	5	2	5	5	6	6	7	7	6	2
318	0	2	1	1	3	茄子	1	2	0	0	0	0	1	1	1	1	1	1	1	1	4	5	6	5	5	4	3	4	2	5	5	7	6	7	5	4	3
319	0	2	1	2	1	是 猪肉脯	1	1	0	0	0	0	1	1	1	1	1	1	1	2	5	7	1	5	5	6	7	2	4	3	5	6	6	7	6	7	2
320	0	2	0	1	1	人造肉	1	3	0	0	0	0	1	1	2	1	1	2	2	2	6	4	7	6	2	7	2	5	5	6	7	5	5	4	6	5	3
321	0	2	1	1	3	豆腐	1	3	0	0	0	0	1	1	2	1	3	2	2	1	2	3	5	6	1	6	2	4	4	5	5	5	6	7	7	6	2
322	0	2	1	1	2	素肉	1	2	0	0	0	0	1	1	2	2	2	2	1	1	2	5	7	2	5	5	4	5	2	3	6	7	6	7	6	6	2
323	0	2	1	1	1	实惠	1	1	0	0	0	0	2	1	2	1	2	1	1	2	7	4	6	5	4	2	3	3	6	5	6	7	5	7	6	7	3
324	0	2	1	2	1	便宜了	1	3	0	0	0	0	1	1	2	1	1	1	1	1	3	5	3	4	3	5	4	3	4	5	3	5	5	4	5	4	2
325	0	2	1	1	3	人造肉类产品	1	2	0	0	0	0	2	1	2	2	1	1	1	1	5	6	6	6	3	6	3	5	4	6	5	3	5	5	4	5	1
326	0	2	0	1	1	牛排	1	1	0	0	0	0	1	1	2	2	1	2	1	2	6	5	6	6	3	6	5	5	4	7	5	4	5	4	6	5	1
327	0	2	1	1	3	合成肉	1	2	0	0	0	0	1	3	2	3	3	3	2	3	3	5	6	4	5	3	5	5	3	6	6	7	6	6	7	6	2
328	0	2	1	2	3	猪肉	3	1	0	0	0	0	2	1	2	1	2	3	2	1	5	2	6	4	2	5	3	7	2	6	6	2	7	5	2	6	2
329	0	2	0	1	2	人造肉	1	1	0	0	0	0	1	1	2	1	1	2	1	1	6	3	5	6	5	6	6	5	5	6	6	6	7	6	7	6	4
330	0	2	1	4	2	味道像	2	1	0	0	0	0	1	3	2	2	3	1	2	3	5	4	3	5	5	7	6	2	3	1	3	4	3	5	7	6	2
331	0	2	1	1	3	素食汉堡	1	3	0	0	0	0	1	1	2	1	3	3	1	3	3	6	7	5	2	5	5	4	5	7	2	3	2	5	4	1	3
332	0	2	1	1	3	肉类代替品，非肉类，蛋白质，与肉类作用相符	1	3	0	0	0	0	1	1	2	1	1	2	1	1	5	5	7	6	2	6	3	1	7	5	6	4	5	7	6	7	2
333	0	2	1	1	3	新鲜，好奇	1	3	0	0	0	0	1	1	2	1	1	1	1	1	5	6	7	5	4	5	3	6	2	5	7	7	6	7	7	5	3
334	0	2	1	1	3	蛋白质，补充蛋白质的非肉类食品	1	1	0	0	0	0	1	1	1	1	1	2	2	1	5	4	6	7	3	5	4	4	3	5	7	5	4	5	6	7	2
335	0	2	1	3	3	午餐肉	3	1	0	0	0	0	2	2	2	2	1	1	2	1	5	6	5	5	5	6	4	3	5	4	3	5	4	5	3	5	3
336	0	2	1	1	3	大豆制品	1	2	0	0	0	0	1	1	2	1	1	1	1	2	6	4	7	7	3	7	1	1	5	6	4	4	4	5	4	2	2
337	0	2	1	1	3	豆浆	3	1	0	0	0	0	2	1	2	1	2	1	1	1	7	4	7	5	2	5	4	2	3	4	6	5	7	6	5	4	2
338	0	2	1	1	1	健康	1	1	0	0	0	0	2	1	1	1	2	1	1	1	5	3	4	6	3	6	3	4	4	6	6	7	5	5	6	6	4
339	0	2	1	1	1	营养价值	3	3	0	0	0	0	1	1	1	1	1	2	1	2	3	6	6	4	3	5	3	6	2	3	2	2	5	5	3	4	4
340	0	2	0	1	3	豆类制品。	1	3	0	0	0	0	1	1	2	1	1	2	1	1	5	4	6	4	3	5	3	3	4	5	4	3	3	4	4	3	2
341	0	2	0	1	2	合成肉	3	3	0	0	0	0	1	1	2	1	1	2	1	2	5	3	5	5	2	6	2	4	3	5	6	6	5	7	5	6	2
342	0	2	1	1	1	植物肉	1	3	0	0	0	0	1	1	2	1	1	1	1	1	6	4	7	6	2	6	1	7	4	6	7	6	7	5	6	3	2
343	0	2	0	1	1	不好吃	1	2	0	0	0	0	2	1	2	1	2	1	1	1	5	4	4	5	5	4	4	4	5	5	5	4	4	4	5	5	2
344	0	2	0	1	3	味道很像肉 营养也跟肉差不多的非肉类食品	3	2	0	0	0	0	1	1	2	3	1	2	1	3	7	2	1	6	2	6	5	7	5	4	5	3	5	6	5	5	2
345	0	2	0	1	1	素肉	1	3	0	0	0	0	3	3	2	1	1	2	2	3	4	4	5	7	3	6	3	3	5	6	7	6	6	5	6	5	2
346	0	2	1	1	1	人造肉	1	3	0	0	0	0	2	1	1	1	2	1	2	2	4	6	6	6	3	6	4	4	5	5	4	4	4	5	5	4	3
347	0	2	0	1	1	合成肉	1	3	0	0	0	0	1	1	2	2	2	2	2	1	3	5	6	4	3	2	5	5	3	4	5	5	6	6	7	5	2
348	0	2	1	1	3	人造肉	3	3	0	0	0	0	1	1	2	2	2	2	1	1	7	3	3	7	1	7	3	3	3	7	7	7	7	7	7	7	1
349	0	2	0	1	1	素肉	1	3	0	0	0	0	1	1	2	2	1	2	1	1	4	5	4	5	3	5	3	4	5	5	4	4	4	4	4	4	1
350	0	2	0	1	1	人造肉	1	2	0	0	0	0	1	2	2	1	2	1	1	2	5	4	3	5	2	5	4	3	3	4	5	5	6	7	7	6	1
351	0	2	1	1	2	就是肉肠	1	3	0	0	0	0	1	1	1	3	3	2	2	1	3	7	7	6	6	7	6	4	3	2	5	7	6	3	5	6	1
352	0	2	1	1	3	口感吃着像肉	1	3	0	0	0	0	1	1	2	2	2	2	2	1	5	6	6	7	3	6	4	3	3	5	6	6	5	5	6	6	2
353	0	2	1	1	1	豆制品，素肉	3	2	0	0	0	0	1	1	2	1	1	2	2	2	7	4	3	6	2	6	2	3	5	5	5	6	5	6	7	6	4
354	0	2	1	1	3	豆制品	1	3	0	0	0	0	1	1	2	3	1	3	1	2	5	6	4	6	3	5	5	2	5	6	4	3	2	4	2	3	2
355	0	2	0	1	3	淀粉肠	1	2	0	0	0	0	1	1	2	3	1	2	1	3	7	2	5	7	1	7	1	2	1	7	7	6	2	5	6	6	4
356	0	2	1	1	1	减肥	1	3	0	0	0	0	1	1	2	1	1	1	1	1	5	6	7	5	3	5	3	6	5	6	6	5	6	7	5	6	1
357	0	2	0	1	2	人工合成的午餐肉	1	3	0	0	0	0	1	1	2	2	1	2	1	1	2	6	6	4	2	3	6	6	3	4	6	7	7	6	7	6	2
358	0	2	1	1	3	午餐肉	3	3	0	0	0	0	1	1	2	2	2	1	1	1	5	5	6	3	4	5	5	2	1	4	4	5	4	5	6	6	2
359	0	2	1	2	2	手撕素牛肉 素鸡	1	3	0	0	0	0	3	1	2	2	2	1	1	3	4	5	4	4	4	5	3	4	2	4	4	5	5	5	5	5	4
360	0	2	1	1	1	腐竹	1	1	0	0	0	0	2	1	1	1	2	1	2	1	6	4	3	5	2	5	4	5	2	5	6	5	4	6	6	7	3
361	0	2	1	1	3	豆制品	1	3	0	0	0	0	2	1	2	1	2	1	1	1	7	1	1	7	1	7	1	2	3	7	3	3	5	6	6	5	3
362	0	2	0	1	2	人工合成肉	1	2	0	0	0	0	1	1	2	3	2	2	1	1	2	3	2	3	4	2	4	3	4	3	2	4	2	4	2	3	2
363	0	2	1	2	1	很好吃	1	2	0	0	0	0	1	1	2	1	1	1	2	1	5	4	6	6	5	6	3	3	4	5	6	5	6	4	5	4	3
364	0	2	1	1	1	辣条	1	3	0	0	0	0	2	1	2	3	2	2	1	1	6	4	6	5	3	5	3	4	4	5	5	5	6	5	6	4	3
365	0	2	1	1	1	丸子	3	1	0	0	0	0	1	1	2	1	1	2	1	2	5	6	7	5	1	5	3	4	2	6	7	6	5	6	7	4	2
366	0	2	1	1	3	鸡蛋，豆腐	3	1	0	0	0	0	1	1	2	2	2	2	2	1	5	4	7	6	3	5	4	6	2	7	5	4	7	5	6	4	4
367	0	2	1	1	1	豆腐	1	3	0	0	0	0	2	1	1	1	2	1	1	1	6	4	4	5	3	6	4	4	4	5	6	5	3	7	3	4	2
368	0	2	1	1	1	素肉	1	3	0	0	0	0	1	1	2	1	2	1	2	1	5	5	4	5	3	6	6	2	6	4	4	4	4	4	3	3	3
369	0	2	0	1	3	火腿肠?压缩饼干?	1	2	0	0	0	0	1	1	2	2	2	2	1	1	5	4	5	6	3	6	3	4	5	6	6	5	5	5	6	5	2
370	0	2	1	1	1	挺好吃	1	2	0	0	0	0	2	1	2	2	1	1	1	1	5	4	6	5	3	6	3	5	5	6	5	4	4	5	4	4	2
371	0	2	0	1	1	豆制品或者是大豆蛋白	1	3	0	0	0	0	1	1	1	1	1	2	2	1	6	4	7	7	3	5	4	4	6	6	6	5	6	5	7	7	3
372	0	2	1	1	3	健康	3	3	0	0	0	0	1	1	2	2	2	2	1	1	6	4	6	7	2	5	5	6	5	6	6	7	6	6	7	6	2
373	0	2	1	1	1	豆腐、香肠	1	2	0	0	0	0	2	1	2	1	2	1	1	1	7	3	3	6	2	6	2	2	6	7	5	5	5	6	6	5	4
374	0	2	1	1	1	doufu	1	3	0	0	0	0	1	1	2	2	2	1	1	1	4	6	5	7	3	7	1	2	3	5	6	4	5	7	7	5	2
375	0	2	0	1	1	没有脂肪，比较健康	1	1	0	0	0	0	1	1	1	1	2	1	2	1	6	5	6	7	2	6	1	5	3	7	7	7	4	6	6	7	3
376	0	2	1	1	2	植物肉	1	3	0	0	0	0	1	1	2	1	1	2	2	1	6	4	5	7	1	6	3	4	5	6	5	4	6	6	7	4	4
377	0	2	1	1	3	合成肉	1	3	0	0	0	0	1	1	2	1	1	2	1	1	5	4	6	5	4	5	4	5	2	4	5	4	4	5	4	4	1
378	0	2	0	1	3	豆制品	1	1	0	0	0	0	1	3	2	1	2	2	1	1	5	4	4	6	3	6	3	3	4	5	4	3	4	4	3	6	2
379	0	2	1	1	3	淀粉	1	1	0	0	0	0	3	1	3	3	3	3	2	3	4	5	5	6	4	5	4	5	4	6	6	4	5	6	5	5	1
380	0	2	1	1	1	素牛排	1	3	0	0	0	0	1	1	2	2	1	2	2	1	4	5	5	3	5	4	5	4	5	4	5	6	4	5	6	6	2
381	0	2	1	1	1	素食主义者	1	2	0	0	0	0	1	1	2	1	1	1	1	1	5	3	6	6	3	2	2	3	2	6	5	5	5	6	5	3	3
382	0	2	1	1	1	不太健康	1	2	0	0	0	0	1	1	2	2	2	2	1	1	6	4	5	6	3	4	4	3	4	6	5	4	5	5	6	6	2
383	0	2	0	1	3	Very good	1	2	0	0	0	0	2	1	2	1	1	2	1	1	4	5	4	5	4	5	6	2	5	5	6	4	5	3	6	7	2
384	0	2	1	1	1	豆制品	1	2	0	0	0	0	1	1	2	1	2	1	1	1	4	5	7	5	2	4	4	3	4	6	4	5	6	5	6	7	2
385	0	2	1	1	1	蛋白制品	1	3	0	0	0	0	1	1	2	2	1	1	1	1	4	5	6	6	2	5	3	4	4	5	5	4	5	6	5	4	2
386	0	2	0	1	1	豆类代替品	1	3	0	0	0	0	3	1	2	3	1	2	1	3	3	6	7	5	3	4	4	5	3	5	6	6	6	4	6	4	2
387	0	2	1	1	3	豆制的假肉	1	1	0	0	0	0	1	1	2	2	2	2	1	1	5	7	4	6	5	6	5	3	4	5	5	6	5	4	7	6	1
388	0	2	0	1	2	素食馆	1	3	0	0	0	0	1	1	2	1	2	1	2	1	5	5	5	5	5	4	5	6	4	5	6	5	6	4	5	5	2
389	0	2	1	2	2	相比肉类食物来说不是很健康，它不能完全代替肉类提供身体必要的营养。	1	3	0	0	0	0	1	1	1	2	2	1	1	3	5	4	4	7	2	4	4	6	4	7	7	6	5	6	7	6	3
390	0	2	1	1	1	淀粉肠	1	3	0	0	0	0	1	1	1	1	1	1	1	1	6	5	6	5	6	5	6	5	4	7	5	4	7	5	6	2	3
391	0	2	0	1	4	不清楚	3	3	0	0	0	0	1	1	2	3	1	2	3	3	5	4	7	7	4	7	1	1	6	7	7	7	7	7	7	4	1
392	0	2	0	1	1	肉还可以被替代？	1	3	0	0	0	0	1	1	2	1	3	3	1	1	5	6	4	5	4	5	3	5	4	5	6	5	3	4	5	4	2
393	0	2	0	1	2	不好吃	2	1	0	0	0	0	2	1	2	2	1	2	2	1	3	6	4	7	5	7	5	6	4	5	3	4	2	3	1	4	2
394	0	2	1	1	3	人造肉	3	3	0	0	0	0	1	1	2	1	2	2	1	1	4	5	5	4	4	3	5	3	4	5	3	3	4	3	5	4	2
395	0	2	0	1	1	第一印象不是很好吃	3	3	0	0	0	0	1	1	2	3	1	2	1	3	5	5	4	4	5	4	6	4	5	3	5	4	3	5	5	5	2
396	0	2	1	1	4	极端素食主义	1	3	0	0	0	0	2	1	2	2	2	1	1	1	4	7	7	3	3	2	2	2	2	5	4	5	5	3	5	3	2
397	0	2	1	1	1	豆制品	1	3	0	0	0	0	1	1	2	1	3	3	2	3	7	4	5	7	3	7	3	3	6	7	5	5	5	7	6	4	3
398	0	2	1	1	3	豆类制品	1	3	0	0	0	0	3	1	2	2	3	3	2	3	7	5	6	7	2	6	3	4	5	6	7	6	6	6	6	5	3
399	0	2	1	1	1	添加剂，加工环境	1	3	0	0	0	0	1	1	2	2	2	1	2	1	4	5	6	4	5	6	3	2	6	5	6	6	5	6	5	6	2
400	0	2	1	2	1	牛奶，鸡蛋	1	3	0	0	0	0	1	1	1	2	2	1	2	1	4	5	6	5	2	5	4	3	3	4	6	6	5	4	5	5	3
401	0	2	1	1	3	素食大豆蛋白质品	1	3	0	0	0	0	1	1	2	1	2	1	1	1	6	5	4	6	2	6	4	7	2	6	4	3	2	3	4	4	3
402	0	2	1	1	3	有肉类的形态，但在内容上有差异。	1	2	0	0	0	0	3	3	2	1	3	3	1	3	7	5	7	7	5	6	3	3	3	6	5	5	6	5	5	5	2
403	0	2	1	1	1	素肉	1	3	0	0	0	0	1	1	2	1	1	1	1	2	5	6	4	7	6	5	6	7	3	5	5	6	5	5	3	5	2
404	0	2	1	1	2	大豆蛋白	1	3	0	0	0	0	1	1	2	2	1	2	2	1	5	4	5	6	3	4	5	4	2	5	6	7	5	7	6	4	2
405	0	2	1	1	3	口感和外观与肉类很相似	1	3	0	0	0	0	1	1	2	1	1	2	1	1	6	5	4	5	3	5	3	2	6	7	5	5	6	7	6	6	3
406	0	2	1	1	1	蘑菇	1	3	0	0	0	0	1	1	2	2	2	2	1	1	5	6	7	5	6	7	5	6	2	5	4	5	5	6	5	4	1
407	0	2	0	1	3	绿色环保	1	1	0	0	0	0	1	1	2	1	1	2	1	1	6	2	2	6	2	5	2	3	6	6	5	6	5	6	6	7	2
408	0	2	0	1	3	没吃过	1	3	0	0	0	0	1	1	1	1	1	1	1	1	4	3	3	4	4	5	3	2	4	3	4	5	3	6	4	2	2
409	0	2	1	1	3	不会长胖的	1	3	0	0	0	0	2	1	2	1	2	1	2	1	4	4	5	6	3	5	4	3	3	6	5	6	6	5	6	5	3
410	0	2	1	1	3	不好吃	1	3	0	0	0	0	1	1	2	3	1	2	1	2	4	6	5	5	3	4	2	5	3	4	5	6	5	6	5	4	3
411	0	2	1	1	1	鸡柳	1	3	0	0	0	0	1	1	1	1	1	2	1	1	6	3	3	6	3	6	3	4	6	7	5	4	5	5	6	6	2
412	0	2	1	1	1	豆制品，素肉，大排，用素菜做的有肉的口感的食物	1	3	0	0	0	0	1	1	2	1	3	1	2	1	4	5	7	5	2	6	3	1	7	5	5	6	6	4	4	5	4
413	0	2	1	2	3	豆腐	1	2	0	0	0	0	1	1	2	2	2	2	1	1	5	6	5	7	2	5	3	4	1	5	1	4	2	6	3	4	2
414	0	2	1	1	1	通过豆类代替肉类食物，也是非常鲜美	1	1	0	0	0	0	1	1	2	1	1	1	1	2	6	2	2	6	1	6	2	5	6	5	7	6	7	6	6	7	3
415	0	2	1	1	1	植物肉	1	2	0	0	0	0	1	1	2	2	1	2	1	1	4	6	5	4	3	4	5	5	3	4	4	3	4	5	4	3	2
416	0	2	1	1	3	豆制品	3	3	0	0	0	0	2	1	2	1	2	2	1	1	6	4	4	7	1	5	4	2	5	6	2	1	1	4	4	3	1
417	0	2	0	1	1	代替肉制品	1	3	0	0	0	0	1	1	2	2	2	2	1	1	4	3	5	6	5	3	2	4	5	6	5	3	4	5	3	3	2
418	0	2	1	1	3	不长胖的食物	1	3	0	0	0	0	1	1	2	1	1	2	2	1	5	5	3	5	3	6	6	4	6	5	6	6	4	5	5	5	2
419	0	2	0	1	2	口感跟真的差不多	1	3	0	0	0	0	1	1	2	1	2	2	1	2	4	5	6	7	6	5	4	5	3	4	4	5	6	4	5	6	2
420	0	2	0	1	1	罐头	1	1	0	0	0	0	1	1	2	2	1	2	2	2	4	5	5	5	5	6	4	5	4	6	5	6	6	5	6	6	3
421	0	2	1	1	3	人造猪肉	1	1	0	0	0	0	1	1	2	2	1	1	2	1	5	4	6	6	3	5	3	5	3	6	5	6	6	5	5	5	1
422	0	2	0	1	1	低脂肪高蛋白	1	3	0	0	0	0	2	3	1	1	3	1	3	2	5	4	4	6	3	6	2	4	4	5	6	5	5	6	6	6	2
423	0	2	1	1	1	手撕豆干	1	1	0	0	0	0	1	2	1	1	1	2	1	1	6	3	6	4	3	6	3	3	2	2	2	6	7	7	6	7	1
424	0	2	0	1	1	豆类制品，植物肉	1	3	0	0	0	0	2	2	2	1	2	2	1	2	4	3	2	7	2	6	3	4	3	7	7	4	5	4	6	7	3
425	0	2	1	1	2	植物肉	1	3	0	0	0	0	1	1	2	1	1	2	1	1	4	6	7	6	2	7	4	3	6	5	6	5	4	4	4	5	2
426	0	2	0	1	3	用其他食品做成肉的样子	3	3	0	0	0	0	1	1	2	1	2	1	2	2	4	5	4	6	3	4	2	4	6	5	5	6	7	6	7	6	2
427	0	2	1	1	1	人造肉	1	3	0	0	0	0	1	2	2	1	1	1	2	1	5	4	7	6	1	5	3	5	2	7	5	6	5	6	4	5	3
428	0	2	1	1	2	鸡胸肉	1	3	0	0	0	0	1	1	2	1	2	2	1	1	4	6	6	1	2	6	7	5	1	4	7	7	7	4	3	3	2
429	0	2	1	1	3	豆腐	3	2	0	0	0	0	2	1	2	2	2	1	2	2	6	5	2	3	2	4	3	5	7	5	5	3	6	4	6	4	3
430	0	2	1	2	1	牛奶	1	2	0	0	0	0	2	1	2	1	1	2	1	1	6	5	7	5	3	5	3	4	4	5	6	5	7	5	6	4	1
431	0	2	1	1	1	午餐肉	1	1	0	0	0	0	1	1	1	1	1	1	1	2	7	4	7	5	2	7	1	2	5	6	6	7	5	6	6	7	2
432	0	2	1	1	1	合成肉	1	3	0	0	0	0	1	1	2	2	1	1	2	2	7	4	4	6	1	7	1	5	4	7	5	6	6	5	6	7	3
433	0	2	1	1	1	素肉，大豆制品	1	3	0	0	0	0	2	1	2	2	2	1	2	1	6	3	5	6	3	6	3	2	5	6	5	4	4	5	5	4	3
434	0	2	0	1	3	口感	1	1	0	0	0	0	1	1	2	1	1	1	2	1	3	5	6	4	3	3	5	5	2	4	5	5	6	6	7	6	2
435	0	2	1	1	1	人造肉	3	1	0	0	0	0	1	1	1	1	3	2	1	1	3	4	6	5	4	5	5	3	6	4	5	6	6	7	7	7	2
436	0	2	0	1	3	人造肉	1	3	0	0	0	0	1	1	2	2	2	2	1	1	5	3	5	5	2	5	4	5	3	6	5	4	5	4	5	5	1
437	0	2	0	1	1	素食	1	3	0	0	0	0	1	1	2	1	1	1	1	1	6	4	4	6	3	6	3	4	3	5	6	5	6	4	6	2	1
438	0	2	0	1	1	大豆制品	1	3	0	0	0	0	2	1	2	2	1	1	2	1	5	5	4	6	2	6	4	3	5	6	5	5	4	6	6	4	3
439	0	2	0	1	3	植物肉	1	3	0	0	0	0	3	1	2	1	2	2	1	3	1	7	6	5	2	5	1	2	1	4	6	5	4	7	4	5	2
440	0	2	1	1	1	素肉	1	2	0	0	0	0	1	1	2	1	1	3	2	3	4	5	4	6	3	5	3	5	4	5	5	6	6	6	7	6	2
441	0	2	1	1	2	大豆	1	1	0	0	0	0	1	2	1	2	1	2	1	1	7	5	6	7	4	7	5	6	5	6	3	7	7	5	6	7	1
442	0	2	1	1	1	豆制品	1	3	0	0	0	0	2	1	2	1	1	1	1	1	6	3	5	7	2	6	1	3	6	7	6	7	6	7	7	6	4
443	0	2	1	1	2	肉丸	3	3	0	0	0	0	1	1	2	1	3	3	2	3	4	5	7	6	4	6	4	5	1	6	7	5	6	7	5	7	2
444	0	2	0	1	3	人工合成调制的肉味食物	1	3	0	0	0	0	2	1	2	2	1	1	2	1	6	2	3	7	1	7	1	2	5	6	5	5	5	6	5	6	3
445	0	2	1	1	3	肉类替代品有哪些	3	3	0	0	0	0	1	1	2	2	2	2	1	1	4	5	4	4	3	4	3	6	2	3	4	4	3	3	4	5	2
446	0	2	1	1	3	素肉	3	3	0	0	0	0	1	1	2	1	1	2	1	1	3	5	6	4	3	6	5	2	3	4	5	4	3	4	4	5	2
447	0	2	1	1	1	大豆制品	1	3	0	0	0	0	2	1	2	2	1	1	1	1	5	4	5	6	3	6	3	4	7	6	5	5	6	6	7	5	1
448	0	2	0	1	3	智商税	1	2	0	0	0	0	1	1	2	1	1	2	1	1	6	2	7	4	3	6	1	5	5	6	4	5	5	7	6	6	1
449	0	2	0	1	3	疑惑	1	3	0	0	0	0	1	2	2	2	2	2	1	1	6	5	4	6	2	5	3	5	3	6	4	4	5	6	5	6	2
450	0	2	1	1	3	材料不是真的肉但是是肉的味道的食物	1	3	0	0	0	0	2	1	2	2	2	1	1	1	4	5	6	6	4	5	4	5	3	4	5	4	5	5	5	4	2
451	0	2	0	1	1	素肉，素鸡	1	3	0	0	0	0	1	1	2	2	1	2	2	3	4	5	6	6	2	5	4	2	2	5	5	5	4	4	5	4	2
452	0	2	1	1	1	素食，植物，蔬菜，大豆	1	3	0	0	0	0	1	1	2	2	2	2	2	1	5	7	7	4	2	6	5	4	4	5	5	5	5	6	4	6	2
453	0	2	1	1	1	简单又好吃	2	3	0	0	0	0	2	2	1	1	2	2	1	2	5	3	4	5	3	5	4	2	5	6	6	5	6	7	6	6	1
454	0	2	0	1	4	素肉	1	3	0	0	0	0	1	1	1	1	2	1	2	1	4	5	6	5	4	5	5	4	3	4	5	5	6	5	5	5	2
455	0	2	0	1	3	没见过	1	3	0	0	0	0	1	1	2	1	3	2	1	3	3	6	7	5	3	5	3	4	3	5	5	4	6	6	5	6	2
456	0	2	0	1	4	植物合成肉	3	3	0	0	0	0	1	2	1	1	1	2	1	1	4	4	4	4	4	4	4	3	3	5	3	3	4	3	5	3	2
457	0	2	1	1	1	觉得还不错，挺喜欢吃的	1	2	0	0	0	0	1	1	1	1	1	1	2	2	5	3	4	6	2	7	1	4	5	6	5	6	4	4	6	2	2
458	0	2	0	1	1	便宜	1	3	0	0	0	0	2	1	2	2	2	2	1	1	7	5	3	6	2	6	1	5	7	6	5	3	2	1	7	1	2
459	0	2	1	1	2	科技与狠活	1	3	0	0	0	0	1	1	2	2	2	2	1	2	4	6	6	4	5	4	6	4	5	5	4	5	6	5	6	5	2
460	0	2	1	1	1	肉食主义者	1	1	0	0	0	0	1	1	2	1	2	1	2	2	5	6	7	6	5	4	3	7	5	3	4	5	3	6	4	7	2
461	0	2	1	1	1	豆制品	1	3	0	0	0	0	1	1	2	1	1	1	1	1	5	4	7	4	3	4	2	5	3	4	5	4	5	5	5	4	2
462	0	2	0	1	1	仿真肉	1	3	0	0	0	0	2	1	2	1	2	2	2	1	6	5	3	6	4	6	6	2	6	4	5	4	7	7	6	5	2
463	0	2	1	1	3	肉味的蔬菜	1	1	0	0	0	0	1	1	2	2	1	2	1	1	5	5	7	6	3	6	3	4	5	6	5	4	5	3	3	6	2
464	0	2	0	1	1	淀粉肠	3	2	0	0	0	0	1	1	2	2	2	2	2	2	4	5	4	5	3	5	2	5	4	3	5	4	4	5	4	4	2
465	0	2	0	1	1	人工合成肉	1	1	0	0	0	0	1	1	2	2	1	2	1	1	3	5	6	4	5	4	4	4	3	5	5	4	4	5	4	5	2
466	0	2	1	1	1	比肉便宜，脂肪少	3	3	0	0	0	0	1	1	2	1	1	1	1	1	5	4	5	6	2	5	4	3	4	6	6	6	5	6	7	6	2
467	0	2	1	1	3	有肉味但是是用其他东西做的	1	3	0	0	0	0	1	1	2	2	2	2	2	1	3	6	7	4	3	5	3	6	4	3	5	6	5	6	7	6	3
468	0	2	1	1	3	肉类替代品具体是什么样	1	3	0	0	0	0	1	1	2	1	2	1	1	1	5	4	6	4	4	5	4	3	3	4	5	4	4	6	5	6	1
469	0	2	1	2	1	人造肉，素肉干，豆干，豆制品	1	2	0	0	0	0	2	1	2	1	1	1	1	1	6	5	7	7	3	6	1	4	5	6	3	5	4	5	5	4	2
470	0	2	1	1	1	素肉	1	3	0	0	0	0	2	1	2	2	2	1	1	1	5	5	5	5	3	5	3	4	4	5	5	4	4	5	4	5	1
471	0	2	0	1	1	素牛排	1	1	0	0	0	0	1	1	2	1	1	1	2	1	3	5	6	5	5	2	4	6	3	3	6	5	5	3	4	3	3
472	0	2	0	1	3	植物肉	3	3	0	0	0	0	1	1	2	1	1	2	1	2	6	3	5	6	2	6	2	5	7	5	5	7	6	6	7	6	4
473	0	2	0	1	1	蛋白质丰富	1	3	0	0	0	0	1	1	2	1	1	1	2	1	4	5	5	4	4	4	5	5	3	3	4	5	4	5	5	4	2
474	0	2	0	1	3	人造肉	1	2	0	0	0	0	1	1	2	1	2	2	2	1	2	4	7	5	2	5	3	5	3	5	4	3	5	3	6	6	2
475	0	2	1	1	4	合成牛肉	3	3	0	0	0	0	1	1	3	3	2	1	1	2	6	3	5	7	5	7	2	1	7	6	4	6	7	6	7	7	1
476	0	2	1	1	2	植物肉	1	3	0	0	0	0	1	3	2	1	2	3	2	2	5	4	5	6	3	5	3	4	2	5	5	4	5	5	6	5	3
477	0	2	1	1	3	平替	3	3	0	0	0	0	1	1	2	1	1	1	2	1	5	6	7	6	3	5	3	6	4	5	7	6	6	7	7	6	2
478	0	2	1	1	1	素食肉类零食	1	3	0	0	0	0	2	1	2	1	2	2	1	1	7	3	6	7	2	7	2	4	7	6	7	6	6	7	6	6	3
479	0	2	0	1	1	素毛肚，人造肉	1	3	0	0	0	0	1	1	2	1	2	2	2	1	5	6	6	4	6	5	6	4	3	4	5	4	5	6	5	4	3
480	0	2	1	1	2	难吃 还是想吃肉	3	1	0	0	0	0	2	1	2	2	1	1	2	1	6	5	4	7	4	6	6	4	6	5	6	5	5	6	6	6	2
481	0	2	0	1	2	培养基因	3	3	0	0	0	0	1	1	2	2	2	2	1	2	2	5	7	4	4	5	4	6	1	5	6	4	5	4	2	5	3
482	0	2	0	1	1	合成牛肉	1	1	0	0	0	0	1	1	2	1	2	1	1	1	6	4	5	6	2	6	2	7	2	5	4	3	2	1	3	2	2
483	0	2	1	1	1	减肥	3	3	0	0	0	0	1	1	2	2	1	2	1	1	5	4	7	3	3	6	2	5	4	5	6	7	5	5	5	4	2
484	0	2	0	1	1	素鸡、面筋	1	1	0	0	0	0	1	1	1	1	1	1	1	1	6	4	7	6	3	6	3	4	5	6	3	3	4	6	6	3	2
485	0	2	1	1	1	培养肉 人造肉	1	2	0	0	0	0	1	1	2	1	2	1	2	1	4	5	6	6	3	5	6	5	4	6	7	5	6	6	6	5	2
486	0	2	0	1	2	植物、合成	1	1	0	0	0	0	1	1	1	1	2	1	2	1	2	7	7	4	5	4	5	4	2	1	2	1	4	4	3	1	2
487	0	2	1	1	2	香肠	1	3	0	0	0	0	3	1	2	1	1	2	1	2	3	5	6	6	3	5	5	3	4	5	5	5	6	5	6	5	1
488	0	2	1	1	1	代餐	3	3	0	0	0	0	1	1	2	1	3	2	2	1	6	4	2	4	2	6	1	3	1	6	5	2	1	2	4	5	2
489	0	2	1	2	1	就是那个用豆制品做的	1	3	0	0	0	0	3	1	2	1	2	2	1	1	4	5	6	4	3	4	4	6	1	4	5	5	5	7	7	6	2
490	0	2	1	1	2	人造肉	3	1	0	0	0	0	1	1	2	2	2	2	1	1	4	7	5	6	2	7	4	4	1	6	4	3	4	2	4	4	1
491	0	2	1	1	1	好吃	1	1	0	0	0	0	1	2	2	1	2	1	1	2	5	6	3	4	3	6	5	5	3	5	4	4	3	3	5	3	3
492	0	2	1	1	1	艺术品	1	3	0	0	0	0	1	1	2	1	1	2	1	1	6	3	4	7	2	6	5	2	1	6	5	3	6	7	6	5	3
493	0	2	1	2	2	素食	1	2	0	0	0	0	1	1	1	2	1	2	2	1	6	5	6	6	6	2	4	5	6	5	6	5	6	5	6	6	3
494	0	2	0	2	2	豆制品	1	1	0	0	0	0	1	2	1	2	1	1	1	2	5	4	4	4	5	5	4	5	4	5	5	4	5	4	4	5	1
495	0	2	1	1	1	不是肉	1	3	0	0	0	0	1	1	2	2	1	1	2	1	6	4	5	6	3	6	3	4	4	6	5	4	4	5	5	5	2
496	0	2	0	1	1	豆腐类制品	1	3	0	0	0	0	2	1	2	1	1	1	1	1	5	3	4	5	3	5	3	5	4	4	6	4	6	7	6	6	1
497	0	2	1	1	1	鸡胸肉	1	1	0	0	0	0	2	1	1	2	1	2	1	1	6	4	4	5	6	5	6	5	5	6	6	5	6	4	6	5	3
498	0	2	0	1	1	无	1	2	0	0	0	0	1	1	2	1	2	1	2	2	3	5	4	2	6	3	5	2	4	6	3	4	6	2	4	3	2
499	0	2	1	1	1	可能是豆类食品	1	3	0	0	0	0	1	1	2	1	2	1	2	1	5	4	7	6	1	5	4	4	3	7	4	4	5	5	4	3	2
500	0	2	0	1	3	与肉有相同的口感和味道	1	2	0	0	0	0	1	1	2	3	1	1	1	1	6	3	4	5	2	4	3	3	6	5	4	5	3	5	4	3	2
501	0	2	0	4	1	面食制品	1	3	0	0	0	0	1	2	1	1	1	2	2	2	5	7	7	4	4	5	4	4	3	3	5	4	4	4	5	3	2
502	0	2	1	1	1	植物蛋白	3	2	0	0	0	0	1	1	2	2	2	1	2	1	6	5	3	4	4	7	1	2	6	6	5	5	4	7	4	7	2
503	0	2	1	1	3	为不吃肉类的人提供	1	2	0	0	0	0	1	1	2	1	1	1	1	1	6	2	3	6	2	6	2	3	6	5	6	7	5	6	5	7	3
504	0	2	1	2	3	味道应该很不错吧	2	1	0	0	0	0	1	1	1	1	1	1	1	2	7	4	7	7	2	7	1	1	7	7	7	7	7	7	7	7	2
505	0	2	1	1	1	火腿，培根	1	1	0	0	0	0	1	1	2	1	2	1	1	1	4	5	6	4	2	5	4	5	3	6	5	4	6	7	5	6	2
506	0	2	1	1	3	豆腐	1	3	0	0	0	0	1	1	2	1	2	2	2	1	5	6	7	6	4	6	3	5	4	6	6	5	7	6	5	7	4
507	0	2	1	1	1	无	1	1	0	0	0	0	1	2	2	1	1	2	1	1	5	5	7	6	5	3	6	2	2	5	6	6	6	7	7	7	2
508	0	2	1	1	1	素肉，辣条	1	3	0	0	0	0	1	1	2	1	1	1	2	1	2	5	5	2	2	4	5	3	3	4	5	5	6	5	6	6	2
509	0	2	0	2	1	健康，代替了肉的口感，更美味。	3	1	0	0	0	0	2	1	2	2	1	1	2	1	7	2	6	7	1	6	1	5	3	4	7	3	2	6	4	5	2
510	0	2	1	2	3	替代	1	3	0	0	0	0	1	1	2	2	2	2	2	1	5	6	7	6	3	6	4	2	1	6	7	7	7	7	7	7	3
511	0	2	1	1	1	主要原料有大豆	1	3	0	0	0	0	3	1	2	1	2	2	1	2	4	3	6	6	2	6	3	1	7	6	6	6	5	7	6	4	2
512	0	2	1	1	2	也挺像肉的	1	3	0	0	0	0	2	1	2	3	2	2	1	3	4	3	5	4	3	4	6	4	5	3	5	3	6	4	2	5	2
513	0	2	1	1	1	豆制品	1	3	0	0	0	0	1	1	1	1	1	2	1	1	5	6	7	5	6	3	4	2	5	6	7	6	7	6	7	6	2
514	0	2	0	1	1	合成肉	1	3	0	0	0	0	1	1	2	1	1	2	2	2	5	4	2	5	4	5	4	4	5	4	5	4	5	6	6	4	2
515	0	2	1	3	2	无	2	1	0	0	0	0	2	1	3	1	1	2	1	2	4	5	5	6	7	6	5	4	5	6	4	5	6	5	4	3	3
516	0	2	1	2	1	感觉还不错	1	3	0	0	0	0	1	1	1	1	1	2	1	2	5	6	6	4	3	5	6	4	2	3	6	6	6	6	6	7	1
517	0	2	1	2	3	豆类制品	1	3	0	0	0	0	1	1	2	1	1	1	2	1	4	3	7	4	4	5	3	2	4	5	6	6	4	5	6	5	2
518	0	2	1	1	1	素肉	1	3	0	0	0	0	1	1	2	1	2	1	1	1	4	5	6	5	3	4	3	4	3	4	5	4	4	6	5	4	2
519	0	2	1	2	1	植物肉	1	1	0	0	0	0	2	1	2	1	1	1	1	1	6	3	7	6	2	6	3	2	6	7	6	7	7	6	7	7	3
520	0	2	1	2	3	魔芋或豆腐蛋白	1	3	0	0	0	0	1	1	2	2	2	1	2	1	6	4	6	6	3	6	4	4	2	6	7	7	6	6	7	6	2
521	0	2	1	1	1	有蛋白质的食物	1	1	0	0	0	0	1	1	2	1	1	1	2	2	7	5	3	6	1	5	4	3	5	6	7	7	6	6	7	5	3
522	0	2	0	1	1	素肉	1	2	0	0	0	0	1	1	1	1	3	3	1	1	4	5	4	4	5	4	3	6	2	5	3	5	6	7	4	6	1
523	0	2	0	1	1	人造肉	1	2	0	0	0	0	1	1	1	1	1	3	1	3	3	7	6	2	4	6	4	3	1	4	7	7	7	6	4	3	3
524	0	2	0	1	1	大豆蛋白	1	1	0	0	0	0	2	1	2	1	1	2	1	1	5	4	4	3	4	6	3	3	2	2	4	3	3	3	5	4	2
525	0	2	1	2	1	魔芋，豆皮，淀粉	1	3	0	0	0	0	1	1	1	1	1	1	2	1	5	3	5	6	2	6	1	4	3	6	5	6	5	6	6	5	2
526	0	2	0	1	1	还可以	1	3	0	0	0	0	1	1	2	1	2	2	2	3	4	5	2	5	5	5	5	4	2	4	5	6	6	5	5	6	2
527	0	2	0	1	2	拥有肉味的素食食物	3	1	0	0	0	0	1	2	2	2	1	2	2	1	6	4	5	5	3	6	6	4	3	6	4	3	4	6	4	5	2
528	0	2	1	2	2	人工肉	3	2	0	0	0	0	1	1	2	2	2	2	1	1	6	4	6	6	3	6	4	3	3	6	5	5	6	6	7	5	2
529	0	2	1	1	3	肉类替代品的材料会是蔬菜做的吗？	3	3	0	0	0	0	1	1	2	1	1	1	1	1	6	3	2	6	1	6	2	2	4	6	6	5	5	6	5	6	2
530	0	2	1	2	2	死猪不怕开水烫	1	3	0	0	0	0	2	2	2	1	1	1	2	2	3	3	2	2	3	3	3	4	2	5	2	4	3	4	4	4	2
531	0	2	1	2	3	代餐	2	3	0	0	0	0	2	1	1	2	2	3	2	2	2	3	5	7	6	2	1	3	5	7	4	2	4	6	3	2	2
532	0	2	1	1	3	新奇	3	3	0	0	0	0	1	1	2	1	1	1	2	1	3	3	5	5	4	5	2	6	2	5	6	6	6	6	7	6	2
533	0	2	1	1	1	蛋白质	1	1	0	0	0	0	1	1	1	2	1	2	1	1	7	4	5	5	1	6	3	5	3	5	6	5	5	7	6	7	2
534	0	2	1	1	1	菌类、淀粉类做成类似肉的口感与味道的食物	1	2	0	0	0	0	1	1	2	1	1	3	3	1	6	4	7	6	2	5	1	4	6	5	3	2	4	5	4	5	3
535	0	2	0	1	2	无	1	3	0	0	0	0	1	1	1	3	1	2	2	3	6	5	7	4	4	5	3	4	3	5	5	6	5	6	5	5	2
536	0	2	1	1	1	由大豆、小麦等植物制成	1	3	0	0	0	0	1	1	2	2	2	2	1	3	6	4	7	7	3	4	6	6	2	5	7	6	5	5	6	5	2
537	0	2	0	1	3	不可思议	3	1	0	0	0	0	1	1	2	1	2	3	2	3	5	4	7	7	1	5	3	5	4	7	7	6	1	1	5	1	2
538	0	2	1	1	3	植物蛋白	1	3	0	0	0	0	2	1	2	1	1	1	1	1	7	3	5	6	3	7	3	4	2	6	5	5	7	6	6	7	2
539	0	2	0	1	1	我觉得肉类替代品一般都是各种植物蛋白合成的	1	3	0	0	0	0	2	1	2	1	2	1	2	1	6	5	3	6	2	6	3	2	5	4	5	5	4	6	4	5	2
540	0	2	0	1	3	素肉	1	1	0	0	0	0	2	1	2	1	1	1	1	1	4	4	6	7	2	4	2	6	4	7	4	3	3	5	5	4	2
541	0	2	0	1	1	人造的食物	1	1	0	0	0	0	1	1	2	2	2	2	2	1	5	3	4	6	2	5	2	4	4	6	5	5	6	6	6	5	3
542	0	2	0	1	3	大豆制品	3	3	0	0	0	0	1	1	2	2	1	1	2	1	7	4	4	5	5	6	5	7	4	4	7	7	5	5	5	5	2
543	0	2	1	1	1	味道鲜美	1	1	0	0	0	0	1	3	2	1	1	3	2	1	5	3	3	6	2	6	2	4	5	6	6	6	6	6	6	6	3
544	0	2	0	1	1	meat	3	1	0	0	0	0	2	1	2	1	1	1	2	1	5	3	5	6	4	5	2	2	5	5	6	4	5	7	7	5	4
545	0	2	0	1	1	合成肉，便宜，口感还可以，性价比高	1	3	0	0	0	0	2	1	2	2	2	1	1	1	5	4	4	6	2	5	4	3	5	6	3	3	5	6	4	7	3
546	0	2	0	1	1	大豆肉	1	3	0	0	0	0	1	1	2	2	1	2	1	1	5	4	4	5	4	5	4	4	5	5	5	5	5	5	5	5	2
547	0	2	0	1	1	弹爽	1	2	0	0	0	0	1	1	2	2	2	2	1	1	6	5	7	6	2	5	4	2	5	4	6	6	5	5	6	5	1
548	0	2	0	1	1	岁岁有 猪	3	2	0	0	0	0	3	3	3	3	3	3	3	3	5	5	5	5	4	4	4	4	4	4	6	6	6	6	6	6	2
549	0	2	0	1	1	生不可恋	3	1	0	0	0	0	1	1	2	3	1	2	2	3	5	7	7	7	1	6	5	4	4	6	7	7	6	6	6	6	3
550	0	2	0	1	1	豆类制品	1	3	0	0	0	0	1	1	2	2	1	2	1	3	6	3	4	6	3	6	2	4	4	5	4	5	3	4	5	4	2
551	0	2	0	2	2	火腿	3	1	0	0	0	0	1	1	1	3	1	3	1	3	3	4	5	6	4	4	3	4	3	5	4	6	4	5	5	5	2
552	0	2	0	1	1	不是真的肉	1	1	0	0	0	0	3	1	2	2	1	2	1	1	6	5	6	7	3	6	4	4	3	4	4	4	2	2	4	2	2
553	0	2	0	1	1	素肉	1	3	0	0	0	0	2	1	2	2	2	1	1	1	6	2	6	6	1	6	2	2	5	7	5	4	5	5	4	6	3
554	0	2	0	1	1	人造肉	3	3	0	0	0	0	2	1	2	1	2	1	1	1	4	6	3	7	4	2	7	4	3	5	6	3	5	6	4	4	2
555	0	2	0	1	1	植物肉	1	2	0	0	0	0	1	1	1	2	1	2	2	1	6	4	6	2	3	3	2	4	6	6	7	7	7	7	7	6	2
556	0	2	0	1	1	奶制品	1	3	0	0	0	0	2	1	2	1	2	1	1	1	6	2	5	5	1	6	2	4	3	5	5	5	4	4	6	6	2
557	0	2	1	1	1	大豆蛋白	1	2	0	0	0	0	1	1	2	3	2	1	1	3	5	4	6	6	4	5	3	5	6	5	5	6	7	6	5	6	2
558	0	2	0	1	4	素食	1	1	0	0	0	0	1	1	2	2	2	2	1	1	6	3	2	7	2	7	1	6	4	3	2	1	1	2	4	3	4
559	0	2	0	1	2	感觉全是添加剂	1	3	0	0	0	0	1	1	2	3	1	2	2	3	6	2	7	7	2	7	1	5	3	6	5	3	6	4	4	6	2
560	0	2	1	1	3	植物肉	1	3	0	0	0	0	3	1	2	1	3	1	1	2	5	1	6	7	2	6	3	7	1	5	5	6	7	6	7	5	4
561	0	2	1	1	1	减肥的人所吃的	3	3	0	0	0	0	1	1	2	3	2	2	1	3	3	6	5	4	3	5	4	2	5	5	4	3	3	4	2	2	1
562	0	2	0	1	1	无	1	3	0	0	0	0	2	1	2	1	2	1	1	1	5	5	4	3	5	4	4	3	4	5	6	5	4	5	5	4	1
563	0	2	0	4	2	鸡蛋很少吃肉s	1	1	0	0	0	0	3	3	3	3	3	3	3	3	5	3	7	1	4	6	4	2	5	2	4	4	2	4	2	5	1
564	0	2	0	1	3	能代替肉的食品	2	3	0	0	0	0	2	1	2	3	1	3	2	1	5	6	7	4	3	6	3	4	3	6	6	6	6	5	7	4	1
565	0	2	1	1	1	好吃不胖	1	3	0	0	0	0	2	2	1	2	2	3	1	1	7	3	6	4	2	6	5	3	1	2	6	7	5	6	7	3	2
566	0	2	0	1	1	香肠	1	3	0	0	0	0	1	1	2	2	1	2	1	1	5	2	5	5	1	6	2	2	5	6	5	5	5	5	6	6	2
567	0	2	0	1	1	无	1	1	0	0	0	0	1	2	2	1	2	1	1	1	4	2	4	1	3	4	3	5	1	5	2	3	6	3	5	2	2
568	0	2	0	1	3	会长肉吗	1	3	0	0	0	0	1	1	2	2	2	1	3	3	4	2	6	4	2	6	2	2	3	4	6	6	7	6	4	7	3
569	0	2	0	1	2	鸡排	1	1	0	0	0	0	1	1	2	1	2	3	3	3	5	6	6	4	2	5	4	2	2	4	4	3	5	5	5	3	3
570	0	2	0	1	1	蛋白质丰富的食物	3	1	0	0	0	0	3	3	3	1	3	3	1	3	4	6	6	6	4	6	4	4	4	6	2	2	2	6	6	4	4
571	0	2	0	1	1	豆制品合成，植物肉	1	1	0	0	0	0	3	1	2	2	1	2	2	1	7	4	5	7	2	6	2	4	6	7	4	3	4	4	5	6	2
572	0	2	0	1	1	可以替代肉中的营养	1	3	0	0	0	0	2	1	2	2	1	1	1	1	6	5	4	5	2	5	2	3	5	5	6	5	6	6	5	6	3
573	0	2	0	1	1	豆制品	1	1	0	0	0	0	1	1	2	2	2	2	1	1	7	5	3	7	1	7	1	5	6	7	3	2	1	6	3	3	3
574	0	2	0	1	1	轻食	3	3	0	0	0	0	1	2	2	2	1	2	2	2	6	5	5	6	5	4	6	4	6	5	4	6	5	4	6	5	2
575	0	2	0	2	1	素牛排	1	1	0	0	0	0	1	1	2	1	2	2	2	1	5	7	7	7	1	5	1	6	1	6	7	7	7	7	7	7	2
576	1	1	0	1	3	与肉类含有同样营养物质的科技与狠活。	1	3	1	2	0	0	1	2	1	1	2	2	2	1	3	6	4	4	3	6	2	4	5	4	3	2	3	2	1	3	2
577	1	1	0	2	1	鱼	3	2	1	2	0	0	2	2	1	2	1	3	1	2	6	5	5	6	7	7	6	5	5	6	7	7	6	6	6	6	2
578	1	1	1	1	1	减肥	1	2	1	2	0	0	1	2	2	3	1	2	1	1	5	2	6	7	3	6	2	4	1	6	7	6	5	7	7	6	3
579	1	1	1	1	1	素肉 豆腐	1	3	1	1	1	2	1	2	2	2	1	2	1	1	5	6	4	7	3	5	2	6	2	7	6	4	3	6	5	7	3
580	1	1	1	1	3	替代品比不上真实肉类	1	3	1	3	1	2	1	2	2	2	2	2	2	1	3	7	7	4	4	3	6	5	2	4	4	5	5	7	6	4	2
581	1	1	1	1	3	减肥	3	2	1	2	0	0	1	2	2	3	1	3	2	1	4	5	6	5	4	6	6	5	2	4	5	4	3	7	5	3	2
582	1	1	1	1	2	不好吃	1	2	1	2	0	0	1	3	2	3	3	2	1	1	1	5	6	4	3	4	7	4	2	5	6	4	3	5	6	5	2
583	1	1	1	1	1	健康	1	3	1	1	1	2	2	2	1	2	1	2	2	1	5	6	4	6	7	5	3	4	4	6	6	5	6	5	4	5	2
584	1	1	1	1	1	豆制品辣条	1	1	1	3	1	2	1	2	1	2	1	1	2	2	4	5	4	7	2	5	4	4	4	5	5	5	4	6	6	7	2
585	1	1	1	2	1	大豆蛋白	1	3	1	2	0	0	1	3	2	2	1	2	3	1	5	4	6	5	4	6	3	6	3	5	6	5	7	7	6	5	3
586	1	1	0	1	1	好吃	1	1	1	2	0	0	2	2	2	1	1	2	2	1	6	2	1	6	4	7	2	1	3	4	7	6	2	4	1	6	3
587	1	1	1	1	3	科技	1	2	1	2	0	0	1	2	1	2	2	2	1	1	5	6	4	7	3	5	4	3	7	6	4	3	3	1	4	3	3
588	1	1	1	1	3	植物肉	1	1	1	2	0	0	1	2	1	2	1	2	2	1	2	5	6	7	2	5	3	4	5	6	6	5	6	7	4	5	3
589	1	1	1	1	3	用素食做出像肉口感一样的制品	2	3	1	3	1	2	1	2	1	2	2	2	3	1	7	3	4	6	3	6	3	4	5	6	4	4	5	4	4	5	2
590	1	1	1	1	1	植物肉	1	1	1	2	0	0	1	3	2	2	1	3	3	2	7	1	5	7	2	7	1	6	2	7	6	5	6	7	5	6	4
591	1	1	1	1	2	不真实	1	3	1	3	1	2	1	2	3	2	1	3	2	1	6	4	7	5	2	5	4	4	2	5	6	4	6	6	5	6	2
592	1	1	1	1	1	牛肉	2	2	1	3	1	2	1	2	1	1	2	1	2	1	4	5	5	5	3	5	3	4	4	3	5	5	4	5	4	3	2
593	1	1	0	1	2	还好	3	3	1	3	1	2	1	1	2	2	2	2	2	1	5	3	5	7	3	5	3	1	5	7	5	5	7	7	7	4	2
594	1	1	1	1	1	人造肉	1	2	1	2	0	0	1	2	2	2	1	1	1	2	5	5	4	6	6	5	5	4	7	4	5	5	3	7	6	4	4
595	1	1	1	1	1	好吃	1	3	1	3	1	2	1	2	1	2	1	1	2	2	6	2	7	7	4	7	2	6	2	4	7	7	7	6	4	4	3
596	1	1	1	1	1	不是肉 但口感 味道等方面和肉很像	3	3	1	2	0	0	1	3	2	3	2	2	2	1	6	3	5	7	3	5	4	4	5	6	5	6	5	5	6	7	1
597	1	1	1	1	1	素鸡	1	3	1	2	0	0	1	2	3	3	3	2	1	1	2	5	3	6	1	2	6	3	6	4	6	3	5	2	7	3	2
598	1	1	1	2	2	没有	3	2	1	2	0	0	3	2	3	2	2	3	2	2	5	3	4	4	5	4	5	4	6	5	4	3	4	5	4	5	3
599	1	1	1	1	1	植物肉	1	3	1	2	0	0	2	1	2	3	1	2	2	3	7	2	4	5	2	7	3	4	4	6	5	4	5	7	6	4	3
600	1	1	1	1	3	代餐	1	3	1	3	1	2	1	2	1	2	1	2	2	1	4	5	6	7	2	5	4	6	2	5	5	6	5	4	5	6	2
601	1	1	0	1	2	鱼豆腐，	1	3	1	2	0	0	1	2	1	2	2	1	2	2	3	2	6	6	5	5	4	5	6	5	5	5	4	5	5	4	2
602	1	1	1	1	3	丸子	3	3	1	3	1	2	1	1	1	1	1	1	1	1	7	4	4	6	2	6	4	4	1	5	7	6	5	7	2	6	1
603	1	1	0	1	3	素肉	3	2	1	2	0	0	1	3	2	3	2	3	3	1	5	6	5	6	2	6	4	5	1	5	5	5	5	6	6	6	2
604	1	1	1	1	1	鸡排，培根	1	3	1	3	1	2	1	2	2	2	2	2	2	1	2	7	6	2	2	5	6	4	4	6	6	5	7	5	6	5	3
605	1	1	1	2	2	恶心	1	3	1	2	0	0	1	3	3	3	3	3	3	3	5	4	6	5	5	5	7	6	1	3	4	5	6	7	5	6	2
606	1	1	0	1	2	大豆制品	1	2	1	1	1	3	2	2	1	1	2	1	2	1	7	4	6	5	3	6	3	4	4	7	5	4	6	4	7	5	3
607	1	1	1	1	1	植物肉	1	3	1	2	0	0	1	2	2	2	2	2	2	1	6	3	4	7	2	6	2	4	5	6	6	5	6	6	6	6	2
608	1	1	1	1	1	豆制品	1	2	1	2	0	0	1	2	1	2	2	1	1	1	3	6	7	4	4	3	5	5	2	6	5	5	4	3	5	6	2
609	1	1	0	1	1	不卫生	3	2	1	2	0	0	2	1	3	2	2	1	1	2	5	6	7	4	3	5	3	5	2	6	5	2	3	5	3	6	2
610	1	1	1	1	1	豆制品	1	3	1	2	0	0	1	2	3	2	3	3	2	1	5	6	7	4	3	4	5	4	6	6	5	3	5	6	6	6	3
611	1	1	1	1	1	素肉	1	3	1	3	1	2	1	2	1	2	1	2	2	1	5	4	6	6	3	5	5	4	5	6	6	7	5	6	7	5	2
612	1	1	0	1	1	人造火腿	1	1	1	3	1	2	1	3	2	2	3	2	1	1	6	4	5	7	3	6	2	3	5	7	7	7	6	6	7	7	4
613	1	1	1	1	1	人造肉，豆子做的口感像肉	1	2	1	3	1	2	1	1	2	2	2	2	2	1	5	4	5	6	4	5	3	4	3	5	5	6	7	6	6	5	4
614	1	1	1	1	3	植物肉	1	3	1	2	0	0	1	2	2	2	2	2	1	1	4	5	7	5	2	5	4	6	2	5	6	6	7	5	7	7	3
615	1	1	1	1	1	素食牛肉	1	3	1	2	0	0	1	2	2	2	1	2	2	1	5	7	3	7	1	6	4	4	1	7	5	4	4	5	3	4	3
616	1	1	1	1	4	没有	1	3	1	3	1	2	1	2	3	2	1	3	2	3	4	5	4	5	3	3	4	4	5	4	4	4	5	4	5	4	1
617	1	1	1	1	1	蛋白肉	1	1	1	2	0	0	1	2	1	1	1	1	1	2	7	2	3	5	6	6	4	5	2	6	7	5	7	5	7	5	2
618	1	1	0	1	1	口感一致且便宜	1	3	1	2	0	0	1	3	2	3	3	3	2	1	4	6	7	5	3	6	3	5	4	7	6	5	7	5	6	7	3
619	1	1	1	1	2	豆腐	1	3	1	2	0	0	1	2	2	2	3	2	2	1	6	4	5	5	3	5	4	6	5	5	5	4	4	5	6	5	2
620	1	1	1	1	3	蘑菇	1	3	1	2	0	0	1	2	1	1	1	2	2	1	5	3	7	3	2	6	1	1	5	4	4	3	3	5	4	4	1
621	1	1	1	1	1	以前买过的一块钱的人造肉零食（就是类似于豆干那种包装）	1	2	1	3	1	1	1	2	1	2	1	1	2	1	5	4	6	7	3	6	3	5	6	7	5	5	5	4	6	6	2
622	1	1	1	1	1	鱼	1	3	1	2	0	0	1	3	2	3	1	3	2	1	5	4	7	6	3	5	4	6	5	6	4	5	5	3	4	3	3
623	1	1	0	1	1	有没有和肉类同样的营养价值	2	3	1	2	0	0	2	1	2	3	2	1	2	1	4	7	6	2	5	7	3	4	6	5	5	3	6	3	6	5	2
624	1	1	1	1	1	淀粉肠	1	3	1	2	0	0	1	2	1	1	1	2	2	1	6	4	5	7	3	7	2	4	3	5	4	5	5	6	4	5	2
625	1	1	0	1	1	像	2	2	1	2	0	0	3	3	3	3	3	3	3	3	4	4	4	4	4	4	5	5	5	5	3	3	3	4	5	6	2
626	1	1	1	1	3	素食	2	3	1	2	0	0	1	2	1	2	1	2	2	1	5	5	4	4	4	5	3	7	3	4	5	4	4	5	5	4	1
627	1	1	0	1	3	有肉类味道和营养的食物，但还不是肉	1	3	1	2	0	0	1	2	2	2	2	2	2	1	6	3	5	6	2	5	2	4	6	5	5	6	5	4	5	6	3
628	1	1	0	3	3	香	1	3	1	2	0	0	1	1	3	2	1	2	2	1	3	6	4	5	3	6	3	5	2	4	3	7	5	2	4	3	3
629	1	1	1	1	2	没有	3	1	1	2	0	0	2	3	2	3	3	3	2	1	5	6	6	5	4	5	5	6	4	4	6	7	5	7	6	7	2
630	1	1	1	1	3	味道一般	1	3	1	2	0	0	2	1	3	1	2	2	1	2	4	6	7	2	4	2	3	5	6	4	3	5	7	6	5	6	3
631	1	1	0	1	3	科技 不安全	1	1	1	2	0	0	1	2	2	2	2	2	1	1	6	4	7	4	4	5	4	5	1	4	5	4	5	5	5	4	1
632	1	1	1	1	1	减脂	1	3	1	2	0	0	2	2	2	1	1	1	2	1	6	4	7	7	3	6	4	5	5	6	7	7	7	7	7	7	3
633	1	1	1	1	1	素肉	1	3	1	2	0	0	1	2	1	2	2	1	2	1	4	5	5	4	4	5	5	4	3	3	4	4	5	5	4	3	2
634	1	1	1	1	1	豆类肉制品	3	1	1	1	1	2	1	1	2	1	1	2	1	1	7	2	3	7	1	7	3	3	5	7	7	7	7	7	6	5	3
635	1	1	0	1	1	人造肉 豆制品	1	3	1	2	0	0	2	2	1	1	1	2	2	1	6	5	6	6	2	6	3	3	2	5	6	7	6	6	5	6	3
636	1	1	0	1	1	豆制品素肉	1	1	1	3	1	2	1	2	2	2	1	2	1	1	6	4	4	7	3	6	2	5	5	6	5	6	7	6	7	6	3
637	1	1	0	1	1	用面粉或其他原料做成肉的样式，并利用各种调味料使之拥有肉的口感与气味	1	3	1	2	0	0	1	2	2	2	1	2	1	1	6	5	5	6	3	6	3	2	3	6	6	6	7	7	7	5	3
638	1	1	1	1	2	代食	1	3	1	2	0	0	1	2	2	2	3	2	1	1	6	2	4	7	2	6	4	7	2	6	6	6	6	7	5	7	2
639	1	1	0	1	3	大豆蛋白	1	3	1	3	1	1	2	2	2	1	2	1	2	1	5	6	7	5	3	5	4	4	5	6	7	5	6	7	6	7	3
640	1	1	0	1	1	人工肉	1	1	1	2	0	0	1	1	2	1	2	2	2	1	5	6	6	5	5	7	6	6	5	5	4	6	5	5	4	6	3
641	1	1	1	1	1	素肉 豆腐	1	3	1	2	0	0	1	2	1	2	2	3	3	1	5	4	5	6	2	5	4	5	5	5	4	4	5	5	4	5	3
642	1	1	0	1	1	替代	1	1	1	2	0	0	1	1	1	1	1	2	1	1	5	6	7	6	3	5	6	4	4	5	6	5	6	7	6	6	2
643	1	1	1	1	2	高蛋白	1	3	1	2	0	0	1	2	1	2	2	1	2	2	5	2	3	6	2	6	2	3	5	6	5	5	5	6	6	6	3
644	1	1	1	1	3	用素食代替肉类	1	3	1	3	1	2	2	2	1	1	3	2	2	1	5	6	6	7	2	5	4	5	3	5	5	5	6	6	6	5	2
645	1	1	1	1	1	素肉，豆制品	1	3	1	1	1	2	1	2	2	2	2	2	1	1	4	6	6	4	4	4	5	5	3	5	5	6	5	6	4	6	1
646	1	1	1	1	1	鱼豆腐	1	3	1	2	0	0	1	3	2	3	3	3	1	1	4	5	7	4	2	5	4	2	3	4	6	7	5	6	6	4	2
647	1	1	1	1	3	植物肉	3	3	1	2	0	0	1	2	1	2	2	1	2	2	5	6	6	7	2	6	5	6	2	4	5	5	4	7	4	3	3
648	1	1	1	2	3	人造肉	1	1	1	2	0	0	1	3	2	2	3	2	1	1	5	2	3	6	2	6	3	2	5	5	5	6	6	5	7	5	3
649	1	1	0	1	1	豆制品	1	3	1	2	0	0	1	2	2	2	1	2	1	1	7	4	6	6	6	6	5	4	7	3	5	3	5	7	6	5	2
650	1	1	0	1	1	好吃	1	3	1	3	1	2	1	3	3	3	2	2	1	1	2	6	7	5	3	5	6	4	4	5	6	5	6	7	5	4	3
651	1	1	1	2	1	豆制品	1	1	1	2	0	0	1	1	2	1	2	2	1	2	3	4	5	6	2	4	2	5	1	6	3	4	5	6	7	4	1
652	1	1	1	1	3	淀粉肠	1	1	1	2	0	0	1	1	2	2	1	1	2	2	4	5	6	5	6	5	6	5	6	6	5	6	6	5	6	5	2
653	1	1	0	1	3	植物肉	1	1	1	3	1	1	1	2	2	2	2	1	1	1	4	6	6	5	4	6	3	2	5	5	5	4	5	4	6	4	3
654	1	1	1	1	1	可以，但是没必要吧	1	3	1	2	0	0	1	2	1	1	1	2	2	1	5	4	5	4	4	6	3	5	5	4	4	5	5	6	4	4	2
655	1	1	0	1	3	用人工合成肉类食品里的细胞使其繁殖变成肉	1	1	1	2	0	0	1	2	2	2	2	1	1	2	4	5	7	5	3	5	4	4	3	5	7	6	7	7	6	6	4
656	1	1	1	1	1	豆皮	1	3	1	2	0	0	1	2	2	2	1	2	2	1	6	4	7	6	3	5	6	7	1	4	6	5	4	6	5	4	1
657	1	1	1	1	2	目前想不到	2	3	1	2	0	0	2	1	1	2	2	1	1	2	6	5	4	5	6	4	5	6	4	5	6	4	4	6	5	5	1
658	1	1	0	1	2	我觉得肉类代替品在注明的前提下可以接受，如果不注明就会让我们有反感	1	2	1	2	0	0	1	2	1	2	1	1	2	1	5	4	6	6	3	4	3	5	2	4	6	5	7	7	6	6	2
659	1	1	1	2	1	豆制品类的，有的很多汉堡店都有这种	1	3	1	2	0	0	1	1	2	2	2	2	1	1	5	4	5	6	3	6	3	4	3	6	6	5	6	7	5	6	2
660	1	1	1	1	1	蘑菇肉	3	3	1	2	0	0	1	2	2	2	1	2	1	1	4	5	6	6	2	5	4	3	2	6	6	5	6	6	5	6	1
661	1	1	0	1	1	高科技，绿色	1	1	1	2	0	0	1	2	2	2	3	2	2	1	6	2	3	6	2	5	3	4	4	6	6	5	6	7	5	6	3
662	1	1	1	1	4	豆类	1	1	1	2	0	0	1	2	1	2	2	1	2	2	5	4	6	5	3	6	2	5	2	4	6	6	5	7	5	6	1
663	1	1	1	1	1	豆腐、鸡蛋	1	3	1	2	0	0	1	2	2	2	1	2	2	1	5	6	7	4	3	4	4	7	2	2	7	6	6	7	7	4	2
664	1	1	1	1	1	素肉，面粉	1	3	1	2	0	0	1	2	2	2	1	2	1	1	5	4	5	5	2	6	3	4	3	6	5	5	6	5	5	6	2
665	1	1	1	1	1	完美	3	3	1	2	0	0	2	1	1	2	3	2	2	1	6	5	7	6	3	6	2	1	4	5	6	5	4	5	6	7	2
666	1	1	0	1	1	植物合成肉	1	3	1	2	0	0	1	2	2	2	1	2	2	1	5	4	6	6	2	7	2	1	4	5	5	6	6	7	5	5	3
667	1	1	1	1	1	植物蛋白	1	1	1	2	0	0	1	2	1	2	1	2	2	1	4	5	7	4	3	4	5	6	4	4	4	3	3	4	4	3	2
668	1	1	1	1	3	蛋白粉	2	3	1	2	0	0	1	2	2	2	1	2	1	1	6	4	7	7	4	7	4	4	3	7	7	7	6	5	7	6	2
669	1	1	1	1	4	植物肉	3	3	1	2	0	0	2	2	2	1	1	2	2	3	2	7	3	7	2	6	4	2	6	6	2	2	2	4	2	4	2
670	1	1	1	1	3	罐头，肠	1	2	1	2	0	0	1	3	2	3	1	2	3	1	4	5	7	4	3	5	4	5	3	4	5	5	5	6	7	5	3
671	1	1	1	1	4	假肉	1	3	1	2	0	0	1	2	1	1	2	2	2	2	2	2	2	6	3	6	2	2	1	7	1	1	6	3	3	1	2
672	1	1	1	1	3	素食肉	3	3	1	2	0	0	1	2	2	2	1	1	2	2	7	1	7	7	2	6	3	4	2	4	7	7	7	7	7	6	2
673	1	1	0	3	4	想到是其他肉类就想呕吐	1	2	1	1	1	2	1	3	3	3	3	3	3	3	4	6	7	4	3	5	5	3	3	5	4	4	6	6	2	3	2
674	1	1	0	1	3	减肥，可能是减肥者的热爱，毕竟想吃肉但又对自己的体重有严格要求的人	1	3	1	2	0	0	1	2	1	2	2	2	2	1	5	4	4	6	1	7	2	1	6	5	4	3	3	6	4	3	2
675	1	1	1	1	3	非肉类	1	1	1	2	0	0	1	2	2	2	3	2	1	1	4	5	6	6	2	5	4	3	5	5	6	6	6	4	6	5	2
676	1	1	1	1	1	豆子	1	3	1	2	0	0	2	2	1	2	3	3	3	3	4	4	6	5	3	5	4	3	5	4	4	5	6	6	5	5	2
677	1	1	1	1	1	富含蛋白质的豆类	1	3	1	2	0	0	1	2	2	2	1	2	1	1	6	2	2	6	1	6	2	2	6	7	5	5	6	5	6	5	4
678	1	1	1	1	1	豆制品，魔芋制品	1	3	1	2	0	0	1	3	2	3	1	2	1	1	4	6	7	4	2	5	4	4	5	6	5	6	7	7	7	6	2
679	1	1	0	1	1	肉罐头，火腿肠	1	3	1	3	1	2	1	1	2	2	1	2	2	1	5	4	3	7	3	6	4	5	7	6	4	6	5	3	4	2	2
680	1	1	1	1	3	大豆	1	1	1	2	0	0	1	2	1	1	1	2	2	1	5	6	4	6	3	4	6	6	2	4	4	4	5	6	5	4	4
681	1	1	0	1	1	人造肉	1	1	1	3	1	2	1	2	1	2	1	1	2	1	4	6	7	6	6	4	4	6	3	4	7	7	5	7	7	3	3
682	1	1	0	4	3	挺好	3	2	1	2	0	0	2	1	2	1	2	2	1	1	6	5	6	5	6	7	6	5	5	6	5	6	5	6	5	6	2
683	1	1	1	1	1	素食主义者、豆腐豆皮	1	2	1	3	1	2	1	1	2	1	2	2	1	1	5	7	7	6	4	5	6	4	5	6	5	4	6	5	7	6	1
684	1	1	1	1	1	豆制品。	1	1	1	2	0	0	1	2	1	2	1	2	2	2	6	3	5	5	3	6	4	4	5	6	5	3	3	5	4	5	2
685	1	1	0	1	1	素鸡	1	1	1	2	0	0	1	2	2	2	1	2	1	1	6	4	4	6	1	5	4	4	5	6	6	6	5	6	5	4	2
686	1	1	1	1	3	香肠	1	3	1	2	0	0	1	2	1	2	2	1	2	2	4	7	6	7	2	5	1	1	6	7	6	7	6	5	7	7	2
687	1	1	0	2	1	豆浆	1	2	1	3	1	2	2	1	2	1	1	2	2	1	6	5	7	6	2	5	7	5	6	6	6	5	7	4	5	6	2
688	1	1	0	1	3	人工合成	1	3	1	1	1	3	1	2	1	1	2	2	1	1	5	4	5	5	4	5	3	3	2	4	5	4	3	5	6	4	2
689	1	1	1	1	1	多种植物蛋白	1	3	1	3	1	2	1	3	2	2	3	3	2	1	3	5	5	2	4	6	5	3	6	4	5	6	6	4	7	6	1
690	1	1	1	1	3	可以完全替代肉类吗?	3	3	1	2	0	0	1	2	2	2	1	2	1	1	5	6	4	3	5	6	4	4	4	4	5	6	5	7	5	5	3
691	1	1	1	1	2	素肉；就是用魔芋丝和豆腐做成的口感类似于肉质的素食	1	3	1	2	0	0	1	2	2	2	2	2	1	1	7	4	5	7	3	6	2	3	6	7	6	7	6	7	7	6	3
692	1	1	1	1	3	高科技产品	1	3	1	2	0	0	1	2	2	2	2	2	1	1	3	6	6	5	4	5	4	3	5	4	6	5	6	5	4	5	2
693	1	1	1	1	3	技术提取	3	3	1	2	0	0	1	2	1	1	2	1	2	2	4	6	6	5	2	6	2	6	1	5	4	4	5	6	3	5	2
694	1	1	1	1	3	鸡蛋	3	3	1	2	0	0	1	3	2	2	3	2	3	2	5	4	5	4	2	6	2	2	4	4	5	5	4	5	4	4	2
695	1	1	1	1	3	不健康	1	3	1	2	0	0	1	2	2	2	1	2	2	1	5	4	6	6	3	5	4	5	4	5	6	4	5	5	5	5	2
696	1	1	0	1	3	素食罐头	3	3	1	2	0	0	1	2	1	2	1	1	2	3	5	6	6	4	4	7	2	4	6	5	4	5	3	4	5	6	2
697	1	1	1	1	3	减脂	3	1	1	3	1	2	1	1	1	1	2	2	1	1	5	4	7	7	2	7	2	4	6	6	6	6	6	4	5	4	3
698	1	1	0	1	1	素鸡	1	3	1	3	1	1	1	2	1	2	2	1	2	1	7	5	6	7	3	6	3	4	3	4	4	4	4	5	6	4	3
699	1	1	0	1	1	烤肉	1	3	1	3	1	3	1	2	1	2	2	1	2	2	5	5	5	5	6	6	6	6	4	5	6	5	4	5	6	5	2
700	1	1	0	1	1	素鱼籽	1	3	1	2	0	0	1	2	2	2	1	2	1	1	6	4	5	7	3	6	2	4	3	6	6	7	5	7	6	7	2
701	1	1	1	2	1	寺庙仿荤素斋	1	1	1	2	0	0	1	2	1	2	1	2	2	3	7	3	2	7	1	7	1	1	7	6	1	1	2	1	2	3	3
702	1	1	1	2	1	人造肉，爱护小动物	3	1	1	2	0	0	1	2	2	1	1	2	2	1	4	6	6	3	4	4	6	4	3	3	6	4	4	6	4	5	2
703	1	1	0	1	1	火腿肠	1	1	1	3	1	2	1	1	2	2	3	2	1	3	5	6	7	4	4	3	3	2	4	4	5	4	5	4	5	4	2
704	1	1	0	1	3	合成肉	1	3	1	3	1	2	1	2	1	1	2	1	1	1	5	4	2	7	4	6	3	3	3	7	7	7	6	6	4	5	3
705	1	1	1	1	3	代替肉类的食物，不是肉类但在口感、营养方面应该是类似于肉类，可以代替人体对于肉类食品的需求	3	1	1	1	1	2	1	1	2	2	2	2	1	1	5	4	7	5	4	5	4	3	3	1	6	4	3	3	6	4	2
706	1	1	0	1	2	人造肉	2	1	1	2	0	0	1	2	3	2	3	3	2	1	5	4	7	6	4	6	6	4	5	4	7	6	6	6	7	7	2
707	1	1	1	1	1	豆制品，素肉，植物肉	3	2	1	2	0	0	1	2	2	2	1	2	1	1	7	5	5	7	2	4	2	1	5	6	7	6	5	4	5	6	3
708	1	1	1	1	3	假肉	3	3	1	3	1	1	1	2	1	2	3	3	2	2	4	5	5	7	4	5	4	6	3	5	5	7	7	5	5	4	3
709	1	1	1	1	1	合成肉	1	3	1	2	0	0	1	3	2	1	2	1	1	1	3	6	5	3	4	6	6	6	2	5	3	5	5	6	6	6	2
710	1	1	0	1	3	人造肉、植物肉饺子	1	1	1	2	0	0	3	2	3	2	3	1	2	2	5	4	6	6	2	6	3	3	5	6	7	6	5	6	4	6	2
711	1	1	1	1	2	饱腹，但没有吃肉类时的满足感。	2	3	1	3	1	2	1	3	2	2	2	2	2	1	4	6	6	5	2	5	3	5	1	6	5	4	4	6	4	5	2
712	1	1	1	1	1	味道十分相似，口感也很不错	1	3	1	2	0	0	1	2	1	2	2	2	2	1	6	4	6	4	2	4	3	4	2	4	4	3	5	4	4	5	2
713	1	1	1	1	1	轻食	1	3	1	2	0	0	1	3	2	3	1	3	2	1	5	4	4	6	3	5	3	4	2	6	6	6	6	7	5	5	2
714	1	1	0	1	1	经济实惠	1	3	1	1	1	2	1	2	1	2	1	2	3	1	3	5	6	4	3	2	5	4	3	4	4	5	3	6	5	4	2
715	1	1	1	2	4	无法完全替代	1	2	1	2	0	0	1	2	1	2	1	2	2	1	6	4	5	6	3	5	4	7	1	5	5	5	6	6	6	6	2
716	1	1	1	3	2	豆制品	3	3	1	2	0	0	1	2	2	1	1	2	2	1	4	3	3	5	4	4	6	5	4	4	4	3	5	4	4	6	4
717	1	1	0	1	3	植物蛋白	1	1	1	2	0	0	1	2	1	2	3	2	2	1	4	4	5	5	3	5	3	3	5	4	4	4	5	5	4	4	3
718	1	1	1	1	3	素肉	2	2	1	2	0	0	2	2	1	2	1	1	1	2	5	4	4	3	5	4	3	4	4	3	5	4	3	5	4	3	2
719	1	1	1	1	2	合成肉	1	3	1	3	1	2	1	2	3	2	3	1	3	3	5	6	3	7	2	5	3	5	6	6	4	5	4	4	4	5	2
720	1	1	1	1	1	素肉、大豆制品	1	3	1	2	0	0	1	2	1	2	1	2	2	1	6	4	5	6	3	5	3	4	5	5	6	6	6	5	5	5	3
721	1	1	1	1	3	人工肉类	3	3	1	2	0	0	1	2	1	1	2	2	2	1	7	3	2	6	3	5	3	2	3	6	5	5	3	5	4	5	2
722	1	1	0	1	3	植物肉	1	3	1	2	0	0	1	1	2	1	1	2	1	1	6	4	7	5	3	3	5	4	6	5	3	2	2	6	5	6	2
723	1	1	0	1	1	素食主义者	1	1	1	2	0	0	1	2	2	2	1	2	2	1	5	4	7	6	5	6	5	5	3	6	6	5	4	5	5	5	3
724	1	1	0	1	1	大豆制品	1	3	1	1	1	2	1	3	3	2	2	3	2	3	5	4	7	5	2	6	3	5	4	6	7	6	6	5	4	5	2
725	1	1	0	1	1	Real	1	2	1	2	0	0	1	1	2	1	2	1	2	1	5	4	5	4	5	4	4	6	3	6	5	4	6	5	6	5	2
726	1	1	0	1	2	合成肉	1	2	1	2	0	0	1	2	2	1	1	2	2	1	5	4	6	7	2	6	6	4	4	6	5	4	5	6	6	5	3
727	1	1	0	1	1	素肉	1	3	1	2	0	0	1	3	1	2	1	2	1	2	2	6	4	6	2	4	1	3	4	6	1	5	6	3	3	5	2
728	1	1	1	1	1	没有什么	1	3	1	2	0	0	1	1	1	1	1	1	1	1	4	7	3	6	2	6	7	3	1	6	4	4	5	7	5	5	1
729	1	1	1	1	2	不好吃	2	3	1	3	1	2	1	2	1	2	2	1	2	2	4	5	6	4	3	4	3	3	2	4	4	5	6	6	5	5	1
730	1	1	1	2	1	有肉味的，仿肉味的素食品	1	3	1	2	0	0	1	2	1	1	1	3	2	1	6	4	6	2	4	6	2	7	4	6	5	6	5	7	5	4	3
731	1	1	1	1	1	素牛排	1	2	1	1	1	2	1	2	2	1	1	2	2	2	6	4	7	5	3	5	4	3	3	5	5	5	5	6	6	5	3
732	1	1	1	1	3	素肉 豆制品	1	3	1	2	0	0	1	2	3	2	1	2	3	1	3	5	6	3	4	5	2	4	5	3	4	4	5	6	4	5	2
733	1	1	0	1	3	想到了压缩饼干 因为它在我眼里是一种实物的替代品	3	3	1	1	1	2	1	1	2	2	2	2	2	1	6	2	6	6	2	5	2	1	7	5	5	6	4	4	5	5	3
734	1	1	0	2	2	肉有腥味	1	3	1	2	0	0	2	1	3	1	3	2	2	1	6	4	2	6	5	4	2	6	3	7	6	2	6	3	5	7	2
735	1	1	1	1	3	关晓彤推荐植物肉	3	2	1	2	0	0	1	2	1	1	2	2	2	1	6	5	7	6	2	5	3	1	6	5	4	2	3	4	3	4	3
736	1	1	1	1	1	好吃	1	1	1	2	0	0	1	3	2	3	2	3	2	1	5	6	6	7	2	6	3	6	3	7	3	5	5	6	6	7	2
737	1	1	1	1	1	蛋白质	2	1	1	2	0	0	1	2	2	2	1	2	1	1	5	4	6	7	4	5	3	2	4	5	6	5	5	4	5	5	2
738	1	1	0	1	1	素肉	1	3	1	2	0	0	1	2	1	1	2	1	2	1	5	4	6	5	3	4	4	3	2	5	5	4	5	5	6	5	3
739	1	1	1	3	2	没有肉好吃，	1	2	1	1	1	1	1	1	3	2	1	2	2	1	4	5	5	4	3	4	4	3	2	5	4	5	6	5	7	5	2
740	1	1	0	1	2	不清楚	1	1	1	3	1	1	1	1	1	1	1	1	1	1	3	6	4	4	6	4	5	7	2	4	7	7	7	6	7	5	1
741	1	1	1	1	3	素肉	1	3	1	2	0	0	1	2	3	3	2	3	2	1	5	4	6	6	2	6	3	4	5	5	5	5	5	5	6	6	3
742	1	1	1	1	3	替换	3	3	1	2	0	0	1	2	1	2	1	1	2	2	4	6	2	4	4	4	6	5	4	2	7	6	5	6	7	5	2
743	1	1	1	1	3	植物肉	1	3	1	3	1	2	1	2	2	3	2	3	1	1	5	6	5	7	2	5	4	2	4	7	5	4	6	7	5	6	2
744	1	1	1	1	3	高蛋白	1	1	1	2	0	0	1	2	1	2	1	2	1	1	6	4	6	4	7	6	4	6	1	4	7	5	6	7	7	3	2
745	1	1	0	1	1	口感很像	1	2	1	2	0	0	1	2	1	2	1	1	2	2	5	5	7	4	4	4	5	7	2	3	6	6	6	5	7	6	3
746	1	1	0	1	4	素食	1	1	1	2	0	0	1	2	1	2	2	1	2	2	3	5	6	4	3	5	3	4	2	2	4	4	3	5	4	5	2
747	1	1	1	1	1	鱼	2	1	1	3	1	1	1	2	1	2	1	1	2	2	4	4	2	4	2	5	1	2	4	4	4	4	4	4	4	4	2
748	1	1	0	2	1	素肉	3	3	1	2	0	0	1	2	1	2	1	2	2	2	5	5	4	5	5	5	4	2	1	1	4	3	2	3	2	1	2
749	1	1	0	1	1	茄子	1	1	1	2	0	0	1	3	2	2	3	2	1	2	5	5	4	6	3	4	4	6	3	5	7	5	5	6	5	5	2
750	1	1	1	1	3	鸡蛋 牛奶	3	2	1	2	0	0	1	2	2	2	2	2	2	1	4	6	7	6	4	7	5	7	3	6	4	1	3	1	7	7	1
751	1	1	1	1	1	用素菜制作成味道，形态像肉食的食物	1	3	1	2	0	0	1	3	2	2	1	3	3	1	5	5	7	5	5	5	6	6	3	4	5	4	5	6	5	4	1
752	1	1	1	4	1	大豆素肉	1	1	1	2	0	0	1	2	1	2	2	1	2	2	5	3	2	5	3	6	2	4	5	6	3	4	4	4	3	4	2
753	1	1	0	1	1	像肉，有肉的口感，但不是肉	1	2	1	3	1	2	1	3	2	2	3	2	3	3	5	4	7	2	6	4	3	7	4	3	7	4	6	3	7	2	3
754	1	1	0	1	3	素牛肉	1	3	1	1	1	2	1	2	2	1	1	2	1	1	7	5	5	6	3	6	4	4	5	6	6	5	4	5	6	6	3
755	1	1	1	1	2	素鸡	1	3	1	2	0	0	1	2	1	3	1	2	2	1	6	4	4	6	2	6	3	4	6	5	5	5	5	6	5	6	3
756	1	1	1	1	1	素肉	1	3	1	2	0	0	1	2	2	2	1	2	1	1	5	3	4	6	3	5	3	5	5	6	6	6	5	6	5	7	2
757	1	1	1	1	3	午餐肉	1	3	1	3	1	2	1	1	1	1	2	2	1	1	6	3	4	5	2	5	4	3	5	6	5	6	5	6	6	7	2
758	1	1	0	1	2	素肉	1	1	1	2	0	0	1	2	1	2	3	3	3	2	5	5	4	4	3	4	5	6	3	3	7	6	2	6	6	5	1
759	1	1	0	1	1	营养问题	1	3	1	3	1	2	1	1	2	1	2	2	1	2	6	4	7	5	3	5	2	1	6	6	6	5	4	4	4	6	2
760	1	1	0	1	1	大豆，豆腐	1	3	1	2	0	0	1	3	2	2	2	3	2	1	7	2	6	5	4	6	3	4	1	5	7	5	4	6	6	5	2
761	1	1	1	1	1	科学合成转基因	1	1	1	2	0	0	1	1	1	2	1	1	2	2	5	4	5	5	3	5	3	4	3	6	6	5	6	5	7	6	3
762	1	1	1	1	2	不安全	1	3	1	2	0	0	1	2	2	2	1	1	2	1	5	4	5	6	4	5	2	4	4	5	5	6	5	6	7	7	2
763	1	1	1	1	3	植物肉	1	3	1	3	1	2	1	3	3	2	3	2	1	1	3	3	5	6	4	3	4	5	4	5	5	4	5	6	7	4	2
764	1	1	1	1	2	不卫生	1	3	1	3	1	2	1	3	2	3	1	3	3	1	6	4	4	5	3	6	4	3	2	5	4	4	4	5	5	4	2
765	1	1	1	1	1	豆腐应该是肉类替代品吧	1	1	1	2	0	0	1	2	1	1	2	2	1	1	4	5	5	6	3	6	3	4	5	7	5	5	6	6	6	5	1
766	1	1	1	1	1	植物肉	1	3	1	2	0	0	1	1	2	1	1	2	2	1	7	2	3	6	2	5	3	4	6	5	3	4	6	4	4	3	2
767	1	1	0	1	1	人造鸡腿，鸡肉	1	3	1	2	0	0	1	2	2	2	1	2	1	1	2	6	7	4	4	5	6	6	3	5	6	7	6	5	6	6	2
768	1	1	1	1	2	糖醋里脊，虽然听起来像是肉做，但实际却只是面粉做的	3	1	1	2	0	0	1	3	2	2	3	2	1	1	4	5	6	6	3	5	2	1	4	4	6	5	5	6	6	7	2
769	1	1	1	1	2	人工肉	3	1	1	2	0	0	1	2	2	2	1	2	2	1	4	5	6	4	3	5	5	4	4	5	4	5	6	3	5	4	2
770	1	1	1	1	1	素肉	3	3	1	3	1	2	1	3	1	3	3	3	2	1	4	4	6	4	4	6	4	4	5	3	4	4	4	4	5	4	2
771	1	1	0	1	1	健康	1	1	1	2	0	0	1	2	1	2	1	1	2	1	7	5	4	5	7	5	7	6	5	7	6	7	4	6	5	7	3
772	1	1	1	1	2	口感类似于肉类	1	2	1	2	0	0	1	3	2	3	3	2	3	1	2	7	6	3	7	2	6	3	4	2	5	6	7	6	7	7	2
773	1	1	1	1	3	豆制品代替，德克士推出的植物肉	1	3	1	2	0	0	1	2	1	2	1	1	2	2	5	4	7	4	3	5	2	2	2	5	6	7	7	5	3	4	3
774	1	1	0	1	1	面筋 蘑菇	3	2	1	3	1	2	1	2	2	2	1	2	1	1	4	5	6	6	2	5	3	2	5	6	5	3	4	2	2	4	2
775	1	1	0	1	1	豆制品，奶制品	1	2	1	2	0	0	1	2	1	2	1	2	1	2	4	4	2	6	2	5	3	2	6	5	6	6	5	6	5	6	2
776	1	1	1	1	1	健康营养	1	1	1	1	1	2	1	2	1	2	1	2	2	1	5	4	4	6	3	5	3	2	4	6	4	3	4	5	5	4	2
777	1	1	1	1	1	素肉辣条	1	3	1	2	0	0	2	1	2	1	2	2	1	1	5	4	7	6	3	6	4	2	4	6	4	3	2	4	3	4	3
778	1	1	1	1	1	好吃	1	1	1	2	0	0	1	2	2	2	1	2	2	1	4	7	4	7	4	4	5	5	1	5	2	5	2	5	3	6	3
779	1	1	0	1	1	火腿肠	1	3	1	2	0	0	1	1	2	2	1	1	1	2	6	4	3	7	6	6	2	3	6	7	6	4	6	6	7	6	2
780	1	1	0	1	1	素肉	1	3	1	2	0	0	1	2	1	2	1	3	2	1	4	4	6	5	3	5	3	3	5	5	3	5	5	5	5	4	2
781	1	1	0	1	1	豆制品	1	1	1	2	0	0	1	2	2	2	1	2	1	1	5	6	6	6	3	6	3	5	6	6	7	6	7	7	7	6	2
782	1	1	0	1	1	味道还可以	1	3	1	3	1	2	1	1	1	1	1	1	1	1	5	5	5	5	3	5	3	3	4	5	5	3	3	4	4	4	1
783	1	1	1	1	3	人造肉	3	3	1	2	0	0	1	1	2	2	2	2	1	1	5	4	5	6	2	5	3	4	3	4	4	3	3	4	3	3	2
784	1	1	0	1	1	科技与狠活	3	3	1	2	0	0	1	2	3	2	3	2	1	2	5	4	5	5	3	5	4	6	4	6	7	4	5	6	7	5	2
785	1	1	0	1	3	鱼豆腐	1	1	1	2	0	0	1	2	1	2	1	1	2	2	6	3	7	7	4	5	2	4	2	5	6	5	4	1	5	5	1
786	1	1	0	1	1	新颖肉类	2	1	1	2	0	0	1	2	1	3	1	1	2	2	6	4	7	5	3	4	2	5	5	7	5	2	6	4	6	4	2
787	1	1	0	2	2	用素菜代替	1	3	1	2	0	0	1	3	2	3	3	3	2	1	3	6	7	5	3	4	5	6	2	5	5	5	5	7	6	5	2
788	1	1	0	1	1	激素、添加剂	1	2	1	2	0	0	1	3	2	3	3	3	3	1	4	4	6	4	3	6	3	2	6	6	4	4	4	2	5	4	3
789	1	1	0	1	4	人造肉	3	3	1	2	0	0	1	2	2	2	3	3	2	1	3	5	4	3	3	5	3	4	3	5	3	3	4	3	2	3	2
790	1	1	0	1	2	其他植物做成的仿肉制品	1	3	1	2	0	0	1	3	2	2	2	1	2	1	4	6	7	6	3	6	4	5	1	2	5	4	5	6	5	4	2
791	1	1	0	1	1	豆制品	1	2	1	1	1	1	2	1	1	2	1	3	1	1	4	4	4	5	4	5	5	5	6	4	5	6	5	5	6	6	1
792	1	1	0	1	1	植物肉	1	1	1	3	1	2	2	1	2	1	1	2	1	1	7	1	3	6	1	7	1	6	1	6	5	5	2	5	5	6	2
793	1	1	0	1	3	人造肉，植物肉	1	3	1	2	0	0	1	2	2	2	1	2	1	1	5	6	7	4	3	5	3	4	6	4	5	4	5	6	6	4	2
794	1	1	0	1	1	素毛肚，素鸡，	1	2	1	2	0	0	2	2	2	1	3	2	1	1	7	4	5	6	3	6	4	2	5	7	4	5	4	6	7	5	3
795	1	1	0	1	3	人造肉	3	1	1	2	0	0	1	2	2	2	1	2	1	1	5	4	5	4	3	5	2	1	4	5	6	6	6	5	5	4	2
796	1	1	1	1	1	素肉	1	2	1	2	0	0	1	2	3	2	1	2	3	1	3	7	6	5	1	4	6	3	7	6	5	6	5	5	6	6	1
797	1	1	0	2	3	素食肉	1	1	1	2	0	0	1	2	2	2	2	2	1	1	2	6	7	2	5	2	4	6	2	3	6	5	5	7	6	6	2
798	1	1	0	1	1	印象不是很好，淀粉代替肉类。	1	3	1	2	0	0	1	2	1	2	1	1	3	3	5	4	5	6	6	4	5	4	6	5	6	5	7	6	5	6	2
799	1	1	0	3	1	不知道	3	3	1	1	1	1	2	1	2	1	2	2	2	1	6	2	1	6	2	7	1	2	4	7	6	7	5	3	1	6	3
800	1	1	0	1	1	大豆类食品	1	3	1	2	0	0	1	2	1	2	1	2	2	1	1	3	6	5	7	3	4	6	5	6	4	6	3	7	5	3	3
801	1	1	0	1	1	植物肉	1	2	1	2	0	0	1	2	2	1	2	1	2	2	6	4	6	4	5	6	4	6	5	6	5	6	7	5	6	4	2
802	1	1	0	1	1	素牛肉	1	3	1	2	0	0	2	2	2	1	2	1	1	1	3	5	6	6	3	5	3	6	2	5	5	5	6	7	6	6	2
803	1	1	0	1	2	素食主义	1	3	1	2	0	0	1	2	2	2	2	2	2	1	4	3	2	5	2	6	1	3	7	6	3	4	3	5	4	5	3
804	1	1	1	2	1	营养，健康，卫生	1	3	1	2	0	0	2	1	2	1	2	2	1	1	7	1	6	7	1	7	1	3	7	6	7	6	7	4	6	7	3
805	1	1	1	2	3	人造肉？豆制品？	1	2	1	3	1	2	1	2	1	2	2	1	2	1	6	3	5	6	2	5	4	6	2	6	6	4	5	5	6	7	2
806	1	1	0	1	3	是由植物培育而来，有肉味，而且有肉类的营养	1	3	1	2	0	0	1	2	2	2	1	2	1	2	4	5	6	4	3	5	4	5	3	5	4	5	5	6	6	5	3
807	1	1	1	1	1	豆制品	1	1	1	2	0	0	2	2	2	1	1	2	2	1	5	6	4	6	2	5	4	1	7	6	7	4	3	5	2	4	2
808	1	1	0	1	2	大豆制品	1	1	1	2	0	0	1	3	3	2	3	3	2	3	6	5	7	5	4	6	3	2	6	5	3	3	2	2	3	3	2
809	1	1	0	2	1	无肉不欢	1	1	1	2	0	0	1	3	1	1	3	1	1	1	4	7	3	7	2	6	6	2	2	2	7	2	4	6	6	6	2
810	1	1	0	1	3	鱼豆腐，素鸡	1	3	1	2	0	0	1	2	1	2	2	2	1	1	4	7	7	5	4	4	4	3	3	6	7	5	5	5	5	6	2
811	1	1	0	1	2	假的	1	2	1	3	1	2	1	2	1	2	3	3	2	2	4	6	6	4	4	4	5	5	2	3	4	3	4	3	4	4	2
812	1	1	0	2	1	非肉类，用植物替代的素食	1	1	1	2	0	0	1	3	2	3	1	3	2	1	5	4	6	4	3	5	2	4	2	4	4	2	2	4	2	5	1
813	1	1	0	4	1	豆腐	1	3	1	2	0	0	2	2	2	2	2	1	2	1	4	5	4	5	3	5	3	4	2	4	4	3	4	5	4	4	4
814	1	1	1	1	2	大豆制品	1	3	1	1	1	2	1	2	3	2	3	3	1	1	4	3	6	4	3	4	4	5	2	3	5	5	4	5	6	4	2
815	1	1	1	1	1	淀粉	1	3	1	2	0	0	1	3	2	2	1	2	2	1	7	4	7	5	2	6	2	4	2	5	6	5	4	5	4	4	2
816	1	1	0	1	1	胶原蛋白	1	1	1	2	0	0	1	2	1	2	1	1	2	2	5	6	4	5	3	5	4	5	3	6	4	4	4	5	5	4	3
817	1	1	0	1	3	人造素肉	1	3	1	3	1	1	1	1	1	2	2	2	2	1	4	5	6	5	4	5	6	4	4	5	5	6	5	6	5	5	3
818	1	1	0	2	1	口感很好，味道鲜美	1	2	1	1	1	2	1	1	2	2	1	2	2	1	5	4	7	5	3	5	2	4	3	5	7	7	7	6	6	6	2
819	1	1	0	1	3	合成牛肉	1	3	1	3	1	2	1	3	2	3	3	3	1	1	4	6	7	6	4	6	2	4	3	7	6	5	4	7	4	6	3
820	1	1	0	1	3	新奇	1	3	1	2	0	0	1	3	2	3	1	3	2	2	4	6	6	5	2	5	3	2	2	4	6	6	5	5	5	5	1
821	1	1	0	1	1	素肉	1	3	1	3	1	2	1	2	1	2	2	1	2	2	5	2	4	5	1	7	1	5	5	4	4	3	4	6	7	6	2
822	1	1	0	1	1	人造肉，腐竹	1	3	1	2	0	0	1	2	3	1	2	2	2	1	5	5	7	6	4	6	5	3	5	5	6	6	6	5	5	4	1
823	1	1	0	1	1	豆腐	1	3	1	3	1	2	1	2	1	1	1	2	2	1	5	4	6	6	2	5	3	1	5	5	5	5	6	6	5	6	2
824	1	1	0	1	2	素肉	1	1	1	2	0	0	1	2	1	2	2	1	2	2	5	5	3	4	5	6	3	4	5	3	4	5	6	4	6	6	2
825	1	1	0	1	3	合成肉类似肉类	1	3	1	3	1	2	1	2	2	2	2	1	2	1	4	3	5	6	2	5	2	4	2	5	4	5	5	4	4	4	2
826	1	1	0	1	1	豆腐皮	1	3	1	2	0	0	1	2	1	2	2	1	2	1	5	4	7	6	2	7	2	3	4	7	5	3	3	4	4	5	1
827	1	1	0	1	3	植物类蛋白合成物	1	3	1	2	0	0	1	2	2	2	2	2	2	1	4	6	7	5	4	6	3	5	4	5	4	3	2	4	3	2	3
828	1	1	0	1	1	淀粉肠	3	3	1	3	1	2	1	3	2	3	3	3	3	1	4	4	4	6	4	7	3	1	5	3	1	1	1	1	1	1	3
829	1	1	0	1	3	淀粉火腿肠	1	2	1	2	0	0	1	2	1	2	2	1	2	2	4	5	6	5	2	6	6	1	4	6	6	6	5	5	4	2	2
830	1	1	0	1	3	豆制品	1	3	1	3	1	2	1	2	2	3	3	3	3	3	6	4	6	4	6	6	3	3	2	1	6	2	5	6	4	4	2
831	1	1	0	1	1	素肉	1	2	1	2	0	0	1	3	2	1	2	3	2	1	5	4	5	5	3	5	3	5	6	6	5	6	6	5	5	5	3
832	1	1	0	1	3	用素食代替肉类	1	3	1	2	0	0	1	2	1	1	2	2	1	1	5	6	4	6	3	5	4	2	6	5	5	7	6	5	6	7	2
833	1	1	0	1	3	大豆蛋白	1	3	1	2	0	0	1	2	2	2	1	2	2	1	5	4	6	6	3	6	3	1	6	4	5	5	4	6	6	6	2
834	1	1	1	1	1	一般是大豆制品，口感好，比肉有嚼劲	1	1	1	2	0	0	1	3	2	2	3	3	3	1	5	4	4	6	3	6	3	4	4	6	5	7	7	6	7	7	3
835	1	1	0	1	3	用素食代替肉类	1	3	1	2	0	0	1	2	1	1	1	2	2	1	4	3	5	5	3	6	2	3	3	4	5	6	5	6	4	5	3
836	1	1	0	2	1	大豆蛋白	1	2	1	3	1	2	1	2	2	2	2	2	1	1	3	7	7	4	7	6	4	7	2	4	7	5	6	6	3	1	2
837	1	1	0	1	1	豆制品	1	3	1	2	0	0	1	2	1	2	3	1	2	2	3	2	3	4	5	5	2	4	2	3	6	3	4	4	5	4	2
838	1	1	0	1	4	人造肉，造假	1	3	1	2	0	0	1	2	1	2	3	2	2	1	2	4	5	4	4	5	4	4	3	5	4	3	4	5	4	3	2
839	1	1	0	1	3	豆制品	1	3	1	2	0	0	1	2	2	2	1	2	1	1	6	4	4	5	4	6	4	3	5	6	6	7	5	7	6	7	2
840	1	1	0	2	3	素肉	3	2	1	2	0	0	2	2	2	2	1	2	2	2	6	4	5	6	4	3	5	6	5	6	6	5	7	5	6	6	3
841	1	1	0	1	3	大豆制品	1	3	1	2	0	0	1	2	1	1	1	2	2	1	5	3	4	6	2	5	3	4	6	7	4	3	4	5	5	3	2
842	1	1	0	1	1	火腿，培养基	1	3	1	2	0	0	1	2	2	1	3	2	1	2	7	3	6	4	2	7	6	4	3	5	5	3	2	4	7	6	3
843	1	1	0	1	3	不安全	3	3	1	3	1	2	1	2	2	2	2	1	2	2	7	1	7	4	3	5	4	6	3	5	5	7	5	4	4	4	2
844	1	1	0	1	1	限制加工肉制品如培根、香肠的摄入，包括奶酪和比萨，选择新鲜瘦肉和低脂奶酪替代。	1	3	1	2	0	0	2	2	2	1	1	2	1	1	6	5	5	6	5	5	4	5	6	6	5	5	4	6	6	5	3
845	1	1	0	1	2	假货	1	3	1	3	1	2	1	2	2	1	1	2	2	1	3	5	6	4	3	6	6	7	2	3	6	6	5	6	7	7	1
846	1	1	0	1	1	非肉类	1	2	1	2	0	0	2	1	2	1	2	2	1	1	6	2	4	7	1	6	2	3	3	6	7	6	6	7	5	5	2
847	1	1	0	1	3	什么是肉类替代品	1	1	1	3	1	2	1	3	2	3	1	3	3	3	5	6	5	7	2	5	2	2	6	6	6	6	3	6	7	5	2
848	1	1	0	1	1	素肉素牛筋	1	2	1	2	0	0	1	1	1	1	1	2	2	1	5	4	4	7	2	6	3	1	3	7	5	6	5	7	6	5	3
849	1	1	1	1	3	植物肉蛋白	3	3	1	3	1	2	1	2	1	2	1	1	2	1	5	6	7	5	3	5	3	2	5	5	5	4	5	3	5	5	2
850	1	1	0	1	1	合成肉	3	1	1	2	0	0	1	2	1	1	2	2	2	1	5	6	7	4	3	6	4	5	2	5	4	5	3	4	6	5	4
851	1	1	0	2	1	腐竹	1	2	1	2	0	0	1	2	2	2	1	2	1	1	3	5	6	6	4	5	3	5	3	5	5	6	6	5	5	5	2
852	1	1	0	1	1	面筋	1	3	1	2	0	0	1	3	2	3	1	2	2	1	1	7	7	4	4	1	7	7	1	4	6	6	5	5	6	5	2
853	1	1	0	1	1	大豆蛋白	1	2	1	3	1	2	1	2	1	2	1	2	1	1	7	3	6	7	2	6	2	5	7	7	5	6	4	3	5	3	2
854	1	1	0	1	1	豆制品，假肉	1	1	1	2	0	0	1	2	2	3	3	3	2	1	4	5	6	4	4	4	5	5	5	4	4	4	4	3	3	2	2
855	1	1	0	1	1	虚伪的素食主义者	1	2	1	2	0	0	1	2	1	2	2	2	2	1	2	6	4	6	4	5	6	6	2	4	5	4	6	4	6	5	3
856	1	1	0	1	1	没肉好吃	3	3	1	2	0	0	1	3	2	2	3	2	1	1	7	5	7	7	4	5	3	4	4	5	5	4	7	5	5	6	2
857	1	1	0	1	1	素鸡	1	1	1	2	0	0	1	2	1	1	1	2	2	1	5	5	4	6	2	6	3	4	3	6	4	3	2	6	5	4	3
858	1	1	0	1	2	加工的食物，但不是真正的肉类	1	3	1	2	0	0	1	3	2	3	3	3	1	1	4	5	5	4	3	5	4	5	6	5	5	6	6	5	5	6	2
859	1	1	0	1	1	豆腐	1	3	1	2	0	0	1	2	1	2	2	1	2	2	3	5	5	4	4	3	5	5	3	4	5	5	5	5	5	5	1
860	1	1	0	1	1	合成肉	1	2	1	2	0	0	1	2	2	2	3	3	3	1	6	3	7	7	1	7	2	2	6	7	7	6	6	7	7	7	3
861	1	1	0	1	2	合成肉 注水肉	2	3	1	2	0	0	1	3	2	3	3	3	3	3	3	6	7	5	3	4	2	2	1	4	4	3	4	4	3	4	2
862	1	1	0	1	1	素肉，素鸡	1	2	1	3	1	2	1	2	2	2	2	2	2	1	5	6	7	6	3	5	7	6	2	5	7	6	7	6	3	3	2
863	1	1	0	1	2	人造肉，价格便宜，但没有肉营养价值高	1	2	1	2	0	0	1	2	1	2	2	1	2	1	4	6	4	5	5	4	5	5	3	4	6	6	5	5	5	4	3
864	1	1	0	1	1	可以接受	1	3	1	2	0	0	1	2	2	2	2	1	2	2	4	6	6	6	2	5	4	5	2	5	6	6	3	5	6	3	1
865	1	1	0	1	2	味道不行	1	2	1	2	0	0	1	2	1	2	1	1	2	2	6	4	6	4	6	5	4	5	5	5	6	5	5	5	6	5	3
866	1	1	1	1	1	豆腐	2	3	1	3	1	2	1	2	2	2	2	2	1	2	4	5	7	6	3	4	3	2	5	6	7	5	6	6	5	6	2
867	1	2	1	1	1	豆腐制品 蘑菇	1	2	1	2	0	0	2	1	2	1	2	1	1	1	6	4	7	6	2	6	5	4	3	6	6	5	5	6	5	6	2
868	1	2	0	1	1	非常喜欢	1	2	1	3	1	2	1	2	1	2	2	2	1	1	6	3	4	6	4	5	2	2	6	6	7	7	6	7	7	6	2
869	1	2	0	1	3	用植物制作的代替肉类的食物	1	3	1	2	0	0	2	1	2	1	2	1	1	1	4	3	7	5	2	4	3	1	7	5	1	1	2	4	4	1	2
870	1	2	0	1	4	健康	1	3	1	2	0	0	1	1	2	2	1	3	2	2	5	7	7	5	4	5	7	5	3	4	2	2	2	2	4	2	2
871	1	2	0	1	1	素食代替肉类	1	1	1	3	1	2	2	1	2	1	2	1	1	1	2	5	6	3	2	3	3	6	2	5	6	7	6	5	6	7	4
872	1	2	1	1	2	无	2	3	1	2	0	0	2	2	1	3	2	3	2	1	3	5	6	7	4	5	7	5	4	7	4	7	5	7	4	7	2
873	1	2	0	1	2	人造肉，素肉	1	3	1	2	0	0	2	1	2	1	1	1	1	2	5	6	7	7	4	6	4	5	1	6	4	5	5	7	6	4	2
874	1	2	1	1	3	替代肉的食品	3	3	1	2	0	0	1	3	1	1	3	1	2	2	6	5	4	6	3	2	4	7	2	5	6	5	4	5	6	5	1
875	1	2	1	1	4	无	3	3	1	3	1	2	1	1	3	3	2	2	2	3	3	5	6	4	4	4	4	6	3	4	6	4	5	6	4	4	1
876	1	2	0	1	1	火腿	1	1	1	3	1	2	1	1	1	3	2	3	1	1	6	3	4	6	3	6	5	4	5	6	7	6	7	7	6	7	3
877	1	2	0	2	3	植物肉	3	3	1	2	0	0	1	1	2	1	1	2	1	1	6	4	4	6	4	6	4	4	3	6	4	5	4	6	6	5	2
878	1	2	0	1	3	低脂肪高蛋白食物	1	2	1	2	0	0	2	2	1	3	1	2	1	2	7	5	2	6	1	4	6	7	5	6	6	4	6	4	7	5	2
879	1	2	0	1	3	可持续的，高科技的	3	1	1	2	0	0	1	1	2	3	2	2	2	3	5	6	6	7	6	5	5	3	1	6	5	6	5	7	6	5	4
880	1	2	1	1	1	健康	1	1	1	2	0	0	2	2	1	1	1	2	2	2	5	3	4	5	2	5	2	4	4	6	4	4	5	5	6	5	4
881	1	2	0	1	3	蔬菜做的肉饼	1	3	1	2	0	0	1	1	2	2	2	1	1	1	7	4	5	6	4	7	2	5	6	7	5	3	5	5	6	6	2
882	1	2	0	1	3	人造肉	1	1	1	2	0	0	2	1	2	2	1	1	1	1	5	4	6	7	2	5	4	4	5	6	5	4	5	6	5	6	4
883	1	2	1	1	2	蛋白肉	1	3	1	3	1	2	1	1	2	2	2	2	1	1	3	5	6	5	3	4	4	2	5	6	5	4	5	5	4	4	3
884	1	2	1	2	1	素牛肉	3	3	1	3	1	2	1	1	1	1	2	2	1	1	6	5	7	4	3	3	3	3	2	5	5	6	5	6	6	5	3
885	1	2	0	1	3	健康养生	1	3	1	3	1	2	2	1	2	1	1	1	2	1	3	6	7	5	4	5	5	4	1	4	6	5	5	6	5	6	3
886	1	2	1	1	1	人造肉	1	2	1	2	0	0	1	1	2	2	1	2	1	1	5	6	3	7	4	4	3	6	4	6	4	6	5	6	6	7	2
887	1	2	1	2	3	蘑菇	1	2	1	2	0	0	3	3	2	3	1	3	2	1	7	1	1	6	1	6	1	1	4	7	7	4	7	6	6	7	4
888	1	2	1	1	1	还挺好吃的	1	3	1	3	1	2	2	1	2	1	2	1	1	1	5	2	2	6	2	6	2	4	6	6	5	5	5	5	5	6	3
889	1	2	1	1	1	豆制品	1	3	1	2	0	0	1	1	2	1	1	2	1	1	5	3	7	5	2	6	2	4	4	6	5	3	4	5	5	6	2
890	1	2	0	1	1	有肉味的食品	3	1	1	3	1	1	2	1	2	2	1	1	2	1	4	5	4	6	5	6	4	5	4	6	6	5	7	6	5	7	4
891	1	2	0	1	3	人工合成肉	1	1	1	2	0	0	2	1	2	2	1	1	1	1	6	2	4	5	3	6	2	4	2	5	5	5	6	4	5	5	4
892	1	2	1	2	1	火腿	1	3	1	3	1	2	1	3	2	3	3	3	2	3	4	7	7	4	6	6	5	6	1	5	6	4	6	5	6	4	2
893	1	2	0	1	3	植物蛋白，合成肉	1	3	1	2	0	0	1	1	2	2	2	2	2	1	4	5	6	5	3	5	3	4	5	6	5	4	5	6	6	5	2
894	1	2	0	1	1	人造肉(好像是豆类做的)	1	3	1	2	0	0	1	1	2	1	1	3	2	3	5	6	4	5	4	7	4	1	6	5	4	5	4	6	5	6	2
895	1	2	1	1	1	人造肉	1	3	1	2	0	0	1	2	2	1	1	1	1	1	6	3	1	1	2	7	1	1	6	7	4	7	6	4	7	1	2
896	1	2	0	1	3	milk	3	3	1	2	0	0	1	1	2	1	1	2	1	1	5	3	4	6	2	6	3	1	7	7	4	4	4	4	5	4	2
897	1	2	0	1	3	惊讶	3	1	1	2	0	0	2	1	2	1	1	1	2	1	4	7	6	5	4	5	5	3	4	6	6	5	4	7	5	4	2
898	1	2	1	1	4	没有必要出现	1	3	1	2	0	0	1	1	2	2	2	2	2	3	5	3	7	4	3	4	2	6	2	4	4	3	2	6	4	3	4
899	1	2	0	1	2	减肥代餐	1	3	1	2	0	0	1	1	2	1	2	2	1	2	6	5	7	6	3	6	2	4	5	6	5	6	4	5	7	5	3
900	1	2	0	1	1	健不健康	1	1	1	2	0	0	1	1	2	1	2	1	1	1	5	6	6	4	4	6	3	5	5	6	5	6	5	4	5	5	3
901	1	2	0	1	3	植物肉	3	1	1	2	0	0	1	1	2	1	1	2	1	1	5	4	5	6	3	5	2	3	7	5	5	5	4	6	5	5	3
902	1	2	1	4	3	不好吃	1	2	1	2	0	0	1	1	2	2	2	1	2	1	5	7	6	7	5	5	7	4	5	4	6	4	7	5	4	7	3
903	1	2	1	2	1	素肉	1	1	1	2	0	0	2	2	2	1	2	1	1	2	5	4	5	4	4	5	3	3	4	5	5	5	5	4	5	4	2
904	1	2	0	1	1	豆制品	1	3	1	2	0	0	1	1	2	1	1	2	1	1	6	4	3	7	3	6	2	2	5	7	6	5	6	7	5	6	2
905	1	2	1	1	3	不油腻	1	1	1	2	0	0	1	2	1	2	2	1	2	2	4	5	6	5	6	5	6	6	5	4	6	4	5	6	5	5	1
906	1	2	1	1	3	蔬菜	3	3	1	2	0	0	2	1	2	1	1	1	1	1	5	5	6	5	4	5	4	4	6	5	4	4	4	6	4	5	4
907	1	2	0	1	3	豆制品	1	3	1	2	0	0	1	1	2	2	1	2	1	2	5	4	7	5	1	6	3	4	3	6	4	5	3	5	5	4	2
908	1	2	1	2	2	素食	1	3	1	2	0	0	3	1	2	1	2	1	1	1	3	6	7	4	6	4	6	7	1	5	7	6	7	7	6	3	3
909	1	2	1	1	1	人造肉	3	1	1	3	1	2	1	1	2	1	1	1	2	1	4	6	7	6	3	5	3	6	3	6	7	7	6	6	6	6	3
910	1	2	0	1	2	素食	1	2	1	2	0	0	1	1	2	1	2	1	2	1	7	2	1	6	2	6	1	3	6	7	7	6	7	6	7	6	2
911	1	2	1	1	1	黑科技	1	3	1	2	0	0	1	3	2	1	2	2	1	1	5	5	4	6	2	6	4	1	7	5	5	6	4	7	5	3	2
912	1	2	0	1	1	好吃的，有营养	1	3	1	1	1	2	1	1	1	1	3	3	2	3	5	6	7	5	2	7	6	1	5	5	6	6	7	5	7	6	2
913	1	2	0	1	2	大豆，科技	1	3	1	2	0	0	1	2	2	2	2	2	2	3	6	5	7	6	2	5	4	4	1	5	5	6	4	4	6	3	2
914	1	2	0	1	3	合成肉	1	3	1	2	0	0	2	1	2	1	2	1	1	1	3	7	7	4	6	5	4	6	4	5	7	7	7	7	7	6	2
915	1	2	1	1	1	豆素肉	1	3	1	2	0	0	1	1	2	1	1	1	1	1	6	5	7	7	2	6	4	3	4	5	6	5	6	7	5	4	3
916	1	2	1	2	1	比肉好吃	1	3	1	2	0	0	1	1	1	1	2	2	1	1	4	5	7	4	2	3	5	6	2	5	5	5	6	6	7	5	2
917	1	2	1	1	3	有蔬菜做出肉的味道	1	1	1	2	0	0	2	2	2	1	1	2	2	1	5	4	6	5	5	4	5	5	7	6	6	5	5	7	6	6	2
918	1	2	1	1	2	汉堡包	1	1	1	3	1	2	1	1	2	3	1	2	1	3	5	6	7	4	2	5	4	7	1	5	5	7	6	7	5	6	2
919	1	2	1	1	2	猪肉替代品	3	1	1	3	1	1	1	1	2	2	2	2	2	1	3	6	5	3	5	4	4	4	2	3	5	5	6	6	6	6	2
920	1	2	1	1	3	假肉，豆制品	1	3	1	1	1	2	1	1	2	1	1	1	2	1	6	4	5	6	2	6	2	4	5	6	5	4	5	6	6	6	3
921	1	2	0	1	2	塑料感	1	3	1	2	0	0	1	1	2	2	1	2	2	1	3	7	6	5	3	5	6	4	2	7	1	2	1	4	5	6	2
922	1	2	0	2	1	健康环保	1	2	1	2	0	0	1	1	2	1	1	1	1	1	5	3	4	6	2	5	3	4	3	6	5	6	5	6	6	5	1
923	1	2	0	1	1	味道，营养	1	3	1	3	1	2	1	1	2	2	1	1	1	1	5	3	4	3	6	4	3	5	7	3	6	2	6	4	3	4	1
924	1	2	0	1	3	便宜	1	3	1	2	0	0	1	1	1	1	1	3	1	1	6	5	4	7	6	5	6	4	5	6	6	4	7	5	6	4	2
925	1	2	1	1	1	植物蛋白质	1	3	1	2	0	0	1	1	1	1	1	2	1	3	4	5	7	3	4	5	6	4	4	3	5	5	4	5	5	4	2
926	1	2	1	1	3	不是肉但口感与肉相近，且比肉贵	1	1	1	2	0	0	1	1	2	1	2	2	1	2	4	6	7	6	3	5	4	4	2	5	4	4	4	5	4	5	1
927	1	2	0	2	3	细胞肉、植物肉	1	3	1	2	0	0	2	1	1	2	2	1	2	2	4	5	6	5	4	5	4	5	4	3	6	7	6	5	5	6	2
928	1	2	1	1	2	人造肉	1	3	1	2	0	0	1	1	2	1	1	3	1	3	5	6	6	6	4	5	3	3	4	5	4	5	4	5	4	4	2
929	1	2	0	1	1	素肉	1	3	1	1	1	3	2	1	2	1	1	1	1	1	6	3	4	6	3	5	3	3	6	6	5	5	4	6	6	6	2
930	1	2	0	1	2	合成	1	3	1	2	0	0	3	1	3	3	3	3	3	3	4	6	7	4	4	3	2	4	5	4	7	6	5	4	4	5	2
931	1	2	0	1	1	很贵吧应该	1	3	1	2	0	0	1	1	2	2	2	1	1	1	4	6	6	6	4	5	3	5	3	4	4	4	3	5	5	5	1
932	1	2	1	1	1	好吃	3	2	1	3	1	2	2	1	2	1	2	3	1	1	6	5	4	6	5	6	5	6	4	4	5	4	6	5	6	7	2
933	1	2	1	1	1	合成肉	1	2	1	2	0	0	1	1	1	1	2	1	1	1	5	6	7	6	5	6	4	4	4	5	7	7	6	4	5	5	2
934	1	2	0	1	4	豆腐做的，坑人的，不靠谱	1	1	1	2	0	0	3	3	2	3	2	3	1	3	3	6	7	7	5	4	6	6	3	3	1	1	2	4	2	1	2
935	1	2	1	1	3	素食主义者	3	3	1	3	1	3	1	1	2	2	1	2	2	1	6	4	4	7	4	6	3	2	6	7	4	3	2	4	2	3	2
936	1	2	0	1	1	鸡蛋 牛奶	3	3	1	2	0	0	1	1	2	1	1	2	2	1	5	4	6	7	5	6	4	6	4	5	6	5	6	5	7	6	2
937	1	2	1	1	2	鸡胸肉减肥特好	1	1	1	3	1	3	2	1	2	1	1	2	3	3	7	5	5	6	4	7	6	7	5	4	7	6	7	6	7	7	2
938	1	2	1	1	1	淀粉肠	1	3	1	3	1	2	1	1	3	1	1	2	1	1	7	4	6	7	2	6	2	6	4	6	7	5	6	7	7	6	3
939	1	2	1	1	3	罐头	3	3	1	2	0	0	1	1	1	1	1	1	1	1	5	6	4	6	4	6	3	4	4	4	5	5	5	5	5	5	2
940	1	2	1	1	3	奇怪的组合	1	3	1	2	0	0	1	1	1	1	1	2	1	1	6	2	4	5	3	6	2	4	5	5	6	6	7	6	5	6	4
941	1	2	0	1	1	用植物做成肉类	3	3	1	2	0	0	1	1	2	1	2	1	1	1	4	6	6	6	3	5	4	5	2	6	6	7	6	5	6	5	2
942	1	2	1	1	1	人工合成	1	3	1	2	0	0	1	1	2	2	2	1	2	1	5	4	6	7	3	6	2	4	5	6	6	7	7	7	5	6	2
943	1	2	1	1	2	不健康	1	3	1	2	0	0	3	1	2	3	3	3	2	3	5	4	6	6	4	5	3	5	2	6	6	5	6	7	6	5	1
944	1	2	0	1	1	豆制品	1	1	1	2	0	0	1	3	2	1	3	3	1	3	5	4	7	5	3	5	4	3	6	5	4	6	4	7	5	6	3
945	1	2	0	1	3	火腿肠，丸子之类的	3	1	1	3	1	1	1	1	2	2	1	1	2	1	6	4	4	6	3	6	2	3	6	6	6	5	5	4	6	6	2
946	1	2	1	1	3	蛋白质	1	3	1	2	0	0	1	1	1	1	2	1	1	1	4	5	5	6	3	5	4	5	3	4	6	6	6	7	7	6	2
947	1	2	1	2	1	植物肉	3	1	1	3	1	1	1	1	1	1	2	1	1	1	3	6	7	7	3	4	7	6	1	6	4	4	3	7	5	4	2
948	1	2	0	1	1	豆腐	1	1	1	2	0	0	2	1	1	1	3	1	2	2	6	2	5	7	2	6	1	5	5	7	6	6	7	6	7	7	3
949	1	2	1	1	3	不好	2	3	1	1	1	3	1	2	2	2	1	1	2	2	5	3	6	5	4	6	4	6	5	4	4	6	5	4	6	4	1
950	1	2	1	1	3	素肉 豆制品	1	1	1	2	0	0	2	1	2	2	1	1	2	2	5	3	6	6	3	6	3	5	3	4	5	5	5	7	5	5	3
951	1	2	0	1	1	非常美味	1	3	1	3	1	3	1	1	2	3	2	3	3	1	2	4	1	7	3	5	1	2	7	6	2	4	3	7	6	5	2
952	1	2	0	1	1	豆干	1	3	1	3	1	2	1	2	1	1	2	1	2	2	6	4	5	5	3	6	3	3	5	5	5	6	6	5	4	4	2
953	1	2	0	1	1	新潮 环保	1	2	1	2	0	0	1	1	1	1	1	2	2	1	5	2	2	6	2	6	2	4	5	6	5	5	5	6	6	6	3
954	1	2	0	1	3	大豆制品	1	1	1	2	0	0	2	1	2	1	2	1	2	2	6	4	5	6	2	7	3	4	5	6	5	5	6	6	5	4	2
955	1	2	1	1	1	豆腐	1	3	1	2	0	0	1	1	2	1	1	2	1	1	7	2	6	7	2	7	1	4	4	6	5	4	5	6	5	7	3
956	1	2	1	2	3	既能满足吃肉的欲望同时又能吃得比较健康	3	3	1	2	0	0	1	3	3	1	1	3	1	3	5	4	6	5	3	5	4	3	5	6	6	5	5	6	5	6	3
957	1	2	1	1	3	假肉	1	1	1	2	0	0	1	1	2	2	1	1	1	1	4	6	6	3	4	6	4	5	1	4	3	4	5	5	6	3	2
958	1	2	1	1	1	低脂健康	1	3	1	1	1	2	1	1	2	1	2	1	1	1	6	4	3	6	4	6	3	4	2	4	5	4	5	6	5	6	2
959	1	2	0	1	1	汉堡包	1	3	1	2	0	0	2	1	1	1	2	2	2	1	4	6	4	4	3	5	3	4	4	5	4	5	4	4	4	5	3
960	1	2	1	1	2	某个快餐的汉堡肉	1	3	1	2	0	0	1	1	2	1	1	3	1	1	4	6	5	5	5	6	3	3	4	5	3	4	3	5	4	4	3
961	1	2	0	1	3	大豆蛋白，植物蛋白	1	3	1	2	0	0	1	1	2	1	1	3	1	2	5	4	6	5	7	6	3	5	6	6	6	5	6	6	7	5	3
962	1	2	1	1	1	素牛肚	1	1	1	2	0	0	1	1	2	1	1	1	2	1	6	5	7	5	3	5	3	5	4	6	6	6	7	5	4	4	2
963	1	2	1	1	1	人造肉	3	3	1	2	0	0	1	2	2	1	2	1	1	1	6	5	7	6	3	5	4	4	6	6	5	4	4	6	4	5	1
964	1	2	1	1	1	含添加剂	1	1	1	2	0	0	2	1	1	3	3	3	2	2	5	6	5	6	4	6	5	4	5	4	5	6	5	5	6	4	1
965	1	2	1	1	1	烤肠	1	1	1	3	1	2	1	1	2	1	1	3	1	1	4	5	7	7	6	4	6	7	4	7	7	6	7	6	7	7	2
966	1	2	1	1	3	蘑菇	1	3	1	2	0	0	2	1	1	1	1	1	2	2	6	5	4	4	5	3	4	6	3	3	4	3	4	4	5	4	2
967	1	2	0	1	3	午餐肉	1	1	1	2	0	0	2	1	1	3	1	2	3	1	3	4	2	4	4	3	4	5	4	7	1	7	7	7	7	1	3
968	1	2	1	1	3	营养跟肉相并，但是是素食做成的	1	3	1	2	0	0	1	1	2	2	1	1	2	2	7	5	5	4	4	5	6	4	4	5	5	6	6	6	7	7	2
969	1	2	1	1	1	有的还挺好吃的	1	3	1	2	0	0	3	1	1	1	3	1	2	3	4	3	7	4	3	5	3	5	1	4	5	4	5	5	4	4	4
970	1	2	1	1	1	火腿肠	1	1	1	2	0	0	1	1	2	1	1	2	1	1	6	4	7	6	2	7	3	5	6	6	4	4	4	6	7	4	3
971	1	2	1	1	1	营养，健康	3	1	1	2	0	0	1	1	2	2	2	1	1	3	1	6	7	1	2	3	7	6	1	5	7	6	5	7	6	7	3
972	1	2	0	1	1	跟肉类一样口味的非肉类食物	1	1	1	2	0	0	2	1	1	2	2	1	2	1	6	2	1	6	2	6	2	1	6	7	6	7	7	5	6	5	3
973	1	2	0	1	3	豆制品	1	3	1	2	0	0	1	1	2	1	2	2	2	1	6	2	6	6	2	6	2	2	6	6	6	2	6	6	4	4	3
974	1	2	1	1	2	素食汉堡	1	1	1	3	1	2	1	1	2	1	1	2	1	1	5	4	5	5	6	5	6	4	2	2	6	3	6	4	5	5	4
975	1	2	0	1	1	素食牛排，那些素肉，便利店里一块钱一包的小零食	1	3	1	2	0	0	1	1	2	1	3	1	2	1	5	4	6	7	2	5	1	2	6	7	5	6	5	7	6	5	3
976	1	2	1	1	1	素肉	1	3	1	3	1	2	1	1	1	1	3	1	2	1	5	6	7	7	1	5	3	2	1	6	5	4	5	7	4	5	3
977	1	2	1	1	1	火腿肠，	1	1	1	2	0	0	1	1	2	1	1	2	2	2	6	5	7	6	4	5	4	6	4	5	5	6	5	6	5	6	3
978	1	2	1	1	3	吃肉味的素	1	3	1	2	0	0	1	1	2	1	2	1	1	1	5	5	7	6	6	7	4	3	5	5	6	6	6	6	6	6	2
979	1	2	1	1	3	人造肉	1	1	1	2	0	0	2	1	2	1	1	1	1	1	5	3	7	7	2	6	1	4	4	6	6	5	5	7	6	6	2
980	1	2	1	1	1	豆干	3	3	1	2	0	0	1	2	1	2	2	1	1	1	6	5	2	3	4	6	2	2	6	6	3	4	4	5	6	7	2
981	1	2	0	1	4	人造肉	3	3	1	2	0	0	1	1	2	2	2	2	2	2	6	2	4	5	6	7	1	2	6	7	2	3	2	2	4	2	2
982	1	2	0	1	1	淀粉合成的口感类似肉类的食品。	1	3	1	2	0	0	1	1	1	3	2	2	2	1	2	7	7	1	4	4	6	1	4	5	6	4	4	7	5	6	3
983	1	2	1	1	2	人工肉	1	3	1	2	0	0	1	1	2	2	1	2	2	1	5	4	3	7	3	6	2	7	4	6	5	4	5	6	4	3	3
984	1	2	1	1	1	好吃	1	3	1	2	0	0	1	3	2	1	1	1	2	1	6	5	6	6	3	5	5	6	4	4	4	5	6	4	4	5	2
985	1	2	0	1	3	牛肉	2	1	1	3	1	2	1	1	2	2	2	1	1	1	6	5	7	3	6	3	5	4	7	3	7	5	3	7	4	6	3
986	1	2	1	1	3	健康或者是植物肉	1	2	1	2	0	0	1	1	2	1	1	1	1	1	6	5	3	6	3	6	3	3	4	6	6	6	6	5	7	3	2
987	1	2	0	1	3	植物蛋白	1	2	1	2	0	0	1	1	2	1	1	1	2	1	5	6	7	6	1	5	1	1	6	4	6	5	5	6	5	6	2
988	1	2	0	1	3	清淡，掺杂	1	3	1	2	0	0	1	2	2	1	1	1	1	1	6	4	6	4	3	6	2	1	5	6	6	6	7	5	5	7	2
989	1	2	0	1	2	豆腐	1	3	1	2	0	0	1	1	2	2	2	2	1	1	3	5	5	5	3	6	3	3	1	5	4	4	5	5	3	5	2
990	1	2	0	1	1	植物肉，用豆类代替的	3	1	1	2	0	0	1	1	2	2	3	2	1	3	4	5	6	7	2	5	1	4	6	7	7	6	5	7	4	5	3
991	1	2	0	1	2	大豆制品	1	3	1	2	0	0	1	1	1	2	1	2	1	1	6	4	4	5	6	7	6	4	3	7	7	6	4	7	7	6	2
992	1	2	0	2	2	疑惑	3	1	1	2	0	0	2	1	2	1	1	1	1	1	3	6	7	4	5	3	5	4	4	5	5	5	6	7	5	5	1
993	1	2	0	1	3	淀粉制品	1	3	1	2	0	0	1	3	2	3	3	3	2	1	5	6	4	6	6	4	6	5	5	6	5	7	6	6	5	5	3
994	1	2	1	1	3	素肉，植物肉。	3	3	1	3	1	2	1	1	2	3	2	2	1	3	4	7	6	6	2	6	4	3	2	6	4	3	3	3	5	4	3
995	1	2	1	1	1	火腿肠	1	1	1	2	0	0	1	1	2	2	2	1	2	1	6	4	5	6	3	5	3	4	6	7	6	7	5	6	4	4	2
996	1	2	1	1	1	不是真肉	1	1	1	2	0	0	1	2	2	1	1	3	2	3	5	5	7	6	3	5	3	6	2	5	5	5	6	6	6	5	3
997	1	2	1	1	1	肉类替代品正在兴起	1	1	1	3	1	2	1	1	3	2	1	1	2	1	5	4	6	7	3	6	2	5	1	4	5	4	6	2	5	5	3
998	1	2	1	1	3	嚼不动	1	1	1	2	0	0	1	1	2	3	1	1	2	1	4	5	6	5	4	4	3	4	3	5	4	5	5	4	4	3	2
999	1	2	1	1	3	豆制品制作的肉类	1	3	1	2	0	0	1	1	2	3	1	2	2	3	4	6	6	4	4	5	6	3	2	5	4	3	3	4	5	4	2
1000	1	2	0	1	1	可以	1	3	1	2	0	0	2	1	1	2	3	2	2	1	5	5	4	5	3	4	5	5	3	5	5	5	5	4	5	3	1
1001	1	2	0	1	1	斋烧鹅	1	3	1	2	0	0	1	2	2	1	1	2	2	1	6	4	5	7	3	6	2	1	5	7	6	5	6	7	6	6	2
1002	1	2	1	2	1	植物肉	1	1	1	1	1	2	1	1	1	1	3	1	2	2	5	7	7	4	4	5	6	3	5	4	5	6	6	7	7	5	3
1003	1	2	1	1	1	豆子，植物肉，环保	1	3	1	2	0	0	2	1	2	2	1	1	1	1	4	6	7	4	6	3	6	7	2	3	6	6	7	7	7	6	3
1004	1	2	0	1	3	素食加工	1	1	1	2	0	0	1	1	2	2	1	2	2	1	5	6	7	5	5	6	6	5	3	5	5	6	6	5	6	6	4
1005	1	2	1	1	1	高蛋白质，植物肉	1	3	1	2	0	0	2	1	2	1	1	1	2	1	5	3	3	6	2	7	3	5	6	5	6	5	5	6	6	7	2
1006	1	2	1	1	2	大豆	1	3	1	1	1	2	1	1	2	1	2	2	1	1	4	7	7	4	1	1	4	7	1	3	7	4	4	4	4	5	4
1007	1	2	1	1	3	培根	1	2	1	1	1	2	1	1	2	1	2	2	1	1	3	7	7	7	5	5	5	4	2	7	3	4	5	6	7	7	2
1008	1	2	1	1	3	肉丸子	3	3	1	2	0	0	1	1	2	1	1	1	2	1	4	5	6	4	2	5	4	6	2	4	5	5	6	4	4	2	3
1009	1	2	0	2	2	植物肉。是植物提取的	3	1	1	2	0	0	3	1	1	2	2	3	1	3	4	6	7	6	3	5	1	2	7	6	7	6	4	5	7	3	2
1010	1	2	0	1	1	鸡蛋	2	3	1	2	0	0	2	1	2	1	1	2	1	2	6	5	7	6	3	5	6	4	4	6	6	5	7	6	5	7	3
1011	1	2	1	1	3	味道	3	3	1	3	1	2	1	1	2	1	1	1	2	2	3	5	5	4	3	3	5	5	2	4	5	5	6	6	7	7	2
1012	1	2	0	1	1	香肠	1	1	1	3	1	3	1	1	2	2	2	2	1	1	6	3	5	7	7	4	6	4	5	7	4	4	7	6	5	5	2
1013	1	2	0	1	1	素肉	1	1	1	1	1	2	3	3	2	3	3	3	1	3	4	5	6	5	4	4	5	7	4	5	4	7	4	6	7	6	3
1014	1	2	1	3	1	不吃肉代替肉	1	2	1	2	0	0	1	2	1	2	2	2	2	1	5	4	3	5	5	4	5	3	4	4	5	3	5	4	3	4	2
1015	1	2	0	1	2	健康、难吃、高科技	1	1	1	2	0	0	1	1	2	1	1	2	2	2	4	5	6	6	5	4	5	4	4	5	6	5	5	6	6	5	3
1016	1	2	1	2	4	杂食	2	2	1	2	0	0	2	2	1	2	2	1	2	2	3	4	5	4	2	2	4	4	1	4	4	3	5	5	6	4	2
1017	1	2	1	2	3	植物混合	1	2	1	2	0	0	1	1	2	2	2	1	2	1	4	5	4	4	6	4	5	3	4	6	5	6	3	5	4	4	3
1018	1	2	0	1	1	假肉	1	1	1	2	0	0	2	1	1	2	2	1	1	1	6	5	4	5	4	5	4	5	4	6	6	4	5	7	5	6	2
1019	1	2	0	1	1	这是一种非常安全健康的饮食习惯	1	1	1	2	0	0	1	1	2	1	2	1	1	2	5	2	4	7	1	6	2	2	3	5	7	6	6	4	7	5	3
1020	1	2	1	1	1	素肉	1	1	1	2	0	0	1	1	2	1	2	1	1	1	3	7	6	5	3	5	3	4	5	5	5	6	5	7	5	5	3
1021	1	2	1	1	1	炸蘑菇	1	3	1	2	0	0	1	1	2	2	2	1	2	1	3	6	5	4	4	4	5	6	2	4	4	4	5	5	5	4	1
1022	1	2	0	1	3	合成肉	1	3	1	2	0	0	1	1	2	1	1	2	1	1	6	4	6	3	4	5	3	4	5	5	7	5	4	5	6	5	2
1023	1	2	1	1	1	肉丸	3	3	1	1	1	3	1	1	2	1	1	1	1	3	7	5	4	6	4	6	5	5	3	5	6	5	6	4	5	6	2
1024	1	2	0	1	1	好吃还不会发胖	1	2	1	2	0	0	1	2	1	1	1	1	2	2	7	2	3	6	1	6	2	4	5	5	4	5	4	4	6	7	2
1025	1	2	0	1	1	假肉	3	1	1	2	0	0	1	1	2	1	1	2	1	2	7	4	2	6	2	7	1	2	7	6	6	5	7	4	6	1	2
1026	1	2	0	1	3	蛋白质含量	1	3	1	2	0	0	1	1	1	2	1	2	1	1	6	5	3	5	3	6	4	2	6	6	6	6	6	7	6	4	3
1027	1	2	0	1	3	好奇	1	3	1	2	0	0	1	1	2	3	2	2	1	3	6	5	7	4	7	6	5	4	3	4	6	7	6	5	4	3	2
1028	1	2	1	1	3	无味	1	3	1	3	1	2	2	1	2	2	3	2	3	1	5	6	6	4	3	5	4	3	4	4	4	5	6	4	5	6	2
1029	1	2	1	1	2	不好吃	1	1	1	2	0	0	1	1	2	1	1	2	2	3	4	6	7	4	3	5	4	6	4	3	6	5	5	7	4	5	1
1030	1	2	0	1	1	豆干	3	1	1	2	0	0	2	1	2	1	2	1	1	2	3	6	6	6	3	5	5	3	5	6	5	4	3	6	5	3	1
1031	1	2	1	1	1	可以替代肉，可作为减脂期	1	2	1	1	1	3	1	1	2	2	1	2	2	1	5	6	7	4	2	5	4	4	3	4	5	4	3	5	6	4	2
1032	1	2	0	1	1	火腿	1	3	1	3	1	2	1	1	2	2	2	2	1	2	5	6	7	6	6	7	5	6	3	4	6	6	7	6	7	7	2
1033	1	2	0	1	3	素肉	3	1	1	3	1	2	1	1	2	1	1	2	1	1	5	6	3	4	3	2	4	5	4	5	4	5	5	4	5	4	2
1034	1	2	1	1	3	鸡蛋	1	1	1	3	1	1	2	1	2	2	2	1	1	2	5	4	6	5	5	4	5	3	5	4	5	5	4	5	4	6	1
1035	1	2	1	1	1	豆腐	1	2	1	3	1	1	2	1	2	2	1	1	1	1	6	5	4	6	6	6	5	4	5	6	7	6	4	5	6	5	2
1036	1	2	1	1	1	想起手撕牛排了，一个小零食，蛮好吃的	1	3	1	2	0	0	1	1	2	2	2	1	2	1	5	3	6	7	4	6	2	1	2	5	4	3	5	6	4	5	1
1037	1	2	1	1	3	素牛肉	1	2	1	2	0	0	1	1	2	2	1	2	2	1	5	6	7	4	3	5	2	5	4	4	2	4	6	7	7	7	2
1038	1	2	0	1	3	拥有肉类相近的营养，但是不是肉类	1	3	1	2	0	0	3	1	2	2	3	3	2	1	4	5	6	6	4	4	5	6	2	4	7	5	6	6	5	4	2
1039	1	2	0	4	1	素肉	1	2	1	2	0	0	2	1	2	1	2	2	1	1	5	2	4	6	7	5	4	6	5	6	7	3	6	5	6	5	3
1040	1	2	0	2	2	我觉得香肠挺好吃的	1	1	1	2	0	0	1	2	2	1	1	2	2	2	6	5	4	6	5	4	5	4	5	6	5	4	6	5	6	5	2
1041	1	2	1	1	1	豆腐	1	2	1	3	1	1	2	1	1	1	2	1	2	1	5	4	7	6	4	4	5	6	3	4	7	7	6	7	7	6	4
1042	1	2	1	1	2	没有可以替代	2	1	1	2	0	0	1	1	2	3	1	2	1	3	5	3	2	5	6	3	5	4	6	5	5	3	4	3	7	5	2
1043	1	2	0	5	4	厌恶	1	3	1	2	0	0	3	3	3	2	3	3	3	1	3	6	7	4	3	2	4	7	1	5	4	5	5	7	6	4	2
1044	1	2	1	1	3	豆制品，或者人造肉	3	3	1	2	0	0	1	1	1	3	3	2	1	3	3	6	4	5	2	6	2	2	5	5	4	5	3	4	2	3	3
1045	1	2	0	1	2	植物肉	1	3	1	2	0	0	1	1	2	1	1	3	2	1	5	5	5	6	4	5	3	5	4	6	4	3	2	5	5	4	2
1046	1	2	1	1	2	豆类食品	1	3	1	3	1	2	1	1	2	1	1	1	2	2	6	4	6	6	4	3	5	4	5	6	6	7	5	7	5	6	2
1047	1	2	0	1	1	没有	1	3	1	2	0	0	1	1	2	1	2	2	2	1	5	5	5	5	6	6	6	5	6	5	4	5	4	5	6	4	2
1048	1	2	0	1	3	不是真的肉吗 用素菜做的肉吗	1	1	1	2	0	0	1	1	2	1	1	1	2	1	5	4	4	5	3	6	4	3	6	6	5	5	6	5	5	6	3
1049	1	2	0	1	3	人造肉类？	3	3	1	2	0	0	1	1	2	2	1	1	1	2	5	6	7	4	5	5	5	4	3	2	7	5	5	5	4	5	2
1050	1	2	0	1	1	豆腐	1	2	1	3	1	2	1	1	2	1	1	2	1	1	4	6	6	4	3	6	3	2	5	6	6	7	6	6	7	4	2
1051	1	2	0	1	1	肉类替代品还挺好吃的，而且比肉类食品便宜很多	2	1	1	3	1	2	1	1	2	1	2	2	1	1	6	3	5	6	2	6	2	3	5	6	6	5	6	4	4	5	2
1052	1	2	0	2	1	和真的肉没什么区别	1	3	1	1	1	2	1	1	2	2	2	3	2	1	4	4	2	4	3	5	2	5	2	5	6	4	5	7	6	4	1
1053	1	2	0	1	1	豆制品	1	1	1	2	0	0	2	1	2	1	2	1	1	1	6	5	6	6	2	6	4	3	6	6	4	4	2	2	4	2	3
1054	1	2	0	1	2	有可以替换的呢	3	3	1	2	0	0	1	1	1	1	1	1	1	1	5	4	6	4	6	5	6	5	6	5	6	5	6	5	6	6	1
1055	1	2	1	1	1	豆制品	1	3	1	2	0	0	2	2	2	1	1	2	2	2	5	4	5	3	5	4	3	4	5	4	2	3	4	5	3	3	2
1056	1	2	1	2	2	怀疑且新奇	1	1	1	2	0	0	1	1	2	1	1	2	1	2	7	4	7	6	5	7	3	4	3	5	4	6	4	6	5	5	2
1057	1	2	1	1	4	汉堡的那个植物肉	3	3	1	2	0	0	1	1	2	2	2	2	1	3	2	6	7	4	3	5	5	4	3	3	2	2	1	1	4	1	2
1058	1	2	0	2	1	手撕牛肉	1	2	1	3	1	2	1	1	1	2	1	1	2	2	5	4	6	6	4	6	5	5	4	6	6	5	6	4	7	6	2
1059	1	2	1	1	1	一些网红的寺院对外开放餐厅中的斋饭	1	1	1	2	0	0	2	1	2	1	2	1	1	1	7	2	3	6	1	7	2	3	6	7	1	2	1	5	3	1	3
1060	1	2	0	1	1	植物肉	1	1	1	2	0	0	2	1	1	2	1	2	1	2	6	5	5	5	6	7	2	3	6	5	4	5	4	5	5	4	4
1061	1	2	0	1	2	不知道来源，不敢吃	3	1	1	1	1	3	1	1	2	1	2	1	1	1	4	3	3	3	5	5	5	3	2	6	5	6	6	4	6	5	2
1062	1	2	0	1	1	人造肉	1	3	1	2	0	0	1	1	2	2	2	3	1	1	4	4	6	6	3	5	3	2	4	5	4	5	5	5	5	4	2
1063	1	2	0	1	2	海克斯科技	1	3	1	3	1	2	1	1	2	3	2	2	1	1	6	4	4	6	4	6	4	5	3	6	4	5	5	4	4	4	2
1064	1	2	1	1	1	豆制品，口感不太真实	1	3	1	2	0	0	3	3	2	1	3	3	3	3	6	4	6	7	4	7	4	5	3	7	5	5	6	6	5	5	2
1065	1	2	1	1	3	面筋	3	1	1	3	1	2	1	1	3	2	1	3	2	3	3	5	6	4	4	3	5	5	3	4	5	5	4	6	6	5	3
1066	1	2	0	1	1	豆腐	1	2	1	2	0	0	2	1	2	2	1	1	1	1	5	3	6	6	2	5	3	6	3	5	6	6	5	6	5	5	2
1067	1	2	1	2	1	鸡肉淀粉肠	1	1	1	2	0	0	1	1	2	1	2	2	1	1	6	4	4	5	3	6	2	4	3	5	3	4	4	3	4	4	2
1068	1	2	1	1	1	素肉	1	3	1	2	0	0	1	1	2	1	1	1	2	1	3	5	7	6	2	7	4	5	1	5	6	5	4	6	5	4	1
1069	1	2	1	1	1	用其他的东西代替肉类的东西，比如：植物肉	1	3	1	2	0	0	1	1	2	1	2	1	1	1	4	6	4	7	2	6	3	3	3	6	5	6	5	5	5	5	2
1070	1	2	0	1	3	我感觉应该有肉味，但是我有点担忧不健康	1	2	1	2	0	0	1	1	2	3	1	3	1	3	3	6	7	7	2	6	1	6	4	6	6	3	5	7	6	6	2
1071	1	2	1	1	1	大豆制品	1	3	1	2	0	0	1	1	2	2	2	2	1	1	5	4	4	6	2	6	3	5	4	6	4	3	4	5	4	5	2
1072	1	2	1	1	1	火腿肠	1	1	1	2	0	0	1	1	2	2	1	3	1	1	4	4	1	4	2	2	2	4	5	5	6	4	6	4	6	4	3
1073	1	2	1	1	3	就是植物肉	1	3	1	2	0	0	1	1	2	1	1	1	1	1	5	3	3	6	6	5	2	3	6	5	3	3	4	3	4	3	2
1074	1	2	1	2	1	不是肉却含肉	1	3	1	2	0	0	2	1	1	1	2	1	1	2	5	4	5	5	3	5	3	2	4	4	5	4	3	4	4	4	3
1075	1	2	0	1	2	培根	1	1	1	2	0	0	2	1	1	2	2	2	1	2	5	4	6	4	2	6	1	4	3	4	5	3	5	5	4	3	2
1076	1	2	1	1	3	素牛肉	3	3	1	2	0	0	1	1	2	1	1	2	1	1	4	6	5	7	3	5	4	3	6	5	4	4	5	6	6	7	2
1077	1	2	1	1	4	合成食物	3	3	1	3	1	2	1	1	2	3	3	3	2	3	4	6	5	6	4	5	4	4	3	4	4	3	4	5	5	5	2
1078	1	2	1	4	1	替代品	1	2	1	2	0	0	1	3	2	2	1	3	1	1	5	4	6	7	3	7	2	4	1	7	4	5	4	5	7	4	2
1079	1	2	0	1	2	你找找看吧	2	3	1	3	1	2	1	2	1	2	1	2	1	1	3	4	2	1	2	4	3	2	3	6	6	5	4	3	2	4	2
1080	1	2	1	1	3	植物肉	3	2	1	3	1	2	1	1	2	1	2	1	2	1	6	3	7	6	3	6	3	5	4	6	6	6	4	6	6	6	2
1081	1	2	0	1	1	蛋白质奶类豆类鱼类等	1	3	1	1	1	2	1	1	2	1	2	1	2	1	4	6	7	4	3	5	2	4	4	5	6	7	5	6	4	6	2
1082	1	2	1	1	3	淀粉肠、素鸡（豆制品）、素牛肉这一类的食物	1	3	1	2	0	0	2	3	2	1	1	1	3	1	5	3	7	6	2	6	1	2	6	7	5	4	6	6	5	5	2
1083	1	2	1	1	2	不好吃	1	3	1	3	1	2	1	1	2	1	2	2	1	2	5	4	3	5	3	5	3	4	5	6	5	5	4	6	4	6	3
1084	1	2	1	1	1	豆蛋白代替	1	3	1	2	0	0	1	1	2	1	1	3	2	1	5	5	6	7	3	6	4	6	5	4	4	5	4	3	4	4	2
1085	1	2	1	1	3	培养肉	1	1	1	2	0	0	1	1	2	2	1	2	1	1	4	5	3	5	3	5	4	3	4	5	5	4	5	6	5	4	2
1086	1	2	1	1	1	大豆，蛋白质	3	2	1	2	0	0	2	1	2	2	2	1	2	1	6	5	6	6	2	6	2	7	1	6	4	6	6	7	7	7	2
1087	1	2	1	1	1	豆类产品	1	3	1	2	0	0	3	3	2	2	3	3	1	3	6	5	6	6	2	6	3	4	6	5	4	4	5	6	4	5	2
1088	1	2	1	1	1	淀粉勾芡肉	1	2	1	2	0	0	2	1	2	2	1	1	2	2	6	5	6	4	3	5	4	5	2	5	7	5	6	5	6	6	3
1089	1	2	0	1	1	素肉	1	1	1	2	0	0	2	3	2	3	3	3	3	3	6	5	3	6	2	6	3	3	6	7	6	7	7	6	7	6	3
1090	1	2	1	1	1	人工类肉制品	1	3	1	2	0	0	1	1	2	1	2	2	1	1	4	6	4	3	3	6	2	4	2	3	2	4	3	4	3	3	2
1091	1	2	0	1	1	植物肉，培根，素毛肚	1	3	1	2	0	0	2	1	2	2	2	1	1	1	6	1	2	7	1	6	1	4	7	7	6	7	7	6	7	7	3
1092	1	2	1	1	2	素肉	1	2	1	2	0	0	1	3	2	1	1	3	1	1	5	3	6	6	4	5	4	3	4	6	7	6	6	7	7	6	2
1093	1	2	1	1	3	不增重	2	1	1	2	0	0	3	3	2	1	1	1	1	1	4	6	6	5	3	5	4	3	2	3	4	6	5	6	5	6	1
1094	1	2	0	1	2	不是动物的肉，但是可以替代肉类补偿能力。	2	3	1	2	0	0	1	1	2	1	2	1	1	1	3	5	7	5	2	3	2	4	2	5	6	7	6	6	7	6	3
1095	1	2	1	1	1	味道还可以	1	3	1	2	0	0	1	2	2	1	1	3	2	3	5	7	7	4	6	6	3	2	4	4	6	7	6	6	5	4	3
1096	1	2	1	1	3	无	3	3	1	2	0	0	1	1	1	1	1	1	1	1	5	5	4	5	5	5	4	4	4	6	6	4	4	5	5	5	1
1097	1	2	0	2	2	好吧我们一起加油	1	3	1	2	0	0	1	1	2	1	3	3	1	2	1	2	3	6	6	3	5	2	5	4	1	5	2	6	2	5	3
1098	1	2	0	3	2	火腿肠	1	1	1	2	0	0	2	2	2	2	1	2	2	2	4	4	4	5	5	6	5	5	6	6	4	4	4	5	6	6	2
1099	1	2	0	1	4	没营养	3	3	1	2	0	0	1	1	2	2	1	1	2	1	5	5	6	4	3	4	3	3	5	6	6	5	6	5	5	4	2
1100	1	2	0	1	2	蟹棒	1	1	1	2	0	0	1	1	2	2	2	2	1	1	6	5	6	6	5	6	5	6	5	5	6	5	6	4	5	6	2
1101	1	2	0	1	2	面筋和豆腐	1	3	1	2	0	0	1	1	2	1	1	1	2	2	4	7	6	5	4	5	6	4	5	4	4	5	6	3	6	4	3
1102	1	2	1	1	1	可能不好吃，素素的味道	1	3	1	3	1	2	1	1	2	2	1	2	2	1	4	7	6	6	4	6	7	6	1	3	4	4	4	6	5	7	3
1103	1	2	1	1	3	素食，但是制作出来的味道和平常吃的肉的味道一样	1	1	1	2	0	0	1	1	2	1	1	1	2	1	6	4	5	6	3	5	2	3	4	5	6	6	6	7	7	6	3
1104	1	2	0	1	2	不知道	1	3	1	1	1	2	1	2	1	2	1	2	2	1	6	4	5	4	6	4	3	2	4	6	3	4	5	6	7	4	2
1105	1	2	1	1	1	豆制品	1	2	1	2	0	0	1	1	1	1	1	1	2	1	5	7	3	6	3	6	6	6	4	5	6	5	6	6	6	4	2
1106	1	2	1	1	1	伪荤菜	1	3	1	2	0	0	1	1	2	1	1	1	2	1	6	4	5	4	3	6	2	4	5	5	7	5	5	6	4	3	3
1107	1	2	1	1	3	加工合成产品	1	1	1	3	1	2	1	1	2	1	1	1	2	1	4	6	6	5	3	5	5	4	4	5	5	5	6	6	6	6	2
1108	1	2	1	1	3	替代肉类，补充蛋白质	1	3	1	2	0	0	1	1	2	1	1	3	2	3	6	4	5	6	3	6	2	4	7	4	5	5	4	6	5	5	3
1109	1	2	1	1	1	豆制品 肠类	1	1	1	2	0	0	2	1	2	1	2	1	1	1	5	5	4	6	3	5	2	5	5	5	5	5	5	6	5	5	1
1110	1	2	0	1	1	素肉零食 或者素食餐厅	1	3	1	2	0	0	1	1	2	1	1	2	2	2	5	6	7	5	3	6	4	1	6	7	5	5	6	7	4	5	2
1111	1	2	1	1	1	假 不是真肉	3	3	1	2	0	0	3	1	2	1	3	3	2	1	4	5	6	5	2	5	2	4	2	4	6	7	6	6	5	5	2
1112	1	2	0	1	3	安全	3	3	1	2	0	0	2	1	2	1	1	1	2	1	4	5	6	6	1	5	2	3	6	6	3	2	3	4	4	3	2
1113	1	2	0	1	1	好吃，但比肉还贵	1	2	1	3	1	2	1	2	2	1	2	2	1	1	5	5	6	4	3	5	3	5	5	4	5	3	5	5	6	5	4
1114	1	2	1	1	2	植物肉	1	2	1	2	0	0	1	3	3	1	1	3	2	1	4	6	7	3	4	4	6	6	4	4	6	7	6	7	6	5	4
1115	1	2	0	1	1	希望能代替肉，又能吃出肉的口感，肉的感觉，肉的味觉	3	1	1	3	1	2	3	1	2	3	2	1	2	1	4	7	5	7	4	5	3	2	1	5	6	5	7	4	6	7	2
1116	1	2	0	1	1	鱼	1	1	1	3	1	2	1	1	2	2	2	2	1	1	7	5	4	7	1	7	1	1	7	7	7	6	4	1	3	1	1
1117	1	2	0	1	3	人工合成	3	3	1	2	0	0	1	1	2	1	1	1	1	1	4	7	7	5	4	5	3	6	4	6	4	3	5	3	4	5	1
1118	1	2	1	1	1	新奇	1	3	1	2	0	0	1	1	1	1	2	2	1	1	3	5	4	6	2	6	3	4	1	5	6	4	5	7	6	4	2
1119	1	2	0	1	1	口感不错，回味无穷	1	1	1	3	1	2	1	1	2	1	2	1	1	2	7	5	7	6	1	7	2	5	6	7	7	7	7	6	7	7	4
1120	1	2	0	1	2	不好吃	1	3	1	2	0	0	1	2	2	1	3	2	1	2	4	5	3	6	3	7	5	4	6	5	4	6	4	7	6	5	2
1121	1	2	0	1	3	合成肉，但不是肉。	1	1	1	1	1	3	1	3	2	1	1	3	1	1	5	6	4	6	3	7	1	4	6	7	6	5	6	4	5	5	2
1122	1	2	0	1	1	鸡胸肉	3	1	1	3	1	2	3	3	2	3	2	3	1	1	5	6	7	6	5	5	6	4	3	4	4	5	4	5	6	5	1
1123	1	2	0	1	3	高科技	3	1	1	3	1	2	1	1	3	2	2	2	1	1	4	4	5	5	3	6	3	5	2	6	5	5	6	5	6	6	3
1124	1	2	0	1	1	不是肉类或者是添加一部分肉类制成的食品	3	3	1	2	0	0	1	1	2	1	1	1	2	2	5	4	3	5	3	4	3	4	3	5	5	6	5	6	5	5	3
1125	1	2	0	1	1	健康	1	3	1	3	1	2	1	1	2	2	1	1	1	1	3	5	7	6	3	5	5	3	1	6	7	6	6	5	5	5	2
1126	1	2	0	1	1	面筋肉	1	3	1	3	1	1	1	1	2	1	2	2	2	1	4	4	7	5	4	6	3	6	1	6	3	3	4	6	4	4	3
1127	1	2	0	1	2	黑科技	1	1	1	3	1	2	1	1	2	1	1	1	2	2	4	5	6	4	4	5	3	4	3	5	4	5	5	5	6	4	2
1128	1	2	0	1	1	豆腐	1	2	1	2	0	0	1	2	2	1	2	1	1	1	4	6	7	4	3	6	6	5	2	5	6	7	7	7	7	5	3
1129	1	2	1	1	1	用不是肉的东西做出肉的口味来	1	1	1	2	0	0	2	1	2	1	2	1	2	2	6	1	2	7	2	6	2	1	6	7	6	7	7	5	7	6	3
1130	1	2	1	1	1	健康，低脂，对身体有益的	1	1	1	2	0	0	1	1	2	2	2	1	2	1	6	3	5	6	2	5	2	5	6	7	6	7	6	5	6	5	2
1131	1	2	0	1	4	素食主义者	1	2	1	2	0	0	1	1	2	3	1	2	2	3	4	6	7	5	3	4	5	4	5	5	6	6	6	7	7	5	2
1132	1	2	0	1	1	干净	1	1	1	2	0	0	1	1	2	2	1	1	2	1	4	4	5	4	4	4	4	5	3	4	6	6	6	6	6	6	3
1133	1	2	0	1	1	好吃	2	1	1	2	0	0	2	1	1	2	2	1	2	2	6	5	7	4	6	4	6	5	4	7	6	6	5	4	6	5	2
1134	1	2	0	1	3	蛋白肉	1	2	1	3	1	1	1	1	2	2	2	1	2	1	5	4	5	6	4	5	5	3	2	5	5	6	5	6	3	4	2
1135	1	2	0	1	4	吃了不会有什么副作用吧	3	3	1	2	0	0	1	3	2	1	1	3	2	1	5	4	4	6	4	6	2	4	5	6	7	5	2	4	4	4	3
1136	1	2	0	1	1	素肉	3	3	1	2	0	0	2	1	2	1	1	1	1	1	4	5	7	4	3	4	4	3	3	5	6	7	5	4	6	6	2
1137	1	2	0	1	1	大豆蛋白制品	1	1	1	3	1	2	3	1	2	1	2	1	2	1	6	5	4	3	3	2	3	4	3	4	5	6	4	7	6	5	3
1138	1	2	0	2	2	是否根本能替代	2	3	1	2	0	0	1	2	2	1	3	1	2	2	6	4	2	3	3	4	6	5	7	3	3	2	3	4	5	6	2
1139	1	2	0	1	1	delicious	3	3	1	1	1	2	1	1	2	1	1	2	2	2	4	4	4	4	3	5	3	7	1	4	6	6	4	7	6	3	1
1140	1	2	0	1	1	味道不太好	1	3	1	2	0	0	1	1	2	1	1	1	2	1	3	6	6	4	3	3	4	5	6	3	5	6	6	7	5	6	1
1141	1	2	0	1	2	大豆制品	1	1	1	3	1	2	1	1	2	1	2	2	1	2	4	5	3	5	3	5	4	3	5	5	5	6	4	5	5	5	2
1142	1	2	0	1	1	经济	1	1	1	2	0	0	1	1	1	1	1	1	2	1	6	4	5	6	3	6	2	4	3	6	5	5	5	6	4	5	3
1143	1	2	0	1	4	假货	3	3	1	3	1	2	3	1	2	1	2	2	1	3	5	6	7	6	4	6	6	3	5	4	4	3	5	4	6	5	2
1144	1	2	0	1	1	肉嫩多汁	1	1	1	2	0	0	1	1	1	2	1	2	1	1	4	7	6	6	4	6	6	5	6	6	4	5	6	6	7	7	2
1145	1	2	0	1	1	素肉	1	3	1	2	0	0	2	1	2	1	1	1	1	2	5	4	4	5	4	5	3	6	3	4	5	4	4	6	5	4	3
1146	1	2	0	1	2	植物肉、人造肉	1	1	1	2	0	0	3	1	2	3	2	3	1	3	7	3	4	6	3	5	3	6	5	6	5	5	6	7	7	4	2
1147	1	2	0	1	1	素肉	1	3	1	2	0	0	1	1	2	1	2	2	1	2	6	5	6	7	7	5	6	6	5	7	5	5	6	4	5	5	2
1148	1	2	0	1	3	无	1	3	1	3	1	2	1	1	2	1	1	2	2	1	5	4	4	5	4	5	3	4	4	5	5	5	5	4	5	5	2
1149	1	2	0	1	3	不晓得好不好吃	3	1	1	3	1	1	3	3	2	1	1	1	2	1	6	3	1	4	3	5	3	3	5	5	6	6	7	7	7	7	1
1150	1	2	0	1	3	素鸡	3	3	1	3	1	3	1	1	2	1	1	1	2	1	7	4	6	7	3	6	3	6	4	7	7	7	5	4	4	6	1
1151	1	2	0	1	2	火腿肠	1	3	1	2	0	0	1	1	2	1	2	2	1	3	7	2	4	5	3	6	3	5	2	4	6	6	4	5	4	3	1
1152	1	2	0	1	1	鸡到，豆浆，豆腐	1	1	1	2	0	0	1	1	1	1	1	3	2	1	3	6	6	3	6	3	6	7	3	3	6	6	6	6	6	6	2
1153	1	2	0	1	1	鸡蛋牛奶	3	3	1	2	0	0	1	1	2	1	2	2	1	1	7	4	3	4	2	7	1	1	7	7	4	4	5	5	5	6	2
1154	1	2	1	1	1	素鸡等豆制品	1	3	1	1	1	2	2	3	2	1	2	1	1	1	6	5	7	7	1	5	2	5	3	6	5	6	4	7	3	4	3

## Sheet: List of variables
List of variables
ID	ID
information	0	no information provided (i.e., control group)
	1	information provided (i.e., treatment group)
Block	1	Block 1
	2	Block 2
gender	0	male
	1	female
dietary_preference	1	Omnivorous
	2	Flexitarian
	3	Pescetarian
	4	Vegetarian
	5	Vegan
experience	1	Yes, I have, and I would like to eat meat alternatives again.
	2	Yes, I have, but I don’t want to eat meat alternatives again.
	3	No, I haven’t, but I would like to give it a try in the future.
	4	No, I haven’t, and I don’t want to give it a try in the future.
association
knowledge1	1	TRUE
	2	FALSE
	3	I don't know
knowledge2	1	TRUE
	2	FALSE
	3	I don't know
explanation1	0	all control group respondents
	1	all treatment group respondents
test1	0	all control group respondents
	1	Antibiotics do not cause allergies.
	2 (correct answer)	The increase in antibiotic resistance is harmful to human health.
	3	Alternative meat products contain high levels of antibiotics.
explanation2	0	all control group respondents, and treatment group respondents who passed test1
	1	who failed test1
test2	0	all control group respondents, and treatment group respondents who passed test1
	1	Antibiotics do not cause allergies.
	2 (correct answer)	The increase in antibiotic resistance is harmful to human health.
	3	Alternative meat products contain high levels of antibiotics.
q1	Choice set 1
	1	I will buy Burger 1.
	2	I will buy Burger 2.
	3	I will not buy either.
q2	Choice set 2
	1	I will buy Burger 1.
	2	I will buy Burger 2.
	3	I will not buy either.
q3	Choice set 3
	1	I will buy Burger 1.
	2	I will buy Burger 2.
	3	I will not buy either.
q4	Choice set 4
	1	I will buy Burger 1.
	2	I will buy Burger 2.
	3	I will not buy either.
q5	Choice set 5
	1	I will buy Burger 1.
	2	I will buy Burger 2.
	3	I will not buy either.
q6	Choice set 6
	1	I will buy Burger 1.
	2	I will buy Burger 2.
	3	I will not buy either.
q7	Choice set 7
	1	I will buy Burger 1.
	2	I will buy Burger 2.
	3	I will not buy either.
q8	Choice set 8
	1	I will buy Burger 1.
	2	I will buy Burger 2.
	3	I will not buy either.
neophobia1	1. Strongly disagree, …, 7. Strongly agree	I am constantly sampling new and different foods.
neophobia2	1. Strongly disagree, …, 7. Strongly agree	I don’t trust new foods.
neophobia3	1. Strongly disagree, …, 7. Strongly agree	If I don’t know what is in a food, I won’t try it.
neophobia4	1. Strongly disagree, …, 7. Strongly agree	I like foods from different countries.
neophobia5	1. Strongly disagree, …, 7. Strongly agree	Ethnic food looks too weird to eat.
neophobia6	1. Strongly disagree, …, 7. Strongly agree	At dinner parties, I will try a new food.
neophobia7	1. Strongly disagree, …, 7. Strongly agree	I am afraid to eat things I have never had before.
neophobia8	1. Strongly disagree, …, 7. Strongly agree	I am very particular about the foods I will eat.
neophobia9	1. Strongly disagree, …, 7. Strongly agree	I will eat almost anything.
neophobia10	1. Strongly disagree, …, 7. Strongly agree	I like to try new ethnic restaurants.
gcv1	1. Strongly disagree, …, 7. Strongly agree	It is important to me that the products I use do not harm the environment.
gcv2	1. Strongly disagree, …, 7. Strongly agree	I consider the potential environmental impact of my actions when making many of my decisions.
gcv3	1. Strongly disagree, …, 7. Strongly agree	My purchase habits are affected by my concern for our environment.
gcv4	1. Strongly disagree, …, 7. Strongly agree	I am concerned about wasting the resources of our planet.
gcv5	1. Strongly disagree, …, 7. Strongly agree	I would describe myself as environmentally responsible.
gcv6	1. Strongly disagree, …, 7. Strongly agree	I am willing to be inconvenienced in order to take actions that are more environmentally friendly.
income	1	Japan_data: Below 20,000 Yen China_data: Below 1,000 Yuan
	2	Japan_data: 20,000 Yen ~ below 50,000 Yen China_data: 1,000 Yuan ~ below 2,000 Yuan
	3	Japan_data: 50,000 Yen ~ below 100,000 Yen China_data: 2,000 Yuan ~ below 5,000 Yuan
	4	Japan_data: Above 100,000 Yen China_data: Above 5,000 Yuan

## Sheet: Choice sets_design
Profile	Price	Carbon footprint (CO2eq)	Burger patty	Antibiotic claim	Traceability of the meat patty	Block	Alternative	Question No.
1	625Yen/25Yuan	7kg	Conventional meat	Antibiotic-free	Traceable	1	1	1
2	625Yen/25Yuan	1kg	Plant-based meat	No claim	Not traceable	1	2	1
3	625Yen/25Yuan	7kg	Cultured meat	No claim	Not traceable	1	1	2
4	550Yen/22Yuan	4kg	Conventional meat	No claim	Not traceable	1	2	2
5	550Yen/22Yuan	10kg	Conventional meat	No claim	Not traceable	1	1	3
6	750Yen/30Yuan	4kg	Plant-based meat	Antibiotic-free	Traceable	1	2	3
7	500Yen/20Yuan	7kg	Plant-based meat	No claim	Not traceable	1	1	4
8	550Yen/22Yuan	7kg	Conventional meat	Antibiotic-free	Not traceable	1	2	4
9	750Yen/30Yuan	1kg	Cultured meat	No claim	Traceable	1	1	5
10	750Yen/30Yuan	7kg	Plant-based meat	No claim	Traceable	1	2	5
11	750Yen/30Yuan	10kg	Conventional meat	No claim	Not traceable	1	1	6
12	500Yen/20Yuan	10kg	Cultured meat	Antibiotic-free	Not traceable	1	2	6
13	625Yen/25Yuan	10kg	Plant-based meat	Antibiotic-free	Not traceable	1	1	7
14	500Yen/20Yuan	4kg	Conventional meat	No claim	Traceable	1	2	7
15	550Yen/22Yuan	10kg	Plant-based meat	Antibiotic-free	Traceable	1	1	8
16	750Yen/30Yuan	7kg	Conventional meat	Antibiotic-free	Not traceable	1	2	8
17	750Yen/30Yuan	1kg	Conventional meat	Antibiotic-free	Not traceable	2	1	1
18	500Yen/20Yuan	1kg	Cultured meat	No claim	Not traceable	2	2	1
19	625Yen/25Yuan	4kg	Conventional meat	No claim	Traceable	2	1	2
20	750Yen/30Yuan	4kg	Conventional meat	No claim	Not traceable	2	2	2
21	750Yen/30Yuan	10kg	Cultured meat	Antibiotic-free	Traceable	2	1	3
22	500Yen/20Yuan	1kg	Conventional meat	Antibiotic-free	Traceable	2	2	3
23	550Yen/22Yuan	4kg	Cultured meat	Antibiotic-free	Traceable	2	1	4
24	550Yen/22Yuan	1kg	Plant-based meat	No claim	Traceable	2	2	4
25	550Yen/22Yuan	1kg	Conventional meat	Antibiotic-free	Not traceable	2	1	5
26	500Yen/20Yuan	10kg	Conventional meat	No claim	Traceable	2	2	5
27	550Yen/22Yuan	7kg	Cultured meat	No claim	Traceable	2	1	6
28	625Yen/25Yuan	10kg	Conventional meat	No claim	Traceable	2	2	6
29	500Yen/20Yuan	7kg	Conventional meat	Antibiotic-free	Traceable	2	1	7
30	625Yen/25Yuan	1kg	Conventional meat	Antibiotic-free	Traceable	2	2	7
31	500Yen/20Yuan	4kg	Plant-based meat	Antibiotic-free	Not traceable	2	1	8
32	625Yen/25Yuan	4kg	Cultured meat	Antibiotic-free	Not traceable	2	2	8
